# Supplementary material for: Differential Regulation of the Ribosomal Association of mRNA Transcripts in an Arabidopsis Mutant Defective in Jasmonate-Dependent Wound Response
Source: Front Plant Sci. 2021 Mar 11;12:637959. doi: 10.3389/fpls.2021.637959 (PMC7990880; doi:10.3389/fpls.2021.637959)
Supplement: Supplementary Table 3 — GO Enrichment Analysis of genes with transcripts that do not change transcriptionally but are differentially associating with the ribosomes (TRAP/total RNA) in unwounded and wounded Wt leaves. [file Table_3.XLSX]

## Sheet: Table S3
Supplementary Table S3. GO Enrichment Analysis of genes with transcripts that do not change transcriptionally but are differentially associating with the ribosomes (TRAP / total RNA) in unwounded and wounded WT leaves.
More associated with the ribosomes
GO_accession	Description	Over_represented_pValue	Fold Enrichment	Arabidopsis thaliana - REFLIST (27462)	Number of Genes in GO term category	Gene_names
GO:0080143	regulation of amino acid export	0.00438242	67.3501	7	4	AT2G24762,AT5G57685,AT3G30725,AT5G38770,
GO:1903789	regulation of amino acid transmembrane transport	0.00438242	67.3501	7	4	AT2G24762,AT5G57685,AT3G30725,AT5G38770,
GO:1903959	regulation of anion transmembrane transport	0.00342047	32.7396	18	5	AT2G24762,AT5G57685,AT3G30725,AT5G38770,AT4G05590,
GO:0044070	regulation of anion transport	0.00655037	28.0625	21	5	AT2G24762,AT5G57685,AT3G30725,AT5G38770,AT4G05590,
GO:0043269	regulation of ion transport	0.0156262	15.0463	47	6	AT2G24762,AT3G03000,AT5G57685,AT3G30725,AT5G38770,AT4G05590,
GO:0051049	regulation of transport	0.0451068	7.66586	123	8	AT2G24762,AT3G03000,AT1G25250,AT5G57685,AT3G30725,AT5G38770,AT1G68130,AT4G05590,
GO:0034765	regulation of ion transmembrane transport	0.0225263	21.0469	28	5	AT2G24762,AT5G57685,AT3G30725,AT5G38770,AT4G05590,
GO:0034762	regulation of transmembrane transport	0.0350536	19.0101	31	5	AT2G24762,AT5G57685,AT3G30725,AT5G38770,AT4G05590,
GO:0051955	regulation of amino acid transport	0.00438242	67.3501	7	4	AT2G24762,AT5G57685,AT3G30725,AT5G38770,
GO:0032890	regulation of organic acid transport	0.00438242	67.3501	7	4	AT2G24762,AT5G57685,AT3G30725,AT5G38770,
GO:0051952	regulation of amine transport	0.00438242	67.3501	7	4	AT2G24762,AT5G57685,AT3G30725,AT5G38770,
GO:0006878	cellular copper ion homeostasis	0.0233825	39.2876	12	4	AT3G15353,AT5G20650,AT3G56240,AT3G09390,
GO:0009299	mRNA transcription	0.00269533	34.6655	17	5	AT3G23290,AT4G18610,AT5G58500,AT2G42610,AT1G78815,
GO:0008152	metabolic process	0.037124	0.589039	8604	43	AT3G23290,AT1G65860,AT2G14620,AT5G50750,AT1G66410,AT3G58990,AT3G22740,AT1G78815,AT1G12630,AT5G07460,AT2G02930,AT1G26970,AT5G55560,AT5G04230,AT5G39850,AT5G57500,AT1G76410,AT4G39260,AT2G42610,AT2G27510,AT4G16640,AT2G43100,AT4G37400,AT1G60680,AT4G04830,AT5G20650,AT5G23020,AT3G05590,AT4G04810,AT2G30860,AT1G31720,AT1G16400,AT3G43800,AT4G39730,AT4G18610,AT1G72220,AT5G58500,AT3G09240,AT5G37780,AT4G39770…
GO:0071704	organic substance metabolic process	0.0297624	0.560097	7786	37	AT3G23290,AT1G65860,AT2G14620,AT5G50750,AT1G66410,AT3G58990,AT3G22740,AT1G78815,AT1G12630,AT5G07460,AT1G26970,AT5G55560,AT5G04230,AT5G39850,AT5G57500,AT1G76410,AT4G39260,AT2G42610,AT2G43100,AT4G37400,AT4G04830,AT5G20650,AT5G23020,AT3G05590,AT4G04810,AT1G31720,AT1G16400,AT3G43800,AT4G18610,AT1G72220,AT5G58500,AT3G09240,AT5G37780,AT4G39770,AT3G12500,AT1G01640,AT4G37970,
GO:0044238	primary metabolic process	0.00364477	0.494321	7153	30	AT3G23290,AT1G65860,AT2G14620,AT5G50750,AT1G66410,AT3G58990,AT3G22740,AT1G78815,AT5G07460,AT1G26970,AT5G55560,AT5G04230,AT5G39850,AT5G57500,AT1G76410,AT4G39260,AT2G42610,AT2G43100,AT4G04830,AT5G20650,AT5G23020,AT3G05590,AT4G04810,AT4G18610,AT1G72220,AT5G58500,AT3G09240,AT5G37780,AT4G39770,AT1G01640,
GO:0019748	secondary metabolic process	0.00895034	5.05681	303	13	AT1G65860,AT5G23020,AT2G30860,AT3G58990,AT1G31720,AT1G16400,AT1G12630,AT3G43800,AT2G02930,AT5G04230,AT2G43100,AT4G37400,AT4G37970,
GO:0009414	response to water deprivation	0.049867	4.27993	358	13	AT3G57540,AT1G05260,AT2G15970,AT5G15970,AT5G15960,AT4G39730,AT1G73330,AT5G59320,AT1G01470,AT5G12140,AT2G05520,AT3G50970,AT1G46768,
GO:0006950	response to stress	0.000173788	2.12913	3100	56	AT3G49580,AT3G05880,AT3G56710,AT1G35310,AT3G27630,AT1G05260,AT5G19875,AT5G59320,AT1G22990,AT3G10190,AT3G14430,AT5G58390,AT4G39260,AT4G30650,AT3G50970,AT1G46768,AT1G77380,AT1G10140,AT4G04830,AT1G35260,AT3G10525,AT3G56240,AT5G22270,AT1G12200,AT5G42180,AT4G38580,AT5G10140,AT3G12500,AT5G40370,AT3G57540,AT2G15970,AT5G15970,AT5G07460,AT4G14465,AT1G01470,AT5G04230,AT1G70890,AT2G05520,AT2G02130,AT4G04810…
GO:0050896	response to stimulus	8.8152e-10	2.04312	5538	96	AT3G27630,AT3G50770,AT1G66410,AT1G05260,AT5G19875,AT3G10190,AT1G46480,AT5G55560,AT3G14430,AT5G58390,AT4G39260,AT1G46768,AT1G77380,AT4G04830,AT3G10525,AT2G33830,AT3G56240,AT1G70800,AT2G40080,AT4G29080,AT4G38580,AT5G10140,AT3G48550,AT3G23290,AT5G40370,AT3G57540,AT2G15970,AT1G78815,AT1G69260,AT5G07460,AT2G02930,AT4G14465,AT1G01470,AT5G04230,AT1G70890,AT2G05520,AT2G02130,AT4G10380,AT4G04810,AT3G02885…
GO:0042221	response to chemical	0.00199628	2.11413	2676	48	AT3G49580,AT3G05880,AT1G66410,AT1G05260,AT5G59320,AT1G22990,AT4G39260,AT3G50970,AT1G46768,AT1G10140,AT5G20650,AT3G56240,AT5G22270,AT4G29080,AT1G43040,AT3G12500,AT5G40370,AT3G57540,AT2G15970,AT5G15970,AT5G25890,AT1G69260,AT5G07460,AT2G02930,AT1G01470,AT5G12330,AT2G05520,AT4G10380,AT3G49570,AT3G02885,AT3G22231,AT5G15960,AT2G30860,AT3G49930,AT1G76800,AT5G66350,AT3G43800,AT4G39730,AT1G73330,AT1G74660…
GO:0010035	response to inorganic substance	0.0432742	2.84006	913	22	AT1G66410,AT3G57540,AT1G05260,AT2G15970,AT5G15970,AT5G15960,AT2G30860,AT3G56240,AT1G76800,AT4G39730,AT1G73330,AT5G59320,AT1G22990,AT1G01470,AT5G12140,AT4G39260,AT2G05520,AT4G34600,AT3G50970,AT5G37780,AT1G46768,AT3G12500,AT4G39410,
GO:0009628	response to abiotic stimulus	5.68637e-05	2.49123	2129	45	AT3G23290,AT3G49580,AT3G05880,AT3G56710,AT1G66410,AT3G57540,AT1G05260,AT2G15970,AT5G15970,AT1G68130,AT1G16510,AT1G78815,AT5G07460,AT5G59320,AT1G01470,AT4G39260,AT2G05520,AT2G42610,AT3G50970,AT5G06850,AT1G46768,AT1G10140,AT3G02885,AT3G55370,AT3G22231,AT5G15960,AT5G22270,AT1G70800,AT3G43800,AT4G39730,AT1G73330,AT2G40080,AT1G74660,AT1G73010,AT4G18610,AT1G22220,AT1G25250,AT4G38580,AT5G58500,AT5G10140…
GO:0009605	response to external stimulus	0.00222093	2.58093	1507	33	AT3G49580,AT3G56710,AT1G66410,AT2G15970,AT1G68130,AT1G16510,AT2G02930,AT4G14465,AT3G10190,AT1G01470,AT5G57685,AT4G39260,AT4G30650,AT3G50970,AT4G10380,AT3G10525,AT2G33830,AT2G30080,AT3G22231,AT3G60640,AT2G30860,AT1G70800,AT5G65340,AT1G66480,AT1G12200,AT2G40080,AT1G73010,AT1G25250,AT5G12140,AT3G48550,AT1G04330,AT5G37780,AT4G12470,AT3G12500,
Less associated with the polysomes
GO_accession	Description	Over_represented_pValue	Fold Enrichment	Arabidopsis thaliana - REFLIST (27462)	Number of Genes in GO term category	Gene_names
GO:0015990	electron transport coupled proton transport	0.00582816	22.27	10	6	ATCG01010,ATCG01050,ATMG00580,AT2G07633,ATMG01360,ATCG00430,
GO:0015988	energy coupled proton transmembrane transport, against electrochemical gradient	0.00582816	22.27	10	6	ATCG01010,ATCG01050,ATMG00580,AT2G07633,ATMG01360,ATCG00430,
GO:1902600	proton transmembrane transport	1.4404e-05	6.71	94	17	ATMG00640,ATMG00580,AT2G07633,ATCG00130,AT3G42640,ATCG01010,ATCG00140,ATCG00470,ATCG00480,ATCG01050,AT1G17260,AT3G60330,ATMG01360,ATMG01170,ATCG00430,ATCG00120,ATMG01090,
GO:0015672	monovalent inorganic cation transport	9.39577e-05	4.61	169	21	ATMG00640,ATMG00580,AT2G07633,AT3G02850,ATCG00130,AT3G42640,ATCG01010,AT5G55470,ATCG00140,ATCG00470,ATCG00480,AT3G17630,ATCG01050,AT1G17260,AT3G60330,ATMG01360,ATMG01170,ATCG00430,ATCG00120,ATMG01090,AT5G02940,
GO:0006812	cation transport	0.0154844	2.64	407	29	AT3G58810,ATMG00110,AT2G07633,AT2G32270,AT3G02850,AT2G07718,AT3G42640,ATCG01010,AT1G73220,ATCG00140,ATCG00480,ATCG01050,AT3G60330,ATMG01170,AT2G04032,ATCG00120,ATMG01090,ATMG00640,ATMG00580,AT2G17780,ATCG00130,AT5G55470,ATCG00470,ATCG01040,AT3G17630,AT1G17260,ATMG01360,ATCG00430,AT5G02940,
GO:0006810	transport	0.000706264	1.7	2249	103	AT3G58810,AT4G21180,AT3G21250,AT3G02850,AT1G73220,AT3G47750,AT3G60330,AT4G33200,AT5G43900,ATMG00640,AT3G50380,AT4G05520,AT1G04160,AT3G43300,AT1G50970,AT1G17260,AT2G20290,AT2G29940,AT3G04490,ATMG00110,AT1G48090,AT3G55480,AT1G67120,AT3G56450,AT4G22970,AT2G32270,AT2G33240,AT2G07718,AT2G25810,AT3G42640,ATCG01010,AT1G27940,AT4G09160,AT5G55220,AT5G60780,AT5G10470,ATMG01170,AT1G53270,AT2G04032,AT2G04030…
GO:0051234	establishment of localization	0.000300438	1.71	2294	106	AT3G58810,AT4G21180,AT3G21250,AT3G02850,AT1G73220,AT3G47750,AT3G60330,AT4G33200,AT5G43900,ATMG00640,AT3G50380,AT4G05520,AT1G04160,AT5G15540,AT3G43300,AT1G50970,AT1G17260,AT2G20290,AT2G29940,AT3G04490,ATMG00110,AT1G48090,AT3G55480,AT1G67120,AT3G56450,AT4G22970,AT2G32270,AT2G33240,AT2G07718,AT2G25810,AT3G42640,ATCG01010,AT1G27940,AT4G09160,AT5G55220,AT5G60780,AT5G10470,ATMG01170,AT1G53270,AT2G04032…
GO:0051179	localization	0.00146597	1.65	2459	109	AT3G58810,AT4G21180,AT3G21250,AT3G02850,AT1G73220,AT2G22125,AT3G47750,AT3G60330,AT4G33200,AT5G43900,ATMG00640,AT3G50380,AT4G05520,AT1G04160,AT5G15540,AT3G43300,AT1G50970,AT1G17260,AT2G20290,AT2G29940,AT3G04490,ATMG00110,AT1G48090,AT3G55480,AT1G67120,AT3G56450,AT4G22970,AT2G32270,AT2G33240,AT2G07718,AT2G25810,AT3G42640,ATCG01010,AT1G27940,AT4G09160,AT5G55220,AT5G60780,AT5G10470,ATMG01170,AT1G53270…
GO:0098662	inorganic cation transmembrane transport	0.000440859	3.84481	222	23	ATMG00640,AT3G58810,ATMG00580,AT2G07633,AT2G32270,AT3G02850,AT2G17780,ATCG00130,AT3G42640,ATCG01010,AT5G55470,ATCG00140,ATCG00470,ATCG00480,ATCG01050,AT1G17260,AT3G60330,ATMG01360,ATMG01170,AT2G04032,ATCG00430,ATCG00120,ATMG01090,
GO:0098655	cation transmembrane transport	0.000681362	3.74363	228	23	ATMG00640,AT3G58810,ATMG00580,AT2G07633,AT2G32270,AT3G02850,AT2G17780,ATCG00130,AT3G42640,ATCG01010,AT5G55470,ATCG00140,ATCG00470,ATCG00480,ATCG01050,AT1G17260,AT3G60330,ATMG01360,ATMG01170,AT2G04032,ATCG00430,ATCG00120,ATMG01090,
GO:0055085	transmembrane transport	0.0288501	2.04001	855	47	AT3G58810,ATMG00110,AT2G07633,AT3G21250,AT1G74810,AT2G32270,AT1G30420,AT3G02850,AT2G25810,AT3G42640,ATCG01010,ATCG00140,AT1G27940,ATCG00480,ATCG01050,AT5G60780,AT3G47750,AT3G60330,ATMG01170,AT1G53270,AT2G04032,AT2G04030,ATCG00120,ATMG01090,AT4G15230,ATMG00640,AT3G55110,ATMG00580,AT4G02510,AT1G27040,AT1G30410,AT1G10540,AT2G34660,AT2G17780,ATCG00130,AT5G55470,ATCG00470,AT1G54730,AT1G17260,AT5G61740…
GO:0009987	cellular process	6.03554e-27	1.48991	11931	479	AT3G58810,AT4G02660,AT4G21180,AT3G53240,AT3G11964,AT1G10450,AT5G20860,AT1G10570,AT3G06010,AT2G43900,AT4G02780,AT3G09405,ATCG00180,AT1G54385,AT2G28620,AT3G12810,AT5G22800,AT1G55490,AT5G18410,AT1G67230,AT3G43300,ATCG01020,ATCG00050,AT1G69770,ATCG00170,AT5G04140,AT1G01600,AT2G29940,ATMG00090,AT4G23260,AT3G54670,AT1G67120,AT1G32583,AT3G23730,AT1G71866,AT2G07718,ATCG01010,ATCG00040,AT4G09160,AT4G36690…
GO:0098660	inorganic ion transmembrane transport	0.00190286	3.51255	243	23	ATMG00640,AT3G58810,ATMG00580,AT2G07633,AT2G32270,AT3G02850,AT2G17780,ATCG00130,AT3G42640,ATCG01010,AT5G55470,ATCG00140,ATCG00470,ATCG00480,ATCG01050,AT1G17260,AT3G60330,ATMG01360,ATMG01170,AT2G04032,ATCG00430,ATCG00120,ATMG01090,
GO:0030050	vesicle transport along actin filament	3.55201e-06	20.6171	18	10	AT5G20490,AT1G17580,AT1G04160,AT1G08730,AT4G27370,AT4G33200,AT2G20290,AT3G58160,AT2G33240,AT5G43900,
GO:0099518	vesicle cytoskeletal trafficking	3.72637e-07	21.4852	19	11	AT5G20490,AT1G17580,AT1G04160,AT1G08730,AT4G27370,AT4G33200,AT2G20290,AT3G58160,AT4G14330,AT2G33240,AT5G43900,
GO:0030705	cytoskeleton-dependent intracellular transport	1.38243e-11	19.1177	33	17	AT5G20490,AT5G27950,AT1G04160,AT3G54870,AT4G27370,AT3G58160,AT5G65460,AT4G26660,AT2G33240,AT3G63480,AT1G17580,AT5G10470,AT1G08730,AT4G33200,AT2G20290,AT4G14330,AT5G43900,
GO:0046907	intracellular transport	0.00232225	2.30661	724	45	AT4G21180,AT5G24740,AT3G08530,AT5G27950,AT3G04490,AT3G54870,AT1G48090,AT3G55480,AT1G67120,AT3G56450,AT2G33240,AT3G63480,ATCG00480,AT5G10470,AT4G33200,AT2G04030,AT5G43900,AT1G79280,AT5G17020,AT3G50380,AT3G03110,AT4G05520,AT5G20490,AT1G08560,AT4G02510,AT1G04160,AT1G24706,AT4G27370,AT5G24350,AT2G14255,AT3G58160,AT5G65460,AT4G26660,ATCG00130,ATCG00470,AT3G63130,AT1G50970,AT3G11130,AT1G17580,AT1G08730…
GO:0051649	establishment of localization in cell	0.00155493	2.27407	767	47	AT4G21180,AT5G24740,AT3G08530,AT5G27950,AT3G04490,AT3G54870,AT1G48090,AT3G55480,AT1G67120,AT3G56450,AT2G33240,AT3G63480,ATCG00480,AT5G10470,AT4G33200,AT3G51300,AT2G04030,AT5G43900,AT1G79280,AT5G17020,AT3G50380,AT3G03110,AT4G05520,AT5G20490,AT1G08560,AT4G02510,AT1G04160,AT1G24706,AT4G27370,AT5G24350,AT2G14255,AT3G58160,AT5G65460,AT4G26660,ATCG00130,ATCG00470,AT3G63130,AT1G50970,AT3G11130,AT1G17580…
GO:0051641	cellular localization	0.0264992	1.99092	932	50	AT4G21180,AT5G24740,AT3G63480,AT2G22125,AT1G77460,AT4G33200,AT3G51300,AT5G43900,AT3G50380,AT3G03110,AT4G05520,AT5G20490,AT1G08560,AT1G04160,AT1G24706,AT5G15540,AT4G27370,AT2G14255,ATCG00130,AT3G63130,AT1G50970,AT3G11130,AT1G17580,AT3G48870,AT2G20290,AT3G08530,AT5G27950,AT3G04490,AT3G54870,AT1G48090,AT3G55480,AT1G67120,AT3G56450,AT2G33240,ATCG00480,AT5G10470,AT2G04030,AT1G79280,AT5G17020,AT4G02510…
GO:0051650	establishment of vesicle localization	1.0924e-06	15.3562	29	12	AT5G20490,AT1G17580,AT1G04160,AT1G08730,AT4G27370,AT4G33200,AT3G51300,AT2G20290,AT3G58160,AT4G14330,AT2G33240,AT5G43900,
GO:0051648	vesicle localization	1.0924e-06	15.3562	29	12	AT5G20490,AT1G17580,AT1G04160,AT1G08730,AT4G27370,AT4G33200,AT3G51300,AT2G20290,AT3G58160,AT4G14330,AT2G33240,AT5G43900,
GO:0051640	organelle localization	0.000465265	4.57861	154	19	AT5G17020,AT3G03110,AT5G20490,AT1G08560,AT1G04160,AT4G27370,AT1G67120,AT3G58160,AT5G65460,AT2G33240,AT1G17580,AT5G10470,AT1G08730,AT4G33200,AT3G51300,AT2G20290,AT5G38150,AT4G14330,AT5G43900,
GO:0051656	establishment of organelle localization	9.01653e-07	7.59085	88	18	AT5G17020,AT3G03110,AT5G20490,AT1G04160,AT4G27370,AT1G67120,AT3G58160,AT5G65460,AT2G33240,AT1G17580,AT5G10470,AT1G08730,AT4G33200,AT3G51300,AT2G20290,AT5G38150,AT4G14330,AT5G43900,
GO:0099515	actin filament-based transport	8.97465e-08	20.2423	22	12	AT5G20490,AT1G17580,AT1G04160,AT5G10470,AT1G08730,AT4G27370,AT4G33200,AT2G20290,AT3G58160,AT5G65460,AT2G33240,AT5G43900,
GO:0030048	actin filament-based movement	1.33324e-07	19.3622	23	12	AT5G20490,AT1G17580,AT1G04160,AT5G10470,AT1G08730,AT4G27370,AT4G33200,AT2G20290,AT3G58160,AT5G65460,AT2G33240,AT5G43900,
GO:0030029	actin filament-based process	0.00083108	5.25463	113	16	AT5G20490,AT5G18410,AT1G04160,AT4G27370,AT3G58160,AT5G65460,AT2G33240,AT4G18600,AT1G17580,AT5G10470,AT1G08730,AT4G33200,AT3G51300,AT2G20290,AT2G29890,AT5G43900,
GO:0006928	movement of cell or subcellular component	8.1673e-25	15.089	91	37	AT4G24170,AT5G27950,AT3G23670,AT3G54870,AT3G19050,AT2G33240,AT3G63480,AT1G72250,AT5G54670,AT5G65930,AT3G17360,AT5G10470,AT3G20150,AT4G33200,AT2G28620,AT5G23910,AT5G43900,AT4G21270,AT5G20490,AT3G50240,AT1G04160,AT4G27370,AT3G58160,AT5G65460,AT2G36200,AT4G26660,AT4G05190,AT3G10180,AT5G60930,AT1G18370,AT1G17580,AT2G22610,AT1G08730,AT3G44050,AT2G20290,AT4G14150,AT4G14330,
GO:0007018	microtubule-based movement	2.60821e-17	14.7352	68	27	AT4G24170,AT5G27950,AT3G23670,AT3G54870,AT3G19050,AT3G63480,AT1G72250,AT5G54670,AT5G65930,AT3G17360,AT5G10470,AT3G20150,AT2G28620,AT5G23910,AT4G21270,AT3G50240,AT5G65460,AT2G36200,AT4G26660,AT4G05190,AT3G10180,AT5G60930,AT1G18370,AT2G22610,AT3G44050,AT4G14150,AT4G14330,
GO:0007017	microtubule-based process	1.77831e-12	5.8596	228	36	AT5G51600,AT4G24170,AT5G27950,AT3G23670,AT3G54870,AT1G11160,AT5G18700,AT3G19050,AT3G63480,AT1G72250,AT5G54670,AT1G20570,AT5G65930,AT3G17360,AT2G22125,AT5G10470,AT3G20150,AT2G28620,AT5G23910,AT4G21270,AT2G38720,AT2G35630,AT3G50240,AT5G65460,AT2G36200,AT4G26660,AT2G20815,AT4G05190,AT3G10180,AT5G60930,AT1G18370,AT2G22610,AT3G44050,AT4G14150,AT1G03780,AT4G14330,
GO:0000281	mitotic cytokinesis	0.01285	8.34993	40	9	AT1G69770,AT3G17360,AT3G23670,AT2G22125,AT5G18700,AT3G19050,AT4G14150,AT2G28620,AT4G15320,
GO:0061640	cytoskeleton-dependent cytokinesis	0.00310384	7.42216	55	11	AT2G35630,AT1G69770,AT3G17360,AT3G23670,AT2G22125,AT1G50240,AT5G18700,AT3G19050,AT4G14150,AT2G28620,AT4G15320,
GO:0000910	cytokinesis	1.01114e-06	6.98124	101	19	AT5G51600,AT2G35630,AT3G23670,AT5G18700,AT3G19050,AT4G22970,AT3G63130,AT1G69770,AT1G01040,AT3G17360,AT1G18370,AT2G22125,AT1G50240,AT5G10470,AT3G44050,AT1G53140,AT4G14150,AT2G28620,AT4G15320,
GO:0022402	cell cycle process	1.62518e-17	4.94811	420	56	AT2G36850,AT5G51600,AT3G23670,AT1G34460,AT5G18700,AT3G19050,AT2G01905,AT5G48390,AT5G52290,AT3G63480,AT3G20475,AT5G54670,AT1G22275,AT1G20570,AT2G22125,AT2G28620,AT1G02065,AT4G21270,AT5G48600,AT1G64960,AT2G27170,AT2G31970,AT5G15540,AT1G65010,AT5G67100,AT2G20815,AT3G63130,AT1G69770,AT1G01040,AT4G37490,AT4G14150,AT1G03780,AT4G15320,AT3G54670,AT3G23890,AT4G22970,AT2G32590,AT3G17360,AT4G14700,AT1G50240…
GO:0007049	cell cycle	5.80974e-18	4.79111	457	59	AT2G36850,AT5G51600,AT3G23670,AT1G34460,AT5G18700,AT3G19050,AT2G01905,AT5G48390,AT5G52290,AT3G63480,AT3G20475,AT5G54670,AT1G22275,AT1G20570,AT2G22125,AT2G28620,AT1G02065,AT4G21270,AT5G48600,AT1G64960,AT2G27170,AT2G31970,AT5G15540,AT1G65010,AT5G67100,AT2G20815,AT3G63130,AT1G69770,AT1G01040,AT4G37490,AT4G14150,AT1G03780,AT4G15320,AT1G35530,AT3G54670,AT3G23890,AT4G22970,AT2G32590,AT3G17360,AT4G14700…
GO:0051301	cell division	5.28777e-07	4.77139	210	27	AT5G51600,AT3G23670,AT5G18700,AT3G19050,AT4G22970,AT4G31805,AT1G80080,AT5G60880,AT5G10890,AT3G17360,AT2G22125,AT1G50240,AT5G10470,AT2G28620,AT2G35630,AT5G20490,AT4G32700,AT3G63130,AT1G69770,AT1G01040,AT1G18370,AT1G17580,AT3G44050,AT1G53140,AT4G14150,AT4G15320,AT2G26890,
GO:1903047	mitotic cell cycle process	2.66414e-07	4.93592	203	27	AT3G54670,AT3G23670,AT3G23890,AT1G34460,AT5G18700,AT3G19050,AT2G01905,AT2G32590,AT3G17360,AT2G22125,AT4G14700,AT2G28620,AT5G48600,AT1G64960,AT2G27170,AT2G35630,AT3G50240,AT5G15540,AT2G17620,AT2G20635,AT5G67100,AT5G60930,AT1G69770,AT4G37490,AT4G14150,AT1G03780,AT4G15320,
GO:0000278	mitotic cell cycle	6.07836e-07	4.41071	244	29	AT3G54670,AT3G23670,AT3G23890,AT1G34460,AT5G18700,AT3G19050,AT2G01905,AT2G32590,AT1G20570,AT3G17360,AT2G22125,AT4G14700,AT2G28620,AT5G48600,AT1G64960,AT1G08260,AT2G27170,AT2G35630,AT3G50240,AT5G15540,AT2G17620,AT2G20635,AT5G67100,AT5G60930,AT1G69770,AT4G37490,AT4G14150,AT1G03780,AT4G15320,
GO:0000911	cytokinesis by cell plate formation	9.30124e-06	8.30839	67	15	AT5G51600,AT2G35630,AT3G23670,AT5G18700,AT3G19050,AT4G22970,AT3G63130,AT1G01040,AT3G17360,AT1G18370,AT1G50240,AT5G10470,AT1G53140,AT4G14150,AT2G28620,
GO:0009767	photosynthetic electron transport chain	0.029592	7.42216	45	9	ATCG00680,ATCG00020,ATCG00580,ATCG00270,ATCG00280,ATCG01060,ATCG00600,ATCG00730,ATCG00540,
GO:0022900	electron transport chain	7.84935e-07	6.62693	112	20	ATMG00650,ATMG00580,AT2G07687,AT2G07727,AT2G07718,ATCG00680,ATCG01010,ATCG00020,ATCG00580,ATCG00270,ATCG00280,ATCG01060,ATCG01070,ATCG00600,ATCG00720,ATMG01360,ATCG00730,ATMG01280,ATMG00160,ATCG00540,
GO:0008152	metabolic process	1.22336e-05	1.33278	8604	309	AT2G33540,ATMG00650,AT3G11964,AT1G10450,AT5G20860,AT1G60270,AT1G10570,AT2G43900,AT1G14250,AT5G55720,AT3G03300,AT4G02780,AT1G31950,AT1G74550,ATCG00180,AT1G54385,ATCG00500,AT3G47110,AT3G51740,ATCG00740,AT3G15520,AT5G56490,AT5G22800,ATMG00640,AT5G25980,AT1G24190,AT1G16440,AT1G61490,AT4G08990,AT2G31250,ATCG01020,AT5G59650,AT1G49340,ATCG00050,AT1G69770,ATCG00170,AT1G01040,AT5G04140,AT5G02880,ATCG00730…
GO:0006091	generation of precursor metabolites and energy	3.66619e-06	3.45446	376	35	AT5G42270,ATMG00650,AT2G07633,AT2G07718,ATCG00680,ATCG01010,ATCG00020,ATCG00360,ATCG00580,ATCG00480,ATCG00280,ATCG01050,ATCG01070,ATCG00080,ATCG00600,ATCG00720,ATMG00160,ATCG00520,ATCG00540,ATCG00220,ATCG00340,ATMG00580,AT2G07687,AT2G07727,ATCG00130,ATCG00470,ATCG00270,ATCG01060,ATCG00710,ATMG00070,ATMG01360,ATCG00730,ATMG01280,ATCG00430,ATCG01100,
GO:0044237	cellular metabolic process	6.54475e-07	1.39617	7602	286	AT2G33540,ATMG00650,AT3G11964,AT1G10450,AT1G10570,AT2G43900,AT1G14250,AT3G03300,AT4G02780,AT1G31950,AT1G74550,ATCG00180,AT1G54385,ATCG00500,AT3G47110,AT3G51740,ATCG00740,AT3G15520,AT5G56490,AT5G22800,ATMG00640,AT5G25980,AT1G24190,AT1G16440,AT1G61490,AT4G08990,AT2G31250,ATCG01020,AT5G59650,AT1G49340,ATCG00050,AT1G69770,ATCG00170,AT1G01040,AT5G04140,AT5G02880,ATCG00730,AT1G36160,AT1G01600,ATMG00090…
GO:0019684	photosynthesis, light reaction	0.000732248	4.96759	127	17	AT5G42270,ATCG00680,ATCG00020,ATCG00360,ATCG00580,ATCG00270,ATCG00280,ATCG01060,ATCG00080,ATCG00600,ATCG00710,ATCG00720,ATCG00730,ATCG00520,ATCG00540,ATCG00220,ATCG00340,
GO:0015979	photosynthesis	1.32421e-06	4.93495	188	25	AT5G42270,ATCG01090,ATCG00680,ATCG01010,ATCG00020,ATCG00360,ATCG00580,ATCG00280,ATCG00080,ATCG00600,ATCG00720,ATCG00300,ATCG00520,ATCG00540,ATCG00220,ATCG00440,ATCG00340,ATCG00350,ATCG00690,ATCG00270,ATCG01060,ATCG01080,ATCG00710,ATCG00730,ATCG01100,
GO:0042773	ATP synthesis coupled electron transport	0.0466734	6.95828	48	9	ATCG01010,ATMG00650,ATMG00580,ATCG01070,AT2G07687,ATMG01360,ATMG01280,ATMG00160,AT2G07727,
GO:0022904	respiratory electron transport chain	0.00422438	7.16174	57	11	ATCG01010,ATMG00650,ATMG00580,ATCG01070,AT2G07687,ATCG00720,ATMG01360,ATMG01280,ATMG00160,AT2G07727,AT2G07718,
GO:0045333	cellular respiration	0.000464268	4.84054	138	18	ATMG00650,ATMG00580,AT2G07687,AT2G07633,AT2G07727,AT2G07718,ATCG00130,ATCG01010,ATCG00470,ATCG01050,ATCG01070,ATMG00070,ATCG00720,ATMG01360,ATMG01280,ATMG00160,ATCG00430,ATCG01100,
GO:0015980	energy derivation by oxidation of organic compounds	0.00184433	4.36598	153	18	ATMG00650,ATMG00580,AT2G07687,AT2G07633,AT2G07727,AT2G07718,ATCG00130,ATCG01010,ATCG00470,ATCG01050,ATCG01070,ATMG00070,ATCG00720,ATMG01360,ATMG01280,ATMG00160,ATCG00430,ATCG01100,
GO:0006119	oxidative phosphorylation	0.0005268	7.95232	56	12	ATCG00130,ATCG01010,ATMG00650,ATCG00470,ATCG00480,ATMG00580,ATCG01070,AT2G07687,ATMG01360,ATMG01280,ATMG00160,AT2G07727,
GO:0046034	ATP metabolic process	0.00329403	4.41177	143	17	ATMG00640,ATMG00650,ATMG00580,AT2G07687,AT2G07727,ATCG00130,ATCG01010,ATCG00140,ATCG00470,ATCG00480,ATCG01070,ATMG01360,ATMG01280,ATMG01170,ATMG00160,ATCG00120,ATMG01090,
GO:0007131	reciprocal meiotic recombination	0.0232384	6.62693	56	10	AT5G52290,AT3G20475,AT1G22275,AT3G23890,AT1G22260,AT1G65010,AT4G14180,AT1G20720,AT5G48390,AT4G35520,
GO:0007127	meiosis I	0.0392656	5.51647	74	11	AT5G52290,AT3G63480,AT3G20475,AT1G22275,AT3G23890,AT1G22260,AT1G65010,AT4G14180,AT1G20720,AT5G48390,AT4G35520,
GO:1903046	meiotic cell cycle process	8.65441e-07	5.54252	154	23	AT4G21270,AT2G36850,AT2G31970,AT3G23670,AT3G23890,AT5G15540,AT5G18700,AT1G65010,AT4G22970,AT2G20635,AT5G07280,AT5G48390,AT5G52290,AT3G63480,AT3G20475,AT1G22275,AT1G22260,AT1G50240,AT4G14180,AT4G14150,AT1G02065,AT1G20720,AT4G35520,
GO:0022414	reproductive process	2.81245e-07	2.05695	1732	96	AT3G27670,AT2G36850,AT1G10570,AT3G06010,AT3G05680,AT4G15180,AT1G66730,AT3G23670,AT5G19310,AT5G18700,AT2G37260,AT4G03230,AT5G48390,AT1G14610,AT5G66460,AT2G17010,AT5G52290,AT3G63480,AT3G20475,AT4G13750,AT1G22275,AT1G20570,AT2G22125,AT3G51300,AT1G02065,AT4G35420,AT3G12810,AT5G22800,AT5G43900,AT4G21270,AT2G27170,AT5G40480,AT3G03110,AT2G31970,AT5G20490,AT3G02260,AT5G15540,AT1G65010,AT1G61490,AT5G43270…
GO:0000003	reproduction	3.21074e-07	2.04514	1742	96	AT3G27670,AT2G36850,AT1G10570,AT3G06010,AT3G05680,AT4G15180,AT1G66730,AT3G23670,AT5G19310,AT5G18700,AT2G37260,AT4G03230,AT5G48390,AT1G14610,AT5G66460,AT2G17010,AT5G52290,AT3G63480,AT3G20475,AT4G13750,AT1G22275,AT1G20570,AT2G22125,AT3G51300,AT1G02065,AT4G35420,AT3G12810,AT5G22800,AT5G43900,AT4G21270,AT2G27170,AT5G40480,AT3G03110,AT2G31970,AT5G20490,AT3G02260,AT5G15540,AT1G65010,AT1G61490,AT5G43270…
GO:0051321	meiotic cell cycle	3.76373e-08	5.67577	170	26	AT2G36850,AT1G35530,AT3G23670,AT3G23890,AT5G18700,AT4G22970,AT5G48390,AT5G52290,AT3G63480,AT3G20475,AT1G22275,AT1G20570,AT1G50240,AT4G14180,AT1G02065,AT4G35520,AT4G21270,AT2G31970,AT5G15540,AT1G65010,AT2G20635,AT5G07280,AT1G22260,AT4G14150,AT1G20720,AT5G40820,
GO:0140013	meiotic nuclear division	1.6019e-05	6.18514	108	18	AT4G21270,AT3G23670,AT3G23890,AT5G15540,AT1G65010,AT4G22970,AT2G20635,AT5G48390,AT5G52290,AT3G63480,AT3G20475,AT1G22275,AT1G22260,AT1G50240,AT4G14180,AT4G14150,AT1G20720,AT4G35520,
GO:0000280	nuclear division	1.43599e-08	5.95606	162	26	AT5G51600,AT3G54670,AT3G23670,AT3G23890,AT4G22970,AT2G32590,AT5G48390,AT5G52290,AT3G63480,AT3G20475,AT1G22275,AT1G50240,AT4G14180,AT4G35520,AT4G21270,AT5G48600,AT1G64960,AT2G27170,AT2G35630,AT5G15540,AT1G65010,AT2G20635,AT1G22260,AT4G14150,AT1G03780,AT1G20720,
GO:0048285	organelle fission	1.49478e-06	4.70674	205	26	AT5G51600,AT3G54670,AT3G23670,AT3G23890,AT4G22970,AT2G32590,AT5G48390,AT5G52290,AT3G63480,AT3G20475,AT1G22275,AT1G50240,AT4G14180,AT4G35520,AT4G21270,AT5G48600,AT1G64960,AT2G27170,AT2G35630,AT5G15540,AT1G65010,AT2G20635,AT1G22260,AT4G14150,AT1G03780,AT1G20720,
GO:0006996	organelle organization	2.6603e-11	2.3057	1690	105	AT4G02660,AT1G10450,AT3G06010,AT3G23670,AT2G36810,AT5G18700,AT3G19050,AT5G52290,AT4G18600,AT1G22275,AT2G22125,AT4G33200,AT2G28620,AT3G12810,AT5G43900,AT2G04270,AT2G38720,AT5G18410,AT1G04160,AT5G15540,AT1G24190,AT1G67230,AT1G69770,AT1G17260,AT2G20290,AT1G62750,AT3G54670,AT3G55480,AT1G67120,AT4G22970,AT2G33240,AT5G10470,AT4G14180,AT4G35520,AT1G05830,AT2G28000,AT4G32820,AT3G50240,AT2G20635,AT4G05190…
GO:0016043	cellular component organization	1.16651e-10	2.02395	2402	131	AT4G02660,AT1G10450,AT5G20860,AT3G06010,AT3G23670,AT2G36810,AT5G18700,AT3G19050,AT3G09405,AT5G66460,AT5G52290,AT4G18600,AT1G22275,AT2G22125,AT1G54385,AT4G33200,AT2G28620,AT3G12810,AT5G43900,AT2G04270,AT2G38720,AT4G05520,AT5G18410,AT1G04160,AT5G15540,AT1G24190,AT1G67230,AT1G69770,AT1G17260,AT2G20290,AT2G41210,AT2G29940,AT2G21140,AT2G45890,AT5G42270,AT1G62750,AT3G54670,AT3G55480,AT1G67120,AT3G56450…
GO:0071840	cellular component organization or biogenesis	2.20583e-08	1.83638	2809	139	AT4G02660,AT3G11964,AT1G10450,AT5G20860,AT3G06530,AT3G06010,AT3G23670,AT2G36810,AT5G18700,AT3G19050,AT3G09405,AT5G66460,AT5G52290,AT4G18600,AT1G22275,AT2G22125,AT1G54385,AT4G33200,AT2G28620,AT3G12810,AT5G43900,AT2G04270,AT2G38720,AT4G05520,AT5G18410,AT1G04160,AT5G15540,AT1G24190,AT1G67230,AT1G69770,AT1G17260,AT2G20290,AT2G41210,AT2G29940,AT2G21140,AT4G15320,AT2G45890,AT5G42270,AT1G62750,AT3G54670…
GO:0140527	reciprocal homologous recombination	0.0232384	6.62693	56	10	AT5G52290,AT3G20475,AT1G22275,AT3G23890,AT1G22260,AT1G65010,AT4G14180,AT1G20720,AT5G48390,AT4G35520,
GO:0035825	homologous recombination	0.0232384	6.62693	56	10	AT5G52290,AT3G20475,AT1G22275,AT3G23890,AT1G22260,AT1G65010,AT4G14180,AT1G20720,AT5G48390,AT4G35520,
GO:0006310	DNA recombination	0.000124792	4.7578	156	20	AT4G00020,AT1G35530,AT2G31970,AT3G23890,AT4G32700,AT5G15540,AT1G65010,AT5G48390,AT5G52290,AT3G20475,AT1G74350,AT1G22275,AT1G27880,AT1G22260,AT5G07660,AT4G14180,AT3G13782,AT1G20720,AT5G01630,AT4G35520,
GO:0006259	DNA metabolic process	0.00170662	2.73972	447	33	AT4G00020,AT5G52910,AT1G35530,AT5G45720,AT1G66730,AT3G23890,AT5G44750,AT3G03300,AT5G48390,AT5G52290,AT3G20475,AT1G74350,AT1G22275,AT1G27880,AT4G14700,AT5G07660,AT4G14180,AT3G13782,AT4G35520,AT1G08260,AT2G31970,AT2G32940,AT4G32700,AT5G15540,AT1G65010,AT5G67100,AT4G08990,AT1G69770,AT1G22260,AT5G63960,AT1G20720,AT5G01630,AT5G40820,
GO:0044260	cellular macromolecule metabolic process	0.0448935	1.38669	4389	164	AT2G33540,AT1G10450,AT1G10570,AT3G05680,AT1G10050,AT5G18700,AT3G03300,AT4G03230,AT5G52290,AT1G22275,AT3G13065,ATCG00180,AT2G22125,AT2G45920,AT5G13000,AT3G47110,AT3G51740,ATCG00740,AT3G15520,AT5G22800,AT5G15540,AT1G24190,AT1G16440,AT1G61490,AT3G18090,AT4G08990,ATCG01020,AT5G59650,AT1G49340,ATCG00050,AT1G69770,ATCG00170,AT1G01040,AT1G53440,AT1G72540,AT5G02880,AT1G09600,ATMG00090,AT5G42270,AT1G62750…
GO:0043170	macromolecule metabolic process	0.0138387	1.35456	5452	199	AT2G33540,AT3G11964,AT1G10450,AT5G20860,AT1G10570,AT5G55720,AT3G03300,ATCG00180,AT1G54385,AT3G47110,AT3G51740,ATCG00740,AT3G15520,AT5G22800,AT1G24190,AT1G16440,AT1G61490,AT4G08990,ATCG01020,AT5G59650,AT1G49340,ATCG00050,AT1G69770,ATCG00170,AT1G01040,AT5G02880,ATMG00090,AT5G52910,AT5G51820,AT4G23260,AT4G21400,AT1G67120,AT4G22970,AT3G23730,AT1G29720,AT5G63930,ATCG00040,AT4G36690,ATCG00160,AT1G76630…
GO:0090304	nucleic acid metabolic process	0.0425832	1.68387	1697	77	AT3G11964,AT3G06530,AT3G05680,AT5G45720,AT1G66730,AT5G44750,AT3G23990,AT3G03300,AT5G48390,AT1G14610,AT5G52290,AT3G20475,AT1G74350,AT1G22275,AT1G27880,ATCG00180,AT1G54385,AT3G13782,ATCG00740,AT2G42330,AT5G22800,AT2G04270,AT1G80070,AT2G31970,AT2G32940,AT1G24706,AT5G15540,AT1G65010,AT3G18090,AT5G67100,AT4G08990,AT4G04350,AT5G16715,AT1G69770,ATCG00170,AT1G01040,AT2G04860,AT3G48110,AT2G28450,AT5G01630…
GO:0034641	cellular nitrogen compound metabolic process	0.00169725	1.5836	2859	122	AT3G11964,AT3G06530,AT3G05680,AT1G14250,AT3G03300,AT5G52290,AT1G74550,AT1G22275,ATCG00180,AT1G54385,ATCG00500,ATCG00740,AT5G22800,AT2G04270,ATMG00640,AT5G15540,AT3G18090,AT4G08990,AT2G31250,ATCG01020,ATCG00050,AT1G69770,ATCG00170,AT1G01040,AT1G36160,AT2G28450,ATMG00090,AT1G62750,AT5G52910,AT5G19210,AT1G67120,AT3G57660,ATCG00040,AT4G36690,ATCG00160,AT1G76630,AT5G51660,AT4G14180,ATMG01170,AT4G35520…
GO:0045132	meiotic chromosome segregation	0.00998697	6.47967	63	11	AT5G52290,AT3G63480,AT3G20475,AT1G22275,AT3G23890,AT1G22260,AT5G15540,AT4G14180,AT4G22970,AT2G20635,AT5G48390,
GO:0098813	nuclear chromosome segregation	3.26456e-05	6.30884	100	17	AT5G48600,AT1G64960,AT2G27170,AT3G54670,AT3G23890,AT5G15540,AT4G22970,AT2G20635,AT2G32590,AT5G48390,AT5G52290,AT3G63480,AT3G20475,AT1G22275,AT1G22260,AT5G07660,AT4G14180,
GO:0007059	chromosome segregation	0.000128375	5.68364	111	17	AT5G48600,AT1G64960,AT2G27170,AT3G54670,AT3G23890,AT5G15540,AT4G22970,AT2G20635,AT2G32590,AT5G48390,AT5G52290,AT3G63480,AT3G20475,AT1G22275,AT1G22260,AT5G07660,AT4G14180,
GO:0090626	plant epidermis morphogenesis	0.00147394	5.83766	89	14	AT3G01140,AT5G23940,AT5G20490,AT5G18410,AT1G03060,AT2G20875,AT1G34245,AT5G62230,AT1G80080,AT1G71866,AT1G17580,AT1G05230,AT1G04110,AT5G43900,
GO:0009653	anatomical structure morphogenesis	0.00019907	2.27547	897	55	AT3G55500,AT5G51600,AT5G24740,AT3G06010,AT5G19310,AT1G27370,AT5G18700,AT1G80080,AT1G75120,AT5G60880,AT2G22125,AT1G77460,AT3G51300,AT2G28620,AT4G35420,AT3G12810,AT5G43900,AT3G03110,AT5G20490,AT5G18410,AT3G02260,AT1G04160,AT1G16440,AT5G67100,AT1G01040,AT1G17580,AT2G20290,AT1G04110,AT2G41210,AT1G36160,AT2G29940,AT2G46020,AT2G45890,AT3G01140,AT2G28290,AT1G03060,AT3G04690,AT1G34245,AT4G22970,AT1G71866…
GO:0048856	anatomical structure development	0.000429469	1.61862	2843	124	AT3G11964,AT1G10570,AT3G06010,AT3G05680,AT4G15180,AT3G23670,AT5G18700,AT5G66460,AT1G73220,AT1G75120,AT5G60880,AT2G22125,AT1G79840,AT2G28620,AT5G33370,AT3G12810,AT5G22800,AT5G43900,AT5G40480,AT5G18410,AT1G04160,AT5G15540,AT1G16440,AT1G69770,AT1G17260,AT1G01040,AT2G20290,AT2G41210,AT1G36160,AT2G29940,AT2G45890,AT1G62750,AT3G01140,AT1G34245,AT1G67120,AT4G22970,AT1G71866,AT5G11320,AT1G05830,AT2G04030…
GO:0032502	developmental process	0.00151187	1.57207	2998	127	AT3G11964,AT1G10570,AT3G06010,AT3G05680,AT4G15180,AT3G23670,AT5G18700,AT5G66460,AT1G73220,AT1G75120,AT5G60880,AT2G22125,AT1G79840,AT2G28620,AT5G33370,AT3G12810,AT5G22800,AT5G43900,AT5G40480,AT5G18410,AT1G04160,AT5G15540,AT1G16440,AT1G69770,AT1G17260,AT1G01040,AT2G20290,AT2G41210,AT1G36160,AT2G29940,AT2G45890,AT1G62750,AT3G01140,AT1G34245,AT1G67120,AT1G32583,AT4G22970,AT1G71866,AT5G11320,AT1G05830…
GO:0090558	plant epidermis development	0.00789674	3.20883	266	23	AT3G01140,AT5G23940,AT3G06120,AT5G20490,AT5G18410,AT1G03060,AT1G04160,AT3G27920,AT2G20875,AT1G34245,AT1G16440,AT5G62230,AT1G80080,AT1G71866,AT1G75120,AT5G60880,AT1G17580,AT5G53210,AT1G05230,AT2G20290,AT1G04110,AT2G45890,AT5G43900,
GO:0007015	actin filament organization	0.0108985	5.24392	92	13	AT5G20490,AT5G18410,AT1G04160,AT4G27370,AT3G58160,AT2G33240,AT1G17580,AT1G08730,AT4G33200,AT3G51300,AT2G20290,AT2G29890,AT5G43900,
GO:0097435	supramolecular fiber organization	0.000113355	4.78849	155	20	AT5G51600,AT2G38720,AT2G35630,AT5G20490,AT5G18410,AT1G04160,AT1G11160,AT4G27370,AT3G58160,AT2G33240,AT1G20570,AT1G17580,AT2G22125,AT1G08730,AT4G33200,AT3G51300,AT2G20290,AT2G28620,AT2G29890,AT5G43900,
GO:0030036	actin cytoskeleton organization	0.00778414	4.99569	104	14	AT5G20490,AT5G18410,AT1G04160,AT4G27370,AT3G58160,AT2G33240,AT4G18600,AT1G17580,AT1G08730,AT4G33200,AT3G51300,AT2G20290,AT2G29890,AT5G43900,
GO:0007010	cytoskeleton organization	5.4658e-08	4.32741	283	33	AT5G51600,AT3G23670,AT1G11160,AT5G18700,AT3G19050,AT2G33240,AT4G18600,AT5G54670,AT1G20570,AT2G22125,AT4G33200,AT3G51300,AT2G28620,AT2G29890,AT5G43900,AT4G21270,AT2G38720,AT2G35630,AT5G20490,AT3G50240,AT5G18410,AT1G04160,AT4G27370,AT3G58160,AT2G20815,AT4G05190,AT2G47410,AT5G60930,AT1G17580,AT1G08730,AT2G20290,AT4G14150,AT1G03780,
GO:0000226	microtubule cytoskeleton organization	0.00459139	4.07314	164	18	AT4G21270,AT5G51600,AT2G38720,AT2G35630,AT3G23670,AT3G50240,AT1G11160,AT5G18700,AT3G19050,AT2G20815,AT4G05190,AT5G54670,AT5G60930,AT1G20570,AT2G22125,AT4G14150,AT2G28620,AT1G03780,
GO:0051276	chromosome organization	0.00248112	2.59776	500	35	AT1G10450,AT3G06010,AT3G54670,AT3G23890,AT2G28290,AT5G19310,AT3G01320,AT2G32590,AT3G63480,AT3G20475,AT1G22275,AT1G27880,AT5G07660,AT4G14180,AT3G13782,AT3G12810,AT1G05830,AT4G13570,AT5G48600,AT1G64960,AT2G27170,AT1G08060,AT4G32820,AT2G31970,AT2G32940,AT5G15540,AT1G24190,AT1G55970,AT2G20635,AT1G70060,AT1G69770,AT1G22260,AT2G46020,AT5G40820,AT5G55390,
GO:0048869	cellular developmental process	0.00888414	2.2459	694	42	AT3G01140,AT2G36850,AT1G03060,AT3G04690,AT5G18700,AT1G34245,AT1G69320,AT1G32583,AT2G37260,AT1G80080,AT1G71866,AT4G13750,AT1G75120,AT2G22125,AT1G79840,AT1G05230,AT3G51300,AT1G02065,AT4G35420,AT5G43900,AT5G23940,AT5G17020,AT3G03110,AT3G06120,AT5G20490,AT1G55350,AT5G18410,AT1G04160,AT3G27920,AT3G59530,AT2G20875,AT1G16440,AT2G39350,AT5G07280,AT5G06100,AT1G17580,AT1G08730,AT2G20290,AT2G41210,AT2G29940…
GO:0009791	post-embryonic development	8.53984e-05	1.97824	1482	79	AT3G27670,AT1G10570,AT3G06010,AT3G05680,AT4G15180,AT1G66730,AT5G19310,AT5G18700,AT2G37260,AT1G14610,AT5G66460,AT1G80080,AT3G63480,AT4G13750,AT1G74350,AT5G60880,AT2G22125,AT1G02065,AT4G35420,AT3G12810,AT5G22800,AT5G43900,AT2G27170,AT5G40480,AT5G20490,AT3G02260,AT5G15540,AT1G65010,AT5G43270,AT4G04350,AT5G16715,AT1G69770,AT1G17260,AT1G01040,AT1G17580,AT2G25660,AT1G52030,AT1G04110,AT3G48110,AT1G36160…
GO:0007275	multicellular organism development	0.000171271	1.70538	2459	113	AT3G11964,AT1G10570,AT3G06010,AT3G05680,AT4G15180,AT3G23670,AT5G18700,AT5G66460,AT1G73220,AT1G75120,AT5G60880,AT2G22125,AT5G33370,AT3G12810,AT5G22800,AT5G43900,AT5G40480,AT1G04160,AT5G15540,AT1G16440,AT1G69770,AT1G17260,AT1G01040,AT2G20290,AT1G36160,AT2G29940,AT2G45890,AT1G62750,AT3G01140,AT1G34245,AT1G67120,AT4G22970,AT1G71866,AT5G11320,AT1G05830,AT2G04030,AT2G28000,AT3G26790,AT1G08260,AT5G46880…
GO:0032501	multicellular organismal process	2.06741e-05	1.70593	2741	126	AT3G11964,AT1G10570,AT3G06010,AT3G05680,AT4G15180,AT3G23670,AT5G18700,AT4G03230,AT5G66460,AT1G73220,AT1G75120,AT5G60880,AT2G22125,AT5G33370,AT3G12810,AT5G22800,AT5G43900,AT5G40480,AT1G04160,AT5G15540,AT1G16440,AT1G61490,AT1G69770,AT1G17260,AT1G01040,AT2G20290,AT2G41210,AT1G36160,AT2G29940,AT2G45890,AT1G62750,AT3G01140,AT1G34245,AT1G67120,AT4G22970,AT1G71866,AT5G11320,AT1G05830,AT2G04030,AT2G28000…
GO:0048608	reproductive structure development	0.00244174	1.96776	1207	64	AT3G27670,AT1G10570,AT3G06010,AT3G05680,AT4G15180,AT1G66730,AT5G19310,AT5G18700,AT2G37260,AT1G14610,AT5G66460,AT3G63480,AT4G13750,AT2G22125,AT1G02065,AT4G35420,AT3G12810,AT5G22800,AT5G43900,AT2G27170,AT5G40480,AT5G20490,AT3G02260,AT5G15540,AT1G65010,AT5G43270,AT4G04350,AT5G16715,AT1G69770,AT1G17260,AT1G01040,AT1G17580,AT2G25660,AT1G52030,AT3G48110,AT1G36160,AT2G02560,AT2G28290,AT1G03060,AT4G02280…
GO:0061458	reproductive system development	0.00248992	1.96451	1209	64	AT3G27670,AT1G10570,AT3G06010,AT3G05680,AT4G15180,AT1G66730,AT5G19310,AT5G18700,AT2G37260,AT1G14610,AT5G66460,AT3G63480,AT4G13750,AT2G22125,AT1G02065,AT4G35420,AT3G12810,AT5G22800,AT5G43900,AT2G27170,AT5G40480,AT5G20490,AT3G02260,AT5G15540,AT1G65010,AT5G43270,AT4G04350,AT5G16715,AT1G69770,AT1G17260,AT1G01040,AT1G17580,AT2G25660,AT1G52030,AT3G48110,AT1G36160,AT2G02560,AT2G28290,AT1G03060,AT4G02280…
GO:0003006	developmental process involved in reproduction	0.00334663	1.85941	1437	72	AT3G27670,AT2G36850,AT1G10570,AT3G06010,AT3G05680,AT4G15180,AT1G66730,AT5G19310,AT5G18700,AT2G37260,AT1G14610,AT5G66460,AT3G63480,AT4G13750,AT2G22125,AT3G51300,AT1G02065,AT4G35420,AT3G12810,AT5G22800,AT5G43900,AT2G27170,AT5G40480,AT3G03110,AT5G20490,AT3G02260,AT5G15540,AT1G65010,AT5G43270,AT4G04350,AT5G16715,AT1G69770,AT1G17260,AT1G01040,AT1G17580,AT2G25660,AT1G52030,AT2G41210,AT3G48110,AT1G36160…
