# Supplementary material for: Differential Regulation of the Ribosomal Association of mRNA Transcripts in an Arabidopsis Mutant Defective in Jasmonate-Dependent Wound Response
Source: Front Plant Sci. 2021 Mar 11;12:637959. doi: 10.3389/fpls.2021.637959 (PMC7990880; doi:10.3389/fpls.2021.637959)
Supplement: Supplementary Table 4 — Transcript abundance difference between Wt and b1b3 in the total and TRAP RNA pools. [file Table_4.XLSX]

## Sheet: Suppl Table S4
Supplementary Table S4. Transcript abundance difference between WT and b1b3 in the total and TRAP RNA pools.
b1b3_U / WT_U					b1b3_W / WT_W					b1b3_U_TRAP vs. WT_U_TRAP					b1b3_W_TRAP / WT_W_TRAP
geneID	log2 FC	pval	-log10 pval		geneID	log2 FC	pval	-log10 pval		geneID	log2FC	pval	-log10 pval		geneID	log2 FC	pval	-log10 pval
AT5G60460	-4.8395	8.0797e-71	70.0926		AT5G60480	-6.57427	0.00025509	3.59331		AT3G21680	-5.31199	1.3705e-05	4.86312		AT4G11210	-5.64772	8.2803e-05	4.08195
AT2G05914	-4.14347	2.7723e-07	6.55716		AT5G60460	-5.14299	1.1424e-132	131.942		AT2G46770	-4.92744	0.00030654	3.51351		Novel00096	-5.55371	6.4486e-07	6.19053
Novel00096	-4.13984	1.6322e-36	35.7872		Novel00096	-4.40645	2.4479e-25	24.6112		AT2G05914	-4.48044	3.8646e-12	11.4129		AT5G49615	-5.27018	5.6489e-05	4.24804
Novel00015	-2.95723	5.5226e-42	41.2579		AT2G05914	-4.35842	1.1668e-08	7.933		AT1G12070	-4.43651	0.0046121	2.3361		AT5G60460	-5.02545	2.3394e-221	220.631
AT5G60470	-2.37744	9.4836e-09	8.02303		Novel00015	-3.31111	8.1711e-30	29.0877		AT1G67110	-4.40529	1.6362e-05	4.78616		AT4G20240	-4.98569	0.0001011	3.99525
AT4G17470	-2.01167	6.63e-05	4.17849		AT5G46830	-2.24608	2.3011e-05	4.63806		AT5G38020	-4.18199	1.2014e-05	4.92031		AT3G61120	-4.98247	0.00026663	3.57409
AT2G01008	-1.66183	1.0105e-12	11.9955		AT3G30720	-2.13295	1.9732e-18	17.7048		AT4G35390	-4.16447	0.006767	2.1696		AT4G31615	-4.93561	0.0022619	2.64553
AT2G08735	-1.54576	0.00014528	3.83779		AT4G28700	-2.10823	4.8591e-05	4.31344		AT3G30530	-4.14006	4.5365e-06	5.34328		AT3G12955	-4.70332	0.0020675	2.68455
AT1G14250	-1.5078	5.7337e-10	9.24157		AT5G54585	-2.09883	0.00018214	3.73959		AT3G30340	-3.98472	2.6663e-10	9.57409		AT1G12070	-4.66372	0.00080719	3.09302
AT4G04223	-1.42668	2.8356e-17	16.5474		AT1G14250	-2.05538	5.9237e-12	11.2274		AT3G02493	-3.97689	0.00096057	3.01747		AT2G06200	-4.58596	0.005115	2.29115
AT3G06655	-1.2043	9.5636e-06	5.01938		AT1G56650	-1.95258	4.0082e-09	8.39705		AT2G43660	-3.88176	0.0013609	2.86617		AT2G47360	-4.45427	0.0064357	2.1914
AT3G05590	-1.20257	1.1333e-35	34.9457		Novel00103	-1.91814	9.3168e-05	4.03073		AT5G26730	-3.84201	0.0010066	2.99714		AT2G23060	-4.44405	0.0048988	2.30991
AT4G15210	-1.0937	1.4801e-08	7.82971		AT2G39250	-1.81375	3.7918e-07	6.42115		AT5G66940	-3.83873	0.0021754	2.66246		AT5G16230	-4.31376	0.0048648	2.31294
AT1G73325	-1.07015	9.3534e-07	6.02903		AT1G73325	-1.7276	2.8459e-05	4.54578		AT3G01516	-3.76165	0.0029591	2.52884		AT5G50060	-4.30754	0.0085997	2.06552
AT1G75945	7.82593	2.7534e-95	94.5601		AT3G49580	-1.64679	0.00028857	3.53975		AT1G47271	-3.74977	9.5839e-06	5.01846		AT3G59370	-4.00784	2.4278e-12	11.6148
AT3G06955	4.39594	6.803e-15	14.1673		Novel00061	-1.51912	0.00020632	3.68546		AT1G18835	-3.65521	2.7271e-06	5.5643		AT5G19040	-3.94079	6.1928e-07	6.20811
Novel00114	2.39937	7.5298e-08	7.12322		AT3G27920	-1.43339	0.00028315	3.54798		AT5G59305	-3.62545	0.0067439	2.17109		AT2G37925	-3.92795	1.7385e-07	6.75983
AT5G44430	2.24141	5.5361e-07	6.2568		AT3G61220	-1.41152	0.00037526	3.42567		AT2G47360	-3.60561	0.00034585	3.46111		AT2G28780	-3.9219	1.6957e-13	12.7707
AT2G26020	2.17154	7.2197e-24	23.1415		AT5G44530	-1.34893	0.00014501	3.8386		AT2G35200	-3.59159	0.0041403	2.38297		AT5G43240	-3.90973	4.2642e-05	4.37016
AT3G48360	2.06041	7.5993e-06	5.11923		AT3G26290	-1.31928	0.00031836	3.49708		Novel00096	-3.58283	7.3469e-07	6.1339		AT4G37780	-3.85757	0.0015221	2.81756
AT1G11785	1.97123	3.2063e-11	10.494		AT4G17480	-1.31156	5.4533e-07	6.26334		AT4G35190	-3.53873	0.0053813	2.26911		AT2G38600	-3.75662	0.0045994	2.3373
AT2G26010	1.93373	3.1752e-06	5.49823		AT4G07995	-1.29411	2.3053e-06	5.63727		AT4G12870	-3.5379	0.0018034	2.74391		AT3G12890	-3.70947	3.9644e-11	10.4018
AT5G21940	1.89806	8.5478e-17	16.0681		AT4G06115	-1.27087	0.00017856	3.74822		AT5G49615	-3.48845	0.00077014	3.11343		AT1G23350	-3.70332	0.0058672	2.23157
AT3G05945	1.87281	5.4929e-12	11.2602		AT3G28070	-1.26619	0.00017235	3.76359		AT3G50220	-3.45314	3.6236e-07	6.44086		AT2G05914	-3.70033	1.0592e-08	7.97502
AT4G37610	1.61986	2.467e-07	6.60783		AT5G41590	-1.26548	3.5431e-05	4.45062		AT2G40470	-3.42719	0.0013134	2.8816		AT1G13600	-3.68077	2.3596e-05	4.62716
AT2G20670	1.59707	2.6536e-07	6.57616		AT3G21460	-1.24353	3.0144e-09	8.5208		AT2G36985	-3.40706	0.002499	2.60223		AT4G15248	-3.62736	5.6157e-07	6.2506
AT5G19120	1.50666	9.7043e-20	19.013		AT4G13410	-1.23856	0.00012041	3.91934		AT4G14723	-3.39933	2.354e-05	4.62819		AT1G08440	-3.58086	6.467e-06	5.1893
AT5G44420	1.48939	3.5379e-07	6.45125		AT5G07700	-1.19167	3.0214e-05	4.51979		AT1G26780	-3.39823	0.00098454	3.00677		AT4G12890	-3.57177	1.029e-05	4.98758
AT5G56550	1.36612	1.5631e-14	13.806		AT3G50280	-1.18721	1.1997e-06	5.92093		AT2G22600	-3.33386	0.00070698	3.15059		AT1G47271	-3.56478	0.00059588	3.22484
AT5G40230	1.29357	2.1846e-06	5.66063		AT2G01008	-1.15403	0.00033177	3.47916		AT1G56555	-3.29345	0.003511	2.45457		AT5G66390	-3.49465	0.0057592	2.23964
AT1G33960	1.20275	3.7333e-05	4.42791		AT5G45650	-1.14805	4.8954e-07	6.31021		AT1G15085	-3.28657	3.3139e-08	7.47966		AT4G31610	-3.48339	0.001017	2.99268
AT1G80440	1.1268	6.5889e-13	12.1812		AT1G66100	-1.12687	6.5726e-10	9.18226		AT1G13600	-3.2804	1.6404e-06	5.78505		AT3G61880	-3.48336	1.2523e-07	6.90229
AT4G17500	1.03074	0.00013091	3.88303		AT2G29170	-1.12684	2.8965e-08	7.53813		AT4G33880	-3.24501	0.0032966	2.48193		AT1G14185	-3.46262	0.00024253	3.61523
AT4G16260	1.00367	7.1138e-09	8.1479		AT4G24050	-1.11307	6.4393e-05	4.19116		AT5G38130	-3.23749	1.2656e-05	4.8977		AT5G05960	-3.44981	2.6435e-84	83.5778
AT4G32480	1.0032	1.1302e-09	8.94684		AT2G46340	-1.09729	0.00021475	3.66807		AT5G06900	-3.2374	0.0064693	2.18914		AT1G76770	-3.44076	0.0072634	2.13886
					AT1G62540	-1.08637	4.2037e-07	6.37637		Novel00015	-3.23442	1.5409e-34	33.8122		AT5G14750	-3.42371	0.0012491	2.9034
					AT4G06536	-1.08011	0.00010981	3.95936		AT5G05960	-3.17169	4.9829e-11	10.3025		AT2G34830	-3.41729	2.7653e-05	4.55826
					AT5G25880	-1.06468	0.00038797	3.4112		AT1G11500	-3.12962	0.00023885	3.62187		AT4G05430	-3.41416	5.4498e-07	6.26362
					AT4G12320	-1.05588	0.00016197	3.79057		AT2G32750	-3.12783	0.0016253	2.78907		AT4G12440	-3.35997	0.0022002	2.65754
					AT1G48260	-1.04037	8.9137e-05	4.04994		AT3G25190	-3.10719	2.7166e-07	6.56597		AT3G25190	-3.34106	3.575e-25	24.4467
					AT3G05590	-1.03166	1.5958e-08	7.79702		AT1G31050	-3.09966	0.010223	1.99042		AT5G60320	-3.33421	0.0028013	2.55264
					Novel00142	-1.02935	7.9794e-08	7.09803		AT1G07175	-3.09707	0.0010401	2.98292		AT3G49960	-3.32793	0.00039872	3.39933
					AT4G04223	-1.02056	2.3206e-06	5.6344		AT5G41470	-3.09444	2.1464e-05	4.66829		AT1G58460	-3.32418	0.0015337	2.81426
					AT1G62560	-1.01556	1.6524e-08	7.78188		AT5G13790	-3.09118	8.4161e-05	4.07489		AT4G08150	-3.31702	5.0402e-33	32.2976
					AT4G04610	-1.00614	6.0553e-05	4.21786		AT2G44745	-3.04602	2.0361e-09	8.6912		AT1G11500	-3.26489	0.00019924	3.70062
					AT2G41850	9.16356	8.0699e-05	4.09313		AT1G34440	-3.0442	3.566e-07	6.44782		AT2G29130	-3.26353	6.7947e-07	6.16783
					AT1G75945	7.49007	1.9555e-49	48.7087		AT3G01070	-3.0414	0.0071308	2.14686		AT5G59305	-3.24558	1.1728e-14	13.9308
					AT3G06955	3.75394	1.9121e-17	16.7185		AT5G44578	-3.01471	2.6332e-26	25.5795		AT1G31050	-3.2401	0.00081553	3.08856
					AT3G09922	3.38682	8.1539e-11	10.0886		AT1G68360	-2.99169	0.00018822	3.72533		AT1G31720	-3.23909	2.371e-05	4.62507
					AT3G05945	2.52354	5.7984e-35	34.2367		AT1G13130	-2.92744	0.0029079	2.53642		AT1G07373	-3.23061	1.0277e-10	9.98813
					AT1G11785	2.47713	3.67e-05	4.43533		AT3G62040	-2.92419	0.005048	2.29688		AT1G20120	-3.21504	0.0013884	2.85749
					AT4G39070	2.14428	9.0147e-15	14.045		AT1G08440	-2.91622	0.0019766	2.70408		AT5G26620	-3.20274	0.0005792	3.23717
					AT5G42900	2.05637	1.9196e-07	6.71679		AT5G12235	-2.90205	0.00024145	3.61717		AT1G10480	-3.19627	3.066e-07	6.51343
					Novel00114	1.97555	4.5347e-06	5.34345		AT1G04660	-2.87953	5.7036e-11	10.2439		AT2G03505	-3.16496	1.6604e-10	9.77979
					AT5G03545	1.69745	5.1571e-06	5.28759		AT3G59370	-2.86944	2.1524e-06	5.66708		AT1G78815	-3.16474	2.7748e-10	9.55677
					AT2G04040	1.69582	0.00040579	3.3917		AT3G62100	-2.86322	8.4857e-08	7.07131		AT1G60040	-3.15957	0.0076496	2.11636
					AT5G06570	1.67371	1.1306e-05	4.94669		AT2G23060	-2.8479	0.0064208	2.19241		AT4G06065	-3.15812	0.0017484	2.75736
					AT5G51530	1.67094	0.00017139	3.76601		AT5G25160	-2.8338	6.4268e-08	7.19201		AT5G19870	-3.14599	0.00021491	3.66774
					AT1G17665	1.57958	0.00018786	3.72617		AT2G34140	-2.83178	0.00058051	3.23619		AT4G14060	-3.139	0.0060288	2.21977
					AT3G23550	1.5598	4.0501e-09	8.39253		AT1G10480	-2.83091	0.00999	2.00043		AT3G60890	-3.13706	3.6407e-14	13.4388
					AT4G14130	1.49184	2.4825e-10	9.60511		AT4G29710	-2.82289	0.00090534	3.04319		AT3G48300	-3.13416	0.0076481	2.11645
					AT3G28510	1.43163	0.00039932	3.39868		AT1G62360	-2.82247	1.6604e-05	4.77979		AT2G04800	-3.12985	3.2248e-06	5.4915
					AT3G62150	1.42092	2.7037e-06	5.56804		AT2G37925	-2.82206	0.0043552	2.36099		AT1G10980	-3.12523	0.0099182	2.00357
					AT1G06160	1.40214	1.2022e-11	10.92		AT1G62500	-2.80981	4.6878e-09	8.32903		AT2G43660	-3.11604	0.0022292	2.65185
					AT2G02930	1.39752	9.1065e-06	5.04065		AT2G34830	-2.80612	0.0012507	2.90285		AT5G53486	-3.08761	1.2197e-46	45.9137
					AT1G67980	1.38899	0.00033521	3.47468		AT2G41300	-2.79326	1.6667e-12	11.7781		AT2G21450	-3.06248	0.00040252	3.39521
					AT1G28330	1.36795	0.00014034	3.85282		AT5G50120	-2.78184	0.00031619	3.50005		AT3G08040	-3.04845	0.0068722	2.1629
					AT3G50140	1.3522	2.6315e-06	5.5798		AT1G75620	-2.75949	5.1214e-05	4.29061		AT4G26320	-3.04262	0.00084711	3.07206
					AT4G04745	1.34944	2.4224e-07	6.61575		AT4G08150	-2.7537	1.652e-14	13.782		AT1G71692	-3.03182	0.00016145	3.79196
					AT1G22740	1.33802	8.8631e-05	4.05241		AT1G11080	-2.74987	0.00061214	3.21315		AT5G59845	-3.02482	0.0023521	2.62854
					AT5G20790	1.32427	0.00047491	3.32339		AT2G18150	-2.73824	2.9631e-06	5.52825		AT1G30515	-3.02208	7.7716e-09	8.10949
					AT3G52310	1.30962	0.00017712	3.75173		AT3G28345	-2.72012	1.2695e-21	20.8964		AT3G28570	-3.01171	0.0060442	2.21866
					AT2G28630	1.28741	1.242e-12	11.9059		AT5G51030	-2.702	0.0020172	2.69525		AT1G04660	-2.99872	1.5959e-30	29.797
					AT5G65600	1.28224	1.7344e-05	4.76085		AT1G51670	-2.69981	0.00055679	3.25431		AT3G30340	-2.9868	4.8891e-08	7.31077
					AT5G57640	1.27711	0.00030292	3.51867		AT3G45160	-2.6968	1.5316e-07	6.81485		AT5G09980	-2.98586	8.2274e-14	13.0847
					AT4G20780	1.27349	6.1468e-07	6.21135		AT5G53250	-2.69364	0.0054585	2.26293		AT3G28345	-2.97123	8.0534e-09	8.09402
					AT3G14680	1.25818	1.2249e-05	4.9119		AT1G34480	-2.68774	0.0039547	2.40289		AT4G00460	-2.97046	0.00032432	3.48903
					AT4G16260	1.25179	2.1455e-08	7.66847		AT2G05440	-2.67074	0.00282	2.54975		AT3G21460	-2.96859	7.1432e-23	22.1461
					AT1G15125	1.24549	2.2968e-05	4.63888		AT5G64910	-2.66473	8.4705e-08	7.07209		AT4G37970	-2.96228	2.0784e-20	19.6823
					AT2G18660	1.2405	1.2038e-10	9.91945		AT3G19200	-2.65831	9.3598e-06	5.02873		AT4G34600	-2.96072	1.2187e-15	14.9141
					AT3G16180	1.22024	0.00020036	3.69819		AT1G22065	-2.65609	0.0029444	2.531		AT2G40390	-2.95455	2.5068e-15	14.6009
					AT2G16660	1.20889	3.8564e-05	4.41382		AT1G19530	-2.65338	0.0001582	3.80079		AT2G22930	-2.95128	5.6069e-05	4.25128
					AT5G09470	1.20359	9.4715e-05	4.02358		AT4G02290	-2.63788	0.0018131	2.74158		AT1G08283	-2.95127	1.942e-12	11.7118
					AT1G21310	1.19709	2.3296e-05	4.63272		AT2G28780	-2.6344	4.7883e-08	7.31982		AT5G53820	-2.94103	2.0734e-10	9.68332
					AT1G02920	1.19641	1.0525e-06	5.97778		AT4G21310	-2.63193	0.0018238	2.73902		AT1G07175	-2.93972	5.2764e-07	6.27766
					AT3G55500	1.19003	6.821e-10	9.16615		AT1G58007	-2.62919	0.010354	1.98489		AT1G16060	-2.93704	3.8983e-10	9.40912
					AT5G09800	1.18573	1.3407e-06	5.87267		AT4G29270	-2.61843	1.491e-06	5.82652		AT1G27380	-2.93156	4.8375e-05	4.31538
					AT2G42040	1.18449	8.5202e-06	5.06955		AT3G57500	-2.61627	2.2891e-12	11.6403		AT5G57670	-2.92658	0.0015525	2.80897
					AT3G28580	1.18323	3.1552e-07	6.50097		AT4G13600	-2.61298	3.9981e-05	4.39815		AT3G22540	-2.92542	0.00020844	3.68102
					AT2G48030	1.17772	2.0604e-07	6.68605		AT3G03325	-2.60613	2.8769e-06	5.54108		AT3G20460	-2.92474	1.9562e-06	5.70859
					AT3G06355	1.17423	3.0766e-05	4.51193		AT1G08290	-2.60406	2.7749e-09	8.55675		AT1G75620	-2.9204	4.7145e-06	5.32656
					AT4G18250	1.15997	1.0066e-08	7.99714		AT5G60660	-2.597	4.5646e-07	6.3406		AT3G01070	-2.91695	2.6601e-05	4.5751
					AT5G39240	1.15178	0.00047814	3.32044		AT1G79760	-2.5914	4.5662e-11	10.3404		AT3G63088	-2.90867	0.0010819	2.96581
					AT5G37740	1.15121	0.00022211	3.65343		AT1G78815	-2.58745	0.0097281	2.01197		AT3G15990	-2.90828	1.2402e-09	8.90651
					AT5G61160	1.1506	7.5359e-05	4.12286		AT2G46300	-2.58664	0.00040433	3.39326		AT1G62360	-2.90578	6.3712e-34	33.1958
					AT1G61800	1.14838	0.00011892	3.92475		AT1G06420	-2.5801	8.7198e-15	14.0595		AT1G14240	-2.89862	8.2619e-05	4.08292
					AT2G38940	1.13552	0.00034307	3.46462		AT4G09820	-2.57701	1.7669e-07	6.75279		AT4G12870	-2.8967	0.0016831	2.77389
					AT5G46050	1.13197	0.00038645	3.41291		AT1G49320	-2.56542	0.00019724	3.70501		AT2G38380	-2.85988	1.156e-19	18.937
					AT3G57240	1.12701	9.1313e-06	5.03947		AT2G37610	-2.55674	0.0011179	2.9516		AT5G17260	-2.85276	4.3882e-06	5.35771
					AT3G24420	1.09331	7.6882e-07	6.11418		AT4G24265	-2.55475	5.1526e-13	12.288		AT1G70260	-2.84768	5.0384e-32	31.2977
					AT3G26200	1.08741	2.4211e-05	4.61599		AT1G79180	-2.55384	0.006401	2.19375		AT1G56555	-2.83314	0.002747	2.56114
					AT5G57480	1.07297	9.9779e-05	4.00096		AT2G38320	-2.53729	0.00014058	3.85208		AT1G20700	-2.81076	0.0092735	2.03276
					AT3G63380	1.06926	1.5248e-06	5.81679		Novel00092	-2.53657	0.0072594	2.1391		Novel00015	-2.80964	1.7252e-28	27.7632
					AT5G47590	1.06378	0.00017741	3.75102		AT1G60360	-2.53323	2.3812e-05	4.6232		AT3G62100	-2.80421	1.2886e-06	5.88988
					AT4G06746	1.05293	0.00038636	3.41301		AT4G11950	-2.5315	0.00071668	3.14467		AT5G45320	-2.8011	0.00025502	3.59343
					AT3G11402	1.04266	0.0001881	3.72561		AT1G13710	-2.5251	2.0196e-06	5.69473		AT3G27150	-2.79553	1.6482e-05	4.78299
					AT4G27970	1.03828	4.8169e-05	4.31723		AT1G67760	-2.52498	0.00030548	3.51502		AT5G44578	-2.78965	1.4019e-18	17.8533
					AT4G18253	1.03403	4.4567e-08	7.35099		AT1G08283	-2.52484	1.5284e-11	10.8158		AT3G51325	-2.778	0.00012218	3.913
					AT5G41761	1.01454	0.00028452	3.54589		AT4G20230	-2.52453	3.0598e-07	6.51431		AT5G11930	-2.77568	9.7642e-08	7.01036
					AT5G40450	1.0142	3.9769e-05	4.40046		AT5G56320	-2.52306	0.0035901	2.44489		AT3G21890	-2.76965	0.0006935	3.15895
										AT3G25130	-2.51126	2.2623e-19	18.6454		AT4G00220	-2.76928	0.00024735	3.60669
										AT1G23560	-2.5003	0.00011596	3.93569		AT2G18500	-2.76435	1.8929e-06	5.72287
										AT4G30740	-2.4981	0.0028111	2.55112		AT1G62500	-2.753	1.077e-56	55.9678
										AT1G14185	-2.49306	0.0027224	2.56505		AT5G03795	-2.7322	0.0010247	2.9894
										AT4G35970	-2.49304	2.5241e-15	14.5979		AT2G16580	-2.72997	1.4728e-06	5.83186
										AT3G23190	-2.49289	0.0011527	2.93828		AT4G24265	-2.72939	2.8056e-17	16.552
										AT5G53486	-2.491	5.814e-09	8.23552		AT5G53200	-2.72651	0.0065979	2.18059
										AT5G15265	-2.48931	0.00024043	3.61901		AT5G65320	-2.72077	1.1937e-06	5.9231
										AT4G39480	-2.48614	0.0016837	2.77374		AT3G45680	-2.70483	1.2605e-06	5.89946
										AT4G15160	-2.47493	0.00019442	3.71126		AT5G01370	-2.70449	3.2686e-24	23.4856
										AT3G47980	-2.4723	4.1086e-05	4.38631		AT5G12870	-2.70139	1.1467e-06	5.94055
										AT3G62960	-2.46904	0.00017291	3.76218		AT1G16400	-2.69624	7.004e-33	32.1547
										AT1G70880	-2.46452	1.5126e-12	11.8203		AT4G14690	-2.69429	0.00061859	3.2086
										AT2G28790	-2.44941	8.6417e-15	14.0634		AT5G46140	-2.69164	0.00023522	3.62853
										AT4G09990	-2.44791	2.9686e-06	5.52745		AT3G28600	-2.68773	2.4912e-05	4.60359
										Novel00026	-2.44426	1.3796e-06	5.86025		AT3G54260	-2.68678	4.2206e-24	23.3746
										AT4G12890	-2.44304	0.0013551	2.86803		AT3G50870	-2.68534	9.1417e-07	6.03897
										AT2G26520	-2.43979	3.112e-07	6.50696		AT2G37090	-2.67829	1.2706e-08	7.89599
										AT1G28290	-2.43934	3.7865e-09	8.42176		AT3G49330	-2.67388	9.905e-09	8.00415
										AT5G01360	-2.43594	4.2551e-05	4.37109		AT2G37880	-2.67179	2.3819e-05	4.62308
										AT3G13900	-2.43448	0.0033162	2.47936		AT3G50450	-2.66667	0.00096819	3.01404
										AT2G44000	-2.43396	0.0032859	2.48335		AT4G20230	-2.65815	9.4416e-07	6.02495
										AT3G53235	-2.42894	5.5623e-10	9.25475		AT1G10155	-2.65429	0.0011928	2.92343
										AT1G49310	-2.42684	3.3152e-08	7.47949		AT1G34440	-2.65034	0.0015273	2.81608
										AT3G53980	-2.42446	0.00027815	3.55572		AT2G18480	-2.65027	3.0157e-05	4.52061
										AT3G28420	-2.42336	2.5137e-13	12.5997		AT3G19270	-2.64798	3.7646e-11	10.4243
										AT4G05430	-2.42294	0.00010161	3.99306		AT5G40020	-2.64561	9.096e-07	6.04115
										AT1G58460	-2.42185	0.00084767	3.07177		AT1G13710	-2.63455	1.2579e-09	8.90035
										AT1G31310	-2.41688	0.0017821	2.74907		AT3G58780	-2.62611	0.006735	2.17166
										AT4G23720	-2.41246	5.4651e-06	5.2624		AT1G22220	-2.62266	1.4978e-10	9.82455
										AT2G13820	-2.40902	5.1785e-10	9.2858		AT2G47950	-2.61961	0.0015374	2.81321
										AT5G09970	-2.40818	5.0007e-05	4.30097		AT3G62960	-2.61901	7.1079e-05	4.14826
										AT1G21140	-2.40768	1.5222e-08	7.81753		AT1G61760	-2.61501	9.4353e-06	5.02524
										AT1G71930	-2.4039	0.00026411	3.57822		AT3G63110	-2.61445	7.169e-06	5.14454
										AT3G60890	-2.39879	2.6919e-10	9.56994		AT2G37900	-2.61405	1.092e-13	12.9618
										AT5G59845	-2.38143	0.0049883	2.30205		AT5G40800	-2.60974	1.044e-09	8.9813
										AT3G20450	-2.38006	3.0735e-09	8.51237		AT4G11950	-2.60447	0.0064736	2.18885
										AT4G30250	-2.37993	1.7819e-08	7.74912		AT1G79480	-2.60212	0.00045125	3.34558
										AT3G25855	-2.37872	2.7926e-05	4.55399		AT1G70880	-2.59935	9.9551e-09	8.00195
										AT3G04510	-2.37136	5.1842e-06	5.28532		AT1G80760	-2.59578	2.5341e-24	23.5962
										AT1G68430	-2.36801	4.6339e-14	13.3341		AT4G24250	-2.59452	2.5778e-10	9.58875
										AT3G12890	-2.36554	2.7494e-07	6.56076		AT4G11190	-2.58664	4.4185e-10	9.35473
										AT2G21050	-2.36425	1.3293e-17	16.8764		AT1G49320	-2.58565	3.0231e-21	20.5195
										AT1G23340	-2.35857	3.2857e-19	18.4834		AT1G13420	-2.58431	5.4503e-05	4.26358
										AT1G70470	-2.35541	9.7069e-08	7.01292		AT3G45160	-2.58321	2.9638e-66	65.5282
										AT2G01913	-2.35322	5.7491e-08	7.2404		AT3G20640	-2.57917	1.7017e-18	17.7691
										AT4G17905	-2.35254	1.1658e-08	7.93338		AT4G36620	-2.57638	1.7841e-05	4.74858
										AT3G22740	-2.34637	1.0194e-17	16.9917		AT3G58990	-2.574	2.4425e-61	60.6122
										AT5G38610	-2.33675	7.4769e-11	10.1263		AT5G63087	-2.57374	2.4105e-07	6.61789
										AT5G38280	-2.33207	1.0785e-08	7.96718		AT1G78320	-2.57261	1.7657e-08	7.75308
										AT5G08391	-2.33037	0.0065652	2.18275		AT1G34480	-2.57168	0.0010824	2.96561
										AT5G07510	-2.3299	0.0035121	2.45443		AT4G10630	-2.5713	2.1889e-08	7.65977
										AT1G27380	-2.32893	3.7004e-05	4.43175		AT3G46890	-2.56516	8.6979e-08	7.06059
										AT3G15990	-2.3274	2.1466e-16	15.6682		AT5G50010	-2.56185	2.6738e-22	21.5729
										AT2G22620	-2.32675	4.7628e-05	4.32214		AT1G22065	-2.55733	1.1086e-12	11.9552
										AT2G44690	-2.32636	0.0012565	2.90084		AT1G16410	-2.55582	1.2312e-38	37.9097
										AT4G31730	-2.32433	3.3102e-07	6.48015		AT4G22212	-2.5516	0.00055245	3.25771
										AT5G11930	-2.32038	2.8104e-17	16.5512		AT4G04610	-2.55039	3.5633e-14	13.4481
										AT4G37445	-2.31825	3.5276e-10	9.45252		AT1G19530	-2.55007	1.476e-19	18.8309
										AT2G38390	-2.31596	0.0024563	2.60972		AT2G18470	-2.54705	0.0023284	2.63294
										AT4G19050	-2.31476	2.9886e-10	9.52453		AT4G23720	-2.54687	1.3033e-07	6.88496
										AT2G45750	-2.31435	1.1731e-10	9.93066		AT1G76250	-2.54547	2.4584e-06	5.60935
										AT2G46760	-2.31167	0.00012092	3.9175		AT1G66690	-2.54393	0.0028385	2.54691
										AT5G17165	-2.30646	2.5737e-05	4.58944		AT1G11080	-2.53083	8.8032e-26	25.0554
										AT5G59360	-2.30438	2.7869e-11	10.5549		AT5G02640	-2.5234	4.1393e-10	9.38307
										AT2G45930	-2.29927	0.00069608	3.15734		AT3G49570	-2.51952	3.5173e-19	18.4538
										AT1G05770	-2.29879	2.8276e-05	4.54858		AT3G55646	-2.51674	1.1401e-36	35.9431
										AT3G45960	-2.29749	0.0026823	2.57149		AT1G31320	-2.51476	4.2133e-06	5.37538
										AT2G18500	-2.2895	4.8299e-05	4.31606		AT1G08697	-2.51458	0.0042806	2.3685
										AT3G55646	-2.28783	1.6486e-15	14.7829		AT5G35960	-2.51442	0.0017359	2.76048
										AT1G76250	-2.28555	8.1838e-05	4.08704		AT2G35310	-2.51091	0.00013512	3.86928
										AT4G31615	-2.28464	0.003483	2.45805		AT3G43190	-2.51075	1.0581e-09	8.97547
										AT2G20562	-2.283	0.00073924	3.13121		AT4G34320	-2.50465	0.0060812	2.21601
										AT2G37900	-2.27906	0.0029912	2.52415		AT3G08770	-2.4989	2.9411e-45	44.5315
										AT4G23340	-2.27812	0.00076748	3.11493		AT3G16920	-2.4988	1.6988e-23	22.7699
										AT5G01420	-2.27795	0.0056419	2.24857		AT1G01070	-2.49386	8.3722e-20	19.0772
										AT5G19600	-2.27677	9.2873e-21	20.0321		AT4G02290	-2.49281	1.0333e-22	21.9858
										AT1G30760	-2.27675	0.0025967	2.58558		AT2G13820	-2.4899	8.5597e-40	39.0675
										AT5G16490	-2.27405	5.8151e-10	9.23544		AT4G30250	-2.48944	8.6601e-24	23.0625
										AT4G37970	-2.27131	3.444e-11	10.4629		AT2G40050	-2.48589	0.0075679	2.12102
										AT1G66370	-2.26996	0.00018407	3.73502		AT3G49580	-2.48547	1.3588e-05	4.86684
										AT1G11570	-2.26737	1.4179e-05	4.84835		AT4G32780	-2.47798	5.6395e-09	8.24876
										AT2G36120	-2.26298	6.1663e-27	26.21		AT1G80520	-2.47367	2.7531e-08	7.56018
										AT5G38770	-2.2619	0.00016358	3.78627		AT5G53950	-2.46175	0.0033371	2.47663
										AT1G20990	-2.25977	1.374e-06	5.86201		AT1G62560	-2.45719	5.2128e-27	26.2829
										AT5G11540	-2.25635	1.4693e-05	4.83289		AT4G25434	-2.45701	6.4867e-16	15.188
										AT5G43240	-2.25593	0.0024676	2.60773		AT1G75550	-2.45218	1.6575e-18	17.7805
										AT1G18140	-2.25559	0.00010359	3.98468		AT5G19600	-2.44862	3.2926e-20	19.4825
										AT3G21770	-2.25188	8.4903e-06	5.07108		AT1G18880	-2.4485	6.8278e-08	7.16572
										AT5G60490	-2.24553	4.3761e-28	27.3589		AT1G63295	-2.44724	3.0063e-10	9.52197
										AT5G55680	-2.23725	0.00059424	3.22604		AT4G15150	-2.44204	6.7493e-21	20.1707
										AT3G49690	-2.23395	0.0082667	2.08267		AT2G36650	-2.44029	2.5016e-05	4.60178
										Novel00035	-2.2323	0.0015342	2.81412		AT3G03910	-2.43857	8.2304e-14	13.0846
										AT4G23690	-2.22725	3.334e-14	13.477		AT3G21770	-2.43703	2.3558e-27	26.6279
										AT1G31720	-2.22608	0.0051035	2.29213		AT1G14630	-2.42871	1.1052e-13	12.9566
										AT2G18480	-2.22586	6.404e-05	4.19355		AT5G60470	-2.42846	1.644e-08	7.7841
										AT2G27740	-2.22532	4.8884e-14	13.3108		AT3G17730	-2.42533	1.5812e-10	9.80101
										AT3G58550	-2.22509	0.00061496	3.21115		AT2G01275	-2.42467	0.0062374	2.205
										AT3G21550	-2.22244	2.3621e-13	12.6267		AT3G49070	-2.4238	0.0024246	2.61536
										AT1G13420	-2.22048	0.00018347	3.73643		AT1G78440	-2.42304	1.676e-13	12.7757
										AT3G52900	-2.2193	3.3248e-35	34.4782		AT4G13992	-2.41661	0.00015905	3.79847
										AT2G32860	-2.21537	9.3625e-45	44.0286		AT4G39720	-2.41548	1.541e-08	7.8122
										AT4G18425	-2.21308	0.00093349	3.02989		AT5G08360	-2.41421	0.0008179	3.0873
										AT1G63310	-2.21143	5.7656e-20	19.2392		AT1G77885	-2.41324	5.8176e-33	32.2353
										AT4G36570	-2.21111	1.544e-11	10.8114		AT5G23020	-2.41042	1.5613e-32	31.8065
										AT5G45540	-2.20089	8.6886e-08	7.06105		AT5G16530	-2.40781	2.8144e-05	4.55061
										AT3G13175	-2.19888	8.4789e-11	10.0717		AT1G65870	-2.40734	8.296e-10	9.08113
										AT1G33440	-2.19678	1.6872e-09	8.77283		AT2G27035	-2.40711	4.3269e-06	5.36382
										AT3G49070	-2.19529	0.0036183	2.4415		AT2G31160	-2.40362	2.8112e-10	9.55111
										AT1G08160	-2.19024	5.7477e-37	36.2405		AT2G18370	-2.40342	7.7598e-07	6.11015
										AT5G62380	-2.18475	1.2931e-05	4.88837		AT5G56720	-2.40331	6.9744e-10	9.15649
										AT5G22140	-2.18347	5.2788e-05	4.27746		AT5G40630	-2.40308	7.7221e-11	10.1123
										AT3G10080	-2.18303	4.4336e-22	21.3532		AT4G35350	-2.4012	3.9874e-28	27.3993
										AT1G05440	-2.17816	2.0493e-05	4.68839		AT2G25940	-2.40115	0.0032593	2.48688
										AT1G18250	-2.17612	2.6573e-10	9.57556		AT5G60490	-2.39748	6.6858e-28	27.1748
										AT1G04330	-2.17015	0.00040006	3.39787		AT1G47485	-2.39536	4.5586e-06	5.34117
										AT5G02090	-2.16929	2.8013e-08	7.55264		AT1G16360	-2.39451	0.0023356	2.6316
										AT1G14240	-2.16558	0.0081808	2.0872		AT5G54060	-2.39027	2.7652e-07	6.55827
										AT2G37880	-2.16263	0.0010598	2.97478		AT3G10080	-2.38913	1.8095e-44	43.7424
										AT5G19870	-2.16203	0.009928	2.00314		AT3G18280	-2.38385	5.0156e-50	49.2997
										AT2G16580	-2.15896	1.4707e-05	4.83248		AT2G37280	-2.37817	3.4757e-11	10.459
										AT1G02630	-2.15572	0.00019623	3.70723		AT2G45080	-2.37541	3.2833e-13	12.4837
										AT4G36060	-2.15523	0.0037763	2.42293		AT4G04810	-2.37215	1.8753e-27	26.7269
										AT1G66173	-2.15494	0.00016827	3.77399		AT4G40010	-2.37116	9.9959e-06	5.00018
										AT4G34600	-2.15357	1.188e-11	10.9252		AT1G23340	-2.36875	1.2807e-15	14.8926
										AT2G38160	-2.15314	4.5162e-08	7.34523		AT1G47655	-2.36359	2.7162e-09	8.56604
										AT3G54260	-2.14965	0.0001081	3.96617		AT1G51440	-2.36247	0.00028641	3.54301
										AT5G67050	-2.14668	0.00024278	3.61479		AT4G30110	-2.36234	5.2218e-08	7.28218
										AT1G12080	-2.14313	1.7182e-21	20.7649		AT3G01295	-2.3618	1.0556e-06	5.9765
										AT3G16330	-2.14086	6.605e-05	4.18013		AT2G41300	-2.35957	1.5799e-06	5.80137
										AT1G46480	-2.13822	5.9633e-14	13.2245		AT1G56430	-2.35921	1.301e-08	7.88572
										AT3G17380	-2.13699	3.3018e-12	11.4812		AT1G22340	-2.35548	5.1748e-10	9.28611
										AT5G03170	-2.13644	2.5926e-21	20.5863		AT2G33350	-2.35506	0.00016311	3.78752
										AT1G43790	-2.13641	8.7816e-06	5.05643		AT1G33440	-2.35328	1.5464e-17	16.8107
										AT4G00220	-2.13571	0.0061225	2.21307		AT2G30933	-2.35326	5.9886e-06	5.22267
										AT3G11520	-2.13455	1.115e-07	6.95273		AT3G60900	-2.35205	5.4123e-11	10.2666
										AT3G16070	-2.12955	6.3639e-05	4.19628		AT3G10880	-2.352	4.7917e-06	5.31951
										AT1G27620	-2.12737	0.0074083	2.13028		AT5G39860	-2.35078	0.0026746	2.57274
										AT3G55990	-2.12608	2.3571e-12	11.6276		AT3G19500	-2.3507	3.6226e-14	13.441
										AT1G70710	-2.12536	0.0002094	3.67902		AT4G36570	-2.34953	9.154e-28	27.0384
										AT1G02335	-2.12439	9.9174e-14	13.0036		AT1G19630	-2.34902	9.6699e-13	12.0146
										AT1G47485	-2.12276	0.00037186	3.42962		AT2G28790	-2.34822	1.8272e-46	45.7382
										AT2G37590	-2.11759	4.4693e-09	8.34976		AT1G28290	-2.3468	1.1392e-56	55.9434
										AT5G39420	-2.11631	7.9321e-05	4.10061		AT4G08300	-2.34647	5.7694e-24	23.2389
										AT3G21210	-2.11262	0.0028743	2.54147		AT4G15680	-2.34467	2.3661e-07	6.62597
										AT3G60490	-2.11183	0.0026622	2.57476		AT5G15950	-2.34199	5.8167e-07	6.23532
										AT1G24575	-2.11037	1.8747e-34	33.7271		AT5G05220	-2.34047	0.0010475	2.97985
										AT3G03776	-2.10951	0.0010795	2.96678		AT3G46880	-2.33915	7.6386e-10	9.11699
										AT1G78120	-2.10947	6.1689e-11	10.2098		AT4G36230	-2.33564	2.1386e-18	17.6699
										AT3G18280	-2.10944	2.8782e-13	12.5409		AT2G39830	-2.32909	1.1725e-08	7.93089
										AT1G68810	-2.10845	1.1528e-38	37.9382		AT3G06370	-2.3267	2.4395e-16	15.6127
										AT2G08735	-2.10681	0.00010719	3.96985		AT3G56220	-2.32655	0.0010406	2.98272
										AT4G25760	-2.10519	1.5129e-07	6.82019		AT2G36120	-2.32295	4.3366e-35	34.3629
										AT4G35350	-2.10277	6.1099e-18	17.214		AT3G29590	-2.32161	1.0403e-17	16.9828
										AT4G24250	-2.09946	7.6047e-07	6.11892		AT1G72230	-2.31666	7.1485e-33	32.1458
										AT4G36430	-2.0991	0.0073145	2.13582		AT2G26750	-2.31416	0.0065628	2.18291
										AT5G16080	-2.09851	3.3355e-06	5.47684		AT5G50800	-2.31415	1.0241e-11	10.9897
										AT3G29590	-2.09503	6.2032e-19	18.2074		AT2G37720	-2.31273	1.9083e-05	4.71935
										AT5G48060	-2.09334	2.8301e-10	9.5482		AT1G60590	-2.3088	0.00010692	3.97094
										AT3G63050	-2.09246	1.2295e-07	6.91027		AT5G26190	-2.3063	0.0028295	2.54829
										AT1G12260	-2.09157	2.5122e-06	5.59995		AT3G03325	-2.30528	2.5268e-05	4.59743
										AT5G48740	-2.09097	0.00017153	3.76566		AT1G56650	-2.30429	6.86e-20	19.1637
										AT1G75550	-2.09053	2.677e-16	15.5724		AT3G49860	-2.3042	0.0034509	2.46207
										AT5G46140	-2.08929	0.0041711	2.37975		AT1G67110	-2.30059	0.0090257	2.04452
										AT3G22415	-2.08748	1.3384e-07	6.87341		AT4G01430	-2.29157	5.9833e-07	6.22306
										AT5G51310	-2.08616	7.8486e-06	5.10521		AT1G19968	-2.28668	0.00026452	3.57754
										AT3G46890	-2.08229	0.0001654	3.78146		AT3G28150	-2.28581	0.0031271	2.50486
										AT5G56540	-2.08145	2.3912e-08	7.62138		AT1G80240	-2.28446	0.0072503	2.13964
										AT5G03510	-2.07974	7.3878e-05	4.13148		AT2G34540	-2.28321	0.00094087	3.02647
										AT2G37870	-2.07707	5.9632e-11	10.2245		AT1G11185	-2.27967	2.9584e-17	16.5289
										AT5G45970	-2.07471	0.00015453	3.81099		AT4G39480	-2.27593	0.002485	2.60467
										AT5G11990	-2.07358	1.2216e-05	4.91307		AT3G26960	-2.27577	6.2414e-38	37.2047
										AT3G51030	-2.07272	3.0098e-14	13.5215		AT2G01913	-2.27295	1.433e-09	8.84375
										AT1G72230	-2.07103	9.1697e-18	17.0376		AT1G68430	-2.27189	2.458e-09	8.60942
										AT5G05940	-2.07081	1.7751e-11	10.7508		AT5G58360	-2.27024	0.0020252	2.69353
										AT1G26760	-2.06873	5.5013e-06	5.25953		AT1G01190	-2.26393	4.4379e-20	19.3528
										AT5G25490	-2.06636	7.2013e-12	11.1426		AT5G46830	-2.26238	0.00017955	3.74581
										AT5G09980	-2.06595	3.3338e-06	5.47706		AT5G22870	-2.262	0.0011022	2.95774
										AT2G24762	-2.06587	1.0934e-37	36.9612		AT1G53163	-2.25828	5.6211e-06	5.25018
										AT4G09060	-2.06452	8.0806e-07	6.09256		AT5G12330	-2.25633	2.137e-13	12.6702
										AT3G53232	-2.06387	5.1262e-07	6.2902		AT5G50090	-2.256	1.4586e-05	4.83606
										AT3G56810	-2.06385	1.0461e-27	26.9804		AT1G18250	-2.2552	1.1038e-34	33.9571
										AT5G44550	-2.0611	4.8582e-06	5.31352		AT1G44800	-2.25468	2.5849e-35	34.5876
										AT2G30400	-2.06061	0.0026574	2.57554		AT5G16600	-2.25386	0.00020461	3.68907
										AT3G01670	-2.05695	3.3513e-50	49.4748		AT5G07690	-2.25153	3.3242e-22	21.4783
										AT2G29130	-2.05436	0.00020611	3.6859		AT4G18610	-2.25067	3.5237e-11	10.453
										AT1G06830	-2.05217	2.1945e-22	21.6587		AT5G43180	-2.24602	1.669e-05	4.77754
										AT4G29030	-2.05164	2.6986e-34	33.5689		AT3G53980	-2.24113	5.6935e-23	22.2446
										AT5G12330	-2.04886	2.0577e-08	7.68662		AT1G73590	-2.23893	2.7319e-21	20.5635
										AT3G51220	-2.04865	7.1003e-09	8.14872		AT2G30395	-2.23805	8.3871e-05	4.07639
										AT1G24735	-2.04849	1.8351e-10	9.73634		AT1G10640	-2.23641	1.5306e-06	5.81514
										AT1G11580	-2.04687	2.8263e-22	21.5488		AT1G04778	-2.23485	0.0038341	2.41634
										AT5G19110	-2.04524	0.00064296	3.19182		AT4G22880	-2.23387	5.1405e-17	16.289
										AT1G75720	-2.04451	7.1848e-05	4.14359		AT3G22740	-2.23277	1.174e-46	45.9303
										AT4G11190	-2.04436	0.0003198	3.49512		AT1G16070	-2.23101	4.9143e-07	6.30854
										AT5G01120	-2.04307	0.00093854	3.02755		AT1G18835	-2.22977	0.0016526	2.78183
										AT1G66380	-2.04242	0.0013304	2.87602		AT2G36985	-2.22677	0.00014653	3.83407
										AT1G47655	-2.04186	1.3706e-12	11.8631		AT5G09990	-2.22636	5.42e-10	9.266
										AT4G36230	-2.0407	3.7432e-08	7.42676		AT5G08391	-2.225	0.00080418	3.09465
										AT5G07080	-2.03966	8.0169e-11	10.096		AT3G04510	-2.22496	4.1179e-12	11.3853
										AT2G28140	-2.03943	0.00011199	3.95082		AT3G20898	-2.22426	0.00045024	3.34656
										AT5G22930	-2.03828	1.3939e-13	12.8558		AT1G11580	-2.22385	4.1896e-35	34.3778
										AT3G42725	-2.03821	3.6492e-05	4.4378		AT2G31220	-2.2236	0.0042568	2.37092
										AT1G67865	-2.03747	7.9484e-59	58.0997		AT2G30210	-2.22292	1.444e-05	4.84043
										AT4G07815	-2.03323	2.1724e-06	5.66306		AT1G08340	-2.21896	1.3086e-07	6.88319
										AT3G08770	-2.03281	2.3865e-12	11.6222		AT3G19200	-2.21535	7.0473e-09	8.15198
										AT3G57670	-2.02962	1.8951e-06	5.72237		AT5G26630	-2.21299	1.593e-08	7.79778
										AT2G04800	-2.02733	0.0068466	2.16453		AT1G67760	-2.2117	5.8408e-05	4.23353
										AT1G15760	-2.02678	1.4836e-06	5.82868		AT3G52900	-2.21062	5.1272e-25	24.2901
										AT3G16920	-2.02484	1.9711e-11	10.7053		AT2G03090	-2.20887	1.5778e-14	13.8019
										AT1G78320	-2.02369	1.9768e-09	8.70404		AT2G21050	-2.20718	9.2383e-31	30.0344
										AT5G04690	-2.02303	2.2556e-07	6.64674		AT1G70710	-2.20647	1.3488e-16	15.8701
										AT1G19830	-2.02009	0.0024029	2.61926		AT4G18640	-2.2061	5.0498e-27	26.2967
										AT3G20898	-2.01974	3.9045e-06	5.40843		AT5G03170	-2.2055	1.7338e-23	22.761
										AT4G28430	-2.01855	0.00017551	3.7557		AT3G15680	-2.20216	3.2978e-43	42.4818
										AT5G03840	-2.01604	0.00058722	3.2312		AT2G33385	-2.19997	0.00016071	3.79396
										AT4G08160	-2.01559	1.2087e-07	6.91768		AT2G46760	-2.19828	1.8473e-05	4.73346
										AT1G26450	-2.0151	1.9109e-11	10.7188		AT3G53235	-2.19731	5.1509e-06	5.28812
										AT4G37730	-2.01507	0.00095295	3.02093		AT4G28250	-2.19473	1.0912e-19	18.9621
										AT3G26760	-2.01423	1.9667e-05	4.70626		AT1G54840	-2.19037	0.00035203	3.45342
										AT5G45530	-2.01391	5.0847e-11	10.2937		AT3G02500	-2.18985	1.0913e-09	8.96206
										AT2G38380	-2.0134	0.0048274	2.31629		AT5G59510	-2.18892	2.1575e-05	4.66605
										AT5G41315	-2.01054	0.006412	2.19301		AT3G02885	-2.18799	1.5479e-08	7.81026
										AT4G18640	-2.01023	9.6775e-27	26.0142		AT5G12300	-2.18792	2.6026e-09	8.58459
										AT1G10682	-2.006	7.2519e-32	31.1395		AT3G28455	-2.18483	4.908e-09	8.3091
										AT5G40020	-2.00545	0.00014263	3.84579		AT1G78120	-2.18444	1.3588e-12	11.8668
										AT3G63088	-2.00474	0.00047592	3.32247		AT1G33340	-2.18363	4.5395e-24	23.343
										AT5G48920	-2.0021	1.8079e-10	9.74283		AT1G16530	-2.18318	1.1497e-19	18.9394
										AT1G65710	-1.99925	4.5957e-07	6.33765		AT4G16640	-2.17866	0.0013977	2.85459
										AT1G61450	-1.99878	2.025e-06	5.69357		AT1G30650	-2.17712	2.2527e-07	6.6473
										AT3G13960	-1.99869	1.3075e-06	5.88356		AT1G78370	-2.17588	2.7593e-53	52.5592
										AT2G21220	-1.99749	0.0044977	2.34701		AT2G05440	-2.17559	9.2133e-35	34.0356
										AT4G25160	-1.99666	0.0065748	2.18212		AT5G07700	-2.17496	8.5811e-15	14.0665
										AT2G26695	-1.99367	1.0952e-16	15.9605		AT4G23690	-2.17393	1.033e-18	17.9859
										AT3G47510	-1.99337	1.5117e-19	18.8205		AT1G63310	-2.17139	2.0322e-30	29.692
										AT2G28410	-1.99211	3.4725e-16	15.4594		AT1G31770	-2.17058	5.5463e-18	17.256
										AT2G47140	-1.98144	0.0072655	2.13873		AT1G73640	-2.16807	8.6212e-11	10.0644
										AT2G20362	-1.9808	1.5393e-07	6.81268		AT4G14723	-2.16794	0.0045643	2.34063
										AT4G29920	-1.97926	1.3655e-08	7.86471		AT5G52860	-2.16787	2.2591e-11	10.6461
										AT5G25090	-1.97923	1.2203e-08	7.91353		AT1G35910	-2.16442	4.1495e-09	8.382
										AT1G23530	-1.97837	1.892e-17	16.7231		AT4G21650	-2.16422	8.9556e-41	40.0479
										AT1G09470	-1.97815	1.491e-08	7.82652		AT2G19590	-2.1633	2.1106e-20	19.6756
										AT4G18610	-1.97789	5.5325e-07	6.25708		AT5G15600	-2.16244	5.4062e-06	5.26711
										AT5G12870	-1.97668	0.0011089	2.95511		AT1G15760	-2.16152	2.081e-05	4.68173
										AT4G33810	-1.97571	0.00053245	3.27372		AT1G20990	-2.16133	2.7277e-06	5.5642
										AT3G15680	-1.97499	6.9352e-29	28.1589		AT3G62930	-2.15813	3.1829e-12	11.4972
										AT5G50010	-1.97431	6.7184e-17	16.1727		AT1G60390	-2.15789	3.2431e-15	14.489
										AT4G22900	-1.97053	0.00042739	3.36918		AT1G24735	-2.15728	5.5382e-09	8.25663
										AT1G16060	-1.96798	3.0611e-07	6.51412		AT5G38770	-2.15537	8.2255e-05	4.08484
										AT5G60650	-1.96692	1.1769e-05	4.92926		AT3G19710	-2.15515	1.7013e-50	49.7692
										AT5G26630	-1.96467	8.8957e-07	6.05082		AT1G68238	-2.1548	2.2447e-15	14.6488
										AT4G18780	-1.9631	1.6577e-11	10.7805		AT3G17609	-2.15179	0.0013212	2.87903
										AT4G39410	-1.96142	6.8938e-06	5.16154		AT2G36570	-2.15128	8.2424e-30	29.0839
										AT1G07610	-1.95984	7.1142e-22	21.1479		AT1G70390	-2.14761	0.0049177	2.30824
										AT4G13992	-1.95915	0.00047952	3.31919		AT1G65860	-2.14627	1.3496e-33	32.8698
										AT3G25980	-1.9587	3.0152e-10	9.52068		AT1G04330	-2.14436	9.5874e-05	4.0183
										AT1G03020	-1.95773	5.3103e-14	13.2749		AT5G39420	-2.14353	0.0009069	3.04244
										AT3G13590	-1.95714	9.7088e-07	6.01283		AT1G49830	-2.14252	0.00033931	3.4694
										AT1G20850	-1.95586	1.9045e-36	35.7202		AT5G60660	-2.14169	1.8441e-11	10.7342
										AT3G49750	-1.95508	1.6127e-13	12.7924		AT3G01516	-2.14159	0.0075032	2.12475
										AT1G60390	-1.95418	9.5693e-06	5.01912		AT3G28420	-2.14041	2.2005e-06	5.65748
										AT3G43190	-1.95277	0.00099132	3.00379		AT2G21320	-2.14039	1.3453e-06	5.87118
										AT1G14730	-1.95167	5.0224e-05	4.29909		AT1G67750	-2.13939	1.5303e-20	19.8152
										AT3G02640	-1.95129	1.8923e-21	20.723		AT5G16080	-2.13875	2.0866e-05	4.68056
										AT2G18060	-1.95111	0.00048887	3.31081		AT1G76952	-2.13758	0.0084603	2.07261
										AT4G34160	-1.94956	7.0722e-35	34.1504		AT1G12080	-2.1375	6.9437e-44	43.1584
										AT5G56720	-1.94906	3.9331e-06	5.40527		AT1G78090	-2.13535	0.0020126	2.69624
										AT2G18380	-1.94869	6.391e-06	5.19443		AT3G14950	-2.13508	0.0099655	2.0015
										AT2G01200	-1.94665	0.0011528	2.93825		AT2G32860	-2.13349	1.0569e-44	43.976
										AT3G05620	-1.94448	7.31e-05	4.13608		AT5G48060	-2.1332	3.3889e-10	9.46994
										AT2G38620	-1.943	0.00043804	3.35849		AT1G61820	-2.13226	5.8443e-10	9.23327
										AT3G62020	-1.9424	5.1881e-16	15.285		AT1G43790	-2.13098	3.4729e-17	16.4593
										AT4G31840	-1.94198	1.6509e-08	7.78228		AT5G38610	-2.12995	3.9624e-09	8.40204
										AT3G49330	-1.94152	2.0983e-05	4.67813		AT4G13210	-2.12895	5.4468e-05	4.26386
										AT1G47840	-1.94064	2.8546e-11	10.5445		AT3G42725	-2.12883	1.6212e-05	4.79016
										AT1G75260	-1.93666	1.4225e-05	4.84695		AT3G10340	-2.12766	2.5222e-13	12.5982
										AT3G27200	-1.93406	4.8675e-22	21.3127		AT1G70130	-2.12667	0.0027997	2.55289
										AT5G60720	-1.93368	0.0003007	3.52187		AT2G18380	-2.12654	9.9573e-12	11.0019
										AT1G19840	-1.93189	1.2644e-08	7.89812		AT5G51890	-2.12649	1.8462e-23	22.7337
										AT1G14890	-1.9307	8.1759e-15	14.0875		AT2G24762	-2.12649	8.7563e-34	33.0577
										AT4G15990	-1.92698	1.3475e-09	8.87047		AT5G52600	-2.12631	0.0003832	3.41657
										AT4G14940	-1.92624	1.1968e-06	5.92198		AT5G04690	-2.12619	1.0964e-07	6.96003
										AT1G53163	-1.92559	0.0063507	2.19718		AT4G23496	-2.1249	1.0913e-06	5.96206
										AT3G20570	-1.92393	5.8135e-17	16.2356		Novel00150	-2.12315	0.0048424	2.31494
										AT3G06370	-1.92323	7.1421e-13	12.1462		AT1G08290	-2.1225	1.3929e-13	12.8561
										AT1G49830	-1.92207	0.0021478	2.66801		AT3G20450	-2.12216	2.8973e-07	6.53801
										AT2G27140	-1.92191	2.9532e-15	14.5297		AT1G02950	-2.12109	1.7412e-05	4.75915
										AT1G33800	-1.92036	1.1669e-07	6.93297		AT4G39810	-2.11887	0.00013925	3.8562
										AT5G46530	-1.92012	7.889e-15	14.103		AT5G42500	-2.11867	0.0034862	2.45765
										AT1G16530	-1.91878	1.5031e-05	4.82301		AT3G15800	-2.11857	1.3955e-07	6.85527
										AT2G48090	-1.91756	7.7776e-06	5.10915		AT5G46530	-2.11847	5.0434e-16	15.2973
										AT2G36570	-1.91754	1.1343e-21	20.9453		AT3G63050	-2.11844	1.5561e-10	9.80796
										AT5G54690	-1.91579	0.00039542	3.40294		AT4G12030	-2.11783	1.6664e-44	43.7782
										AT4G33550	-1.91558	3.0168e-17	16.5205		AT3G57670	-2.11509	1.2907e-05	4.88917
										AT4G32780	-1.91405	3.6734e-06	5.43493		AT1G45201	-2.11431	4.205e-48	47.3762
										AT5G10510	-1.91345	4.3651e-05	4.36001		AT5G64910	-2.11423	0.00091041	3.04076
										AT5G53590	-1.91325	4.1452e-27	26.3825		AT5G17220	-2.11395	1.9302e-12	11.7144
										AT5G22870	-1.91252	0.0044607	2.3506		AT1G21140	-2.11383	3.0088e-08	7.52161
										AT5G07030	-1.91175	9.5295e-10	9.02093		AT5G01790	-2.11318	1.544e-05	4.81135
										AT3G24535	-1.91008	0.00055012	3.25954		AT5G37180	-2.11296	6.1257e-10	9.21284
										AT5G63625	-1.90581	2.4465e-05	4.61145		AT5G65340	-2.11136	7.1872e-08	7.14344
										AT4G26580	-1.9028	0.0054847	2.26085		AT2G46660	-2.10983	8.5573e-06	5.06766
										AT4G24180	-1.90139	0.0064371	2.19131		AT1G49310	-2.10652	2.1811e-15	14.6613
										AT3G17730	-1.90091	1.3237e-07	6.87821		AT1G53690	-2.10566	3.0744e-06	5.51224
										AT1G76800	-1.90075	1.4313e-16	15.8443		AT3G27200	-2.10036	9.8854e-21	20.005
										AT1G29520	-1.89729	8.1757e-10	9.08748		AT3G16070	-2.09949	1.4021e-05	4.85322
										AT1G58070	-1.89526	1.1815e-13	12.9276		AT5G28490	-2.09923	6.6988e-35	34.174
										AT4G19850	-1.89323	0.00050152	3.29971		AT2G26700	-2.09871	0.00015224	3.81747
										AT3G19500	-1.88963	1.0623e-05	4.97375		AT5G23370	-2.09849	4.4266e-05	4.35393
										AT1G73550	-1.88944	0.0069421	2.15851		AT1G68810	-2.09825	3.6316e-22	21.4399
										AT1G60060	-1.88774	3.247e-15	14.4885		AT1G19840	-2.09788	1.2492e-06	5.90337
										AT5G10180	-1.88752	1.0786e-57	56.9671		AT3G44990	-2.09609	9.8556e-05	4.00632
										AT5G18970	-1.88548	1.3375e-08	7.87371		AT3G24535	-2.0957	3.0259e-05	4.51915
										AT1G58370	-1.88533	0.0041129	2.38585		AT4G17905	-2.09518	1.4257e-07	6.84597
										AT1G09812	-1.88462	1.053e-05	4.97757		AT5G54660	-2.09308	2.8879e-28	27.5394
										AT2G38080	-1.8839	3.1624e-21	20.5		AT1G32100	-2.09246	6.8463e-18	17.1645
										AT1G02950	-1.88154	0.00069188	3.15997		AT2G18150	-2.09224	1.7393e-06	5.75963
										AT4G11140	-1.88093	0.00012891	3.88971		AT5G60200	-2.09173	3.3189e-22	21.479
										AT3G18260	-1.87882	1.9519e-06	5.70954		AT1G11915	-2.08748	0.0017893	2.74732
										AT3G43430	-1.87669	4.2371e-08	7.37293		AT5G52547	-2.08704	2.2264e-05	4.6524
										AT2G20590	-1.87633	1.037e-05	4.98422		AT5G42630	-2.08411	0.009919	2.00353
										AT3G44220	-1.87631	1.6456e-07	6.78368		AT4G29150	-2.08347	0.0030126	2.52106
										AT1G61760	-1.87521	0.0004528	3.34409		AT3G23930	-2.07973	2.3745e-05	4.62443
										AT1G73630	-1.87389	2.9073e-33	32.5365		AT2G43100	-2.07708	2.8379e-47	46.547
										AT2G32487	-1.87201	0.00093641	3.02853		AT4G30980	-2.07634	1.2549e-06	5.90139
										AT1G14630	-1.86916	4.5332e-05	4.3436		AT4G02700	-2.07426	0.00077021	3.11339
										AT3G62160	-1.8688	5.0321e-07	6.29825		AT1G58070	-2.0741	1.4767e-15	14.8307
										AT2G03090	-1.8679	1.2711e-12	11.8958		AT1G07610	-2.07373	9.1601e-30	29.0381
										AT1G77885	-1.86777	1.1404e-12	11.9429		AT1G29520	-2.07247	4.1777e-32	31.3791
										AT5G47920	-1.86737	7.0936e-05	4.14913		AT5G55340	-2.07204	0.0015812	2.80101
										AT1G07367	-1.86632	0.0098899	2.00481		AT1G26450	-2.0667	1.2184e-22	21.9142
										AT3G26960	-1.86422	8.4385e-06	5.07373		AT5G65690	-2.06669	0.009985	2.00065
										AT5G05790	-1.86186	3.0127e-10	9.52104		AT5G39471	-2.06442	0.00027429	3.56179
										AT1G30110	-1.86139	3.4258e-07	6.46524		AT5G47610	-2.06395	0.002675	2.57268
										AT3G47180	-1.85919	0.00020659	3.68489		AT3G51220	-2.06263	1.0462e-08	7.98039
										AT4G40010	-1.85866	0.00082866	3.08162		AT1G08160	-2.06202	2.1184e-27	26.674
										AT1G43800	-1.85829	0.0036148	2.44192		AT5G39890	-2.06142	0.00044765	3.34906
										AT1G44800	-1.85819	1.5619e-16	15.8063		AT5G07030	-2.06062	1.2023e-43	42.92
										AT1G74458	-1.85621	3.6387e-10	9.43905		AT5G07080	-2.06059	1.7097e-14	13.7671
										AT1G73590	-1.85319	7.4352e-18	17.1287		AT2G01610	-2.06006	1.2436e-20	19.9053
										AT2G29410	-1.8523	3.0347e-05	4.51788		AT1G20870	-2.05923	5.8547e-06	5.2325
										AT1G58170	-1.85072	4.8967e-07	6.3101		AT3G27027	-2.05899	8.6547e-05	4.06275
										AT4G17030	-1.85032	1.2568e-25	24.9007		AT1G73330	-2.05816	4.0844e-21	20.3889
										AT2G18370	-1.84688	0.00055866	3.25285		AT1G76800	-2.05738	2.6757e-17	16.5726
										AT5G17260	-1.84609	0.006406	2.19341		AT2G18570	-2.0562	8.32e-31	30.0799
										AT4G09950	-1.84605	7.2781e-08	7.13798		AT3G62040	-2.05511	0.0016428	2.78442
										AT2G27035	-1.84364	4.346e-05	4.36191		AT4G18260	-2.05351	1.2363e-07	6.90788
										AT3G58350	-1.84312	2.3079e-05	4.63678		AT2G20362	-2.05311	1.4e-05	4.85387
										AT2G40530	-1.84285	5.7947e-24	23.237		AT5G44400	-2.05294	2.6993e-20	19.5687
										AT1G68230	-1.84216	5.094e-05	4.29294		AT4G28700	-2.05283	0.00085443	3.06832
										AT4G36620	-1.84196	0.00078616	3.10449		AT1G70510	-2.05163	0.00023246	3.63365
										AT2G39830	-1.84144	7.0507e-05	4.15177		AT5G10180	-2.04805	3.336e-24	23.4768
										AT4G39810	-1.84053	0.003489	2.4573		AT2G27300	-2.04797	0.00039438	3.40409
										AT2G01818	-1.83893	0.00013985	3.85434		AT5G50290	-2.04757	0.0015718	2.8036
										AT2G40320	-1.83815	2.5067e-09	8.6009		AT5G03260	-2.04581	4.0989e-16	15.3873
										AT4G17480	-1.83759	0.0002041	3.69016		AT1G09812	-2.04401	0.00020214	3.69435
										AT3G50450	-1.83455	0.0035366	2.45141		AT4G01440	-2.04305	9.3872e-13	12.0275
										AT3G03910	-1.83159	1.9669e-08	7.70622		AT4G07815	-2.03954	0.0059948	2.22223
										AT2G18570	-1.83054	8.0968e-34	33.0917		AT4G39410	-2.0394	6.8168e-15	14.1664
										AT5G55830	-1.82978	0.00043167	3.36485		AT1G12630	-2.03904	5.0766e-06	5.29443
										AT5G51890	-1.82834	2.596e-11	10.5857		AT5G45540	-2.03855	2.6163e-07	6.58231
										AT4G12580	-1.82741	7.0517e-06	5.15171		AT5G18930	-2.03848	2.8859e-07	6.53972
										AT2G34540	-1.82696	0.001544	2.81135		AT1G65910	-2.03735	2.4609e-06	5.60891
										AT4G18340	-1.82457	5.3257e-07	6.27362		AT4G29270	-2.03658	1.9158e-05	4.71765
										AT1G29380	-1.8245	3.5143e-10	9.45416		AT5G26330	-2.03616	9.0367e-19	18.044
										AT4G29080	-1.82431	4.9079e-24	23.3091		AT4G30450	-2.03584	2.3137e-20	19.6357
										AT1G08340	-1.82349	0.00020655	3.68497		AT3G54180	-2.03429	2.7175e-11	10.5658
										AT4G04810	-1.82337	5.8394e-05	4.23363		AT1G09470	-2.03415	8.3522e-08	7.0782
										AT1G16400	-1.82194	5.2574e-09	8.27923		AT1G75260	-2.02888	1.4203e-05	4.84762
										AT1G51355	-1.81955	8.784e-07	6.05631		AT5G03510	-2.02803	8.5517e-08	7.06795
										AT2G08610	-1.81934	4.6038e-11	10.3369		AT5G60650	-2.02771	0.00072462	3.13989
										AT5G23020	-1.8175	2.7988e-37	36.553		AT5G04200	-2.02755	1.0164e-10	9.99294
										AT1G22220	-1.81614	0.0068515	2.16421		AT1G60360	-2.02624	5.1296e-06	5.28992
										AT5G21910	-1.81555	0.00050087	3.30027		AT3G21550	-2.02382	8.2535e-20	19.0834
										AT5G58860	-1.81478	0.00016756	3.77583		AT5G60720	-2.02326	3.8532e-06	5.41418
										AT4G02800	-1.81403	3.3426e-13	12.4759		AT2G40900	-2.02088	4.9461e-10	9.30574
										AT3G55660	-1.81376	0.00043882	3.35771		AT2G34190	-2.01618	3.3563e-09	8.47414
										AT1G67035	-1.81318	0.0024357	2.61338		AT4G29030	-2.01527	5.7009e-28	27.2441
										AT4G36160	-1.81266	4.3435e-05	4.36216		AT5G01120	-2.01454	0.00086937	3.0608
										AT3G10880	-1.81114	2.7617e-05	4.55882		AT3G03780	-2.01399	1.0375e-15	14.984
										AT5G11100	-1.81103	0.00056351	3.2491		AT5G16350	-2.01186	5.3907e-10	9.26835
										AT4G28680	-1.81078	0.00053458	3.27199		AT5G50120	-2.0081	0.010038	1.99835
										AT5G25380	-1.81018	0.0085636	2.06734		AT5G54585	-2.00517	0.0006343	3.19771
										AT1G31770	-1.80858	1.5807e-19	18.8012		AT1G70470	-2.00412	0.00085852	3.06625
										AT5G20970	-1.80712	2.3101e-10	9.63637		AT1G54790	-2.00364	0.00031573	3.50068
										AT3G51280	-1.80696	1.4265e-11	10.8457		AT3G23290	-2.00361	1.4159e-33	32.849
										AT1G10380	-1.80629	1.4127e-16	15.85		AT1G61600	-2.00351	4.7109e-09	8.3269
										AT1G49870	-1.80532	4.5006e-10	9.34673		AT5G15120	-2.00337	4.3487e-09	8.36164
										AT1G80760	-1.80374	7.474e-17	16.1264		AT5G12970	-2.00315	1.6159e-05	4.79159
										AT4G01390	-1.80355	3.7568e-15	14.4252		AT2G38320	-1.99965	6.0807e-07	6.21605
										AT5G67550	-1.80314	0.0017266	2.76281		AT4G37445	-1.99922	2.33e-07	6.63264
										AT2G22860	-1.80311	1.5749e-11	10.8027		AT1G64260	-1.99911	0.0037012	2.43166
										AT1G67860	-1.80163	1.5748e-30	29.8028		AT3G28857	-1.9987	0.00048599	3.31337
										AT1G62480	-1.8012	3.1872e-11	10.4966		AT1G52245	-1.99836	3.2064e-08	7.49398
										AT2G01610	-1.79829	7.1582e-05	4.1452		AT4G10150	-1.99616	1.4807e-05	4.82953
										AT1G55380	-1.79819	1.4901e-07	6.82678		AT2G28580	-1.99552	6.7975e-06	5.16765
										AT4G25434	-1.79785	1.0164e-05	4.99294		AT1G18590	-1.99271	3.2644e-19	18.4862
										AT2G45490	-1.79756	0.00013937	3.85583		AT5G56540	-1.99084	9.6681e-07	6.01466
										AT4G10310	-1.79559	5.4969e-07	6.25988		AT5G19260	-1.98916	2.8865e-19	18.5396
										AT3G12750	-1.79553	1.0953e-19	18.9605		AT2G38390	-1.98779	3.7293e-06	5.42837
										AT3G21510	-1.79523	5.9262e-11	10.2272		AT5G44350	-1.9873	7.9126e-05	4.10168
										AT5G59990	-1.79486	1.4003e-09	8.85378		AT5G25490	-1.9861	1.3282e-10	9.87674
										AT3G02550	-1.79403	8.0571e-07	6.09382		AT2G47270	-1.98406	1.6031e-12	11.795
										AT5G50890	-1.79388	1.1931e-12	11.9233		AT5G59720	-1.98339	1.0176e-12	11.9924
										AT5G10170	-1.79374	3.6701e-13	12.4353		AT2G37870	-1.98318	1.1686e-08	7.93233
										AT5G45700	-1.79268	1.2742e-08	7.89476		AT5G15830	-1.98294	2.6891e-08	7.57039
										AT3G25640	-1.79254	1.4437e-07	6.84052		AT5G14890	-1.98215	3.6738e-05	4.43488
										AT3G48970	-1.79084	9.2331e-07	6.03465		AT5G59360	-1.98063	0.00014196	3.84783
										AT2G44930	-1.78861	0.00016219	3.78998		AT1G73370	-1.98036	2.3548e-13	12.628
										AT2G34530	-1.7886	2.2273e-05	4.65222		AT5G01360	-1.9795	0.00075537	3.12184
										AT1G19630	-1.78843	1.2605e-08	7.89946		AT5G26260	-1.97816	4.7574e-05	4.32263
										AT2G02130	-1.78663	3.9203e-09	8.40668		AT5G14200	-1.97585	2.7152e-43	42.5662
										AT5G04080	-1.7857	1.2728e-24	23.8952		AT4G31730	-1.97118	9.1294e-08	7.03956
										AT1G01190	-1.78516	5.5502e-06	5.25569		AT1G07367	-1.96975	0.0031767	2.49802
										AT4G22880	-1.78226	1.2233e-25	24.9125		AT1G14250	-1.96915	1.2315e-05	4.90957
										AT5G04680	-1.77883	1.2103e-07	6.91711		AT3G58550	-1.96904	0.0002586	3.58737
										AT5G17220	-1.7778	7.5867e-28	27.1199		AT3G54390	-1.96663	1.0301e-18	17.9871
										Novel00106	-1.77703	5.2571e-06	5.27925		AT4G20970	-1.96573	4.905e-06	5.30936
										AT4G01440	-1.77525	1.1337e-13	12.9455		AT2G40320	-1.96489	8.2305e-10	9.08457
										AT4G31805	-1.77396	1.7584e-06	5.75488		AT2G44450	-1.96441	0.0011595	2.93573
										AT5G01370	-1.77011	1.2523e-12	11.9023		AT3G18660	-1.96412	2.5957e-05	4.58575
										AT1G44110	-1.76961	2.9713e-12	11.5271		AT2G01950	-1.96337	2.3492e-07	6.62908
										AT2G24570	-1.76865	1.2607e-14	13.8994		AT2G29125	-1.9595	5.3316e-06	5.27314
										AT3G15650	-1.76777	1.9588e-05	4.70801		AT1G02335	-1.95926	6.5038e-19	18.1868
										AT1G10750	-1.76671	1.3628e-07	6.86557		AT2G33750	-1.95889	1.5191e-07	6.81841
										AT1G22340	-1.76661	1.0435e-09	8.98151		AT3G44220	-1.95857	1.3495e-08	7.86983
										AT5G49560	-1.76598	4.8397e-08	7.31518		AT3G22410	-1.95672	2.2588e-09	8.64612
										AT3G05858	-1.76551	0.0041651	2.38037		AT5G55680	-1.95606	0.0023109	2.63622
										AT2G18328	-1.76367	2.9311e-40	39.533		AT2G45930	-1.956	4.8958e-06	5.31018
										AT5G46115	-1.76332	0.0054576	2.263		AT4G37400	-1.95424	1.1611e-18	17.9351
										AT1G33790	-1.76316	1.0073e-06	5.99684		AT1G73040	-1.95335	2.163e-07	6.66494
										AT4G34560	-1.76189	2.0825e-33	32.6814		AT1G75580	-1.95015	0.0011197	2.9509
										AT1G06350	-1.76003	0.00079708	3.0985		AT1G06420	-1.94954	6.8343e-10	9.16531
										AT4G07960	-1.75969	2.6004e-06	5.58496		AT1G23380	-1.94868	8.3626e-08	7.07766
										AT5G02640	-1.75952	9.3713e-07	6.0282		AT2G08735	-1.94712	0.0030889	2.5102
										AT2G33400	-1.75884	7.4618e-14	13.1272		AT3G11520	-1.94675	6.5874e-09	8.18129
										AT1G65910	-1.75828	4.0786e-05	4.38949		AT3G01670	-1.94667	8.9265e-32	31.0493
										AT4G21650	-1.75791	4.8486e-07	6.31438		AT2G48090	-1.94631	0.00011756	3.92974
										AT4G27435	-1.75714	4.9947e-12	11.3015		AT5G67460	-1.9453	2.0472e-10	9.68884
										AT3G28007	-1.75699	1.6857e-12	11.7732		AT1G14190	-1.94504	1.5015e-05	4.82347
										AT4G37810	-1.756	0.0033754	2.47167		AT5G33300	-1.94323	1.1241e-09	8.9492
										AT3G56100	-1.7557	2.5416e-05	4.59489		AT5G01840	-1.94202	4.9871e-14	13.3022
										AT1G72140	-1.75475	0.0059573	2.22495		AT3G10680	-1.94112	5.6432e-07	6.24847
										AT3G13650	-1.75338	4.5789e-07	6.33924		AT3G25130	-1.93981	3.0424e-08	7.51678
										AT2G28760	-1.75301	5.3455e-19	18.272		AT5G05940	-1.9364	2.8859e-10	9.53972
										AT5G01190	-1.75259	0.0015181	2.8187		AT2G27740	-1.93615	1.8524e-10	9.73227
										AT3G10680	-1.75117	2.2275e-05	4.65218		AT1G46480	-1.93602	6.9304e-16	15.1592
										AT5G03960	-1.75074	5.3544e-06	5.27129		AT1G64625	-1.93582	0.0055511	2.25562
										AT1G77110	-1.75057	6.5977e-09	8.18061		AT3G60490	-1.93299	1.2645e-07	6.89808
										AT1G25510	-1.7504	1.1358e-06	5.9447		AT3G55990	-1.93167	1.3925e-10	9.8562
										AT5G62940	-1.75011	1.2253e-14	13.9118		AT3G22961	-1.93066	0.0034974	2.45625
										AT3G22961	-1.74877	0.0090244	2.04458		AT1G20160	-1.93044	5.1087e-14	13.2917
										AT2G42820	-1.74654	5.9367e-06	5.22645		AT2G37460	-1.93024	5.5233e-28	27.2578
										AT3G57157	-1.74646	6.406e-07	6.19341		AT3G22415	-1.93018	6.8097e-06	5.16687
										AT5G40960	-1.74627	1.8757e-06	5.72684		AT4G15670	-1.92874	0.00029179	3.53493
										AT2G25060	-1.74589	1.3714e-13	12.8628		AT4G33550	-1.92772	6.3601e-15	14.1965
										AT1G64700	-1.74473	4.3903e-06	5.35751		AT3G10190	-1.92699	1.4103e-18	17.8507
										AT1G54840	-1.74465	0.0011343	2.94527		AT2G34530	-1.92608	2.2579e-05	4.6463
										AT3G58990	-1.74382	6.0509e-10	9.21818		AT5G01190	-1.92536	0.0023504	2.62886
										AT1G64260	-1.74341	0.0021255	2.67254		AT4G28680	-1.92197	0.00021936	3.65884
										AT1G70670	-1.74324	1.719e-09	8.76472		AT4G21780	-1.92003	3.0288e-06	5.51873
										AT1G06660	-1.74175	0.00075027	3.12478		AT1G02630	-1.9181	2.2637e-05	4.64518
										AT5G44400	-1.74079	9.9246e-37	36.0033		AT2G27140	-1.91802	4.2004e-15	14.3767
										AT3G28455	-1.7402	1.82e-08	7.73993		AT1G30760	-1.91788	0.010036	1.99844
										AT2G46630	-1.73966	3.4081e-32	31.4675		AT5G67550	-1.91718	0.0010309	2.98678
										AT2G40390	-1.73965	7.8071e-12	11.1075		AT2G47870	-1.91716	6.8318e-06	5.16546
										AT4G19820	-1.73914	0.00047601	3.32238		AT3G62020	-1.91501	1.9591e-14	13.7079
										AT1G75250	-1.73837	2.0787e-20	19.6822		AT1G68230	-1.91381	7.4114e-11	10.1301
										AT3G44730	-1.73776	2.3046e-13	12.6374		AT3G51030	-1.9125	9.2395e-16	15.0344
										AT2G18196	-1.7376	8.2031e-08	7.08602		AT3G57500	-1.91246	1.8532e-05	4.73208
										AT1G02700	-1.73717	0.0094454	2.02478		AT1G14890	-1.91208	1.791e-29	28.7469
										AT1G76952	-1.73631	5.5075e-05	4.25905		AT3G02020	-1.90917	3.0391e-30	29.5173
										AT4G14020	-1.73556	1.2106e-27	26.917		AT4G36160	-1.90891	0.00050743	3.29462
										AT5G03260	-1.73456	2.9639e-08	7.52814		AT5G42780	-1.90875	8.6156e-09	8.06471
										AT3G03270	-1.73436	1.3568e-20	19.8675		AT1G10682	-1.90786	4.2183e-33	32.3749
										AT4G15960	-1.73033	6.277e-07	6.20225		AT5G17330	-1.90655	2.3682e-05	4.62558
										AT1G47670	-1.72959	1.4157e-25	24.849		AT3G24450	-1.90555	6.9536e-08	7.15779
										AT4G10630	-1.72819	1.4601e-05	4.83562		AT5G51920	-1.90543	2.5793e-06	5.5885
										AT4G01600	-1.72647	3.0774e-11	10.5118		AT3G60550	-1.90541	2.1087e-05	4.67599
										AT5G02380	-1.72574	8.7345e-16	15.0588		AT5G59990	-1.9039	1.0008e-06	5.99965
										AT5G57130	-1.72296	2.1728e-21	20.663		AT1G77110	-1.90313	3.7691e-05	4.42376
										AT4G17470	-1.72275	0.00030154	3.52066		AT4G15990	-1.90305	3.9123e-11	10.4076
										AT5G09976	-1.72273	0.0005467	3.26225		AT1G59740	-1.90262	6.8358e-09	8.16521
										AT2G32765	-1.72237	1.1937e-06	5.9231		AT3G20570	-1.90193	1.4779e-24	23.8304
										AT2G29440	-1.72112	1.7292e-06	5.76215		AT4G15160	-1.90187	5.3606e-06	5.27079
										AT5G16530	-1.71989	6.8506e-08	7.16427		AT2G43470	-1.90174	0.0061251	2.21289
										AT3G01295	-1.71958	0.00038606	3.41335		AT1G63650	-1.90032	1.5547e-06	5.80835
										AT1G31040	-1.71801	0.00011205	3.95059		AT2G46650	-1.9	5.9541e-34	33.2252
										AT1G61600	-1.71737	1.8973e-12	11.7219		AT1G25530	-1.899	7.1854e-15	14.1435
										AT1G73640	-1.71691	3.6687e-07	6.43549		AT5G49120	-1.89789	0.00026798	3.5719
										AT3G21460	-1.71656	0.00026509	3.57661		AT1G02070	-1.89488	0.0089341	2.04895
										AT5G67460	-1.71572	4.7207e-09	8.32599		AT3G16330	-1.89421	0.00030975	3.50899
										AT4G34510	-1.71547	0.0073406	2.13427		AT4G15690	-1.89325	2.5009e-14	13.6019
										AT1G28470	-1.71542	0.0079834	2.09781		AT5G10170	-1.89222	2.2607e-14	13.6458
										AT3G23290	-1.71528	1.4203e-07	6.84762		AT1G77870	-1.8902	4.9024e-07	6.30959
										AT5G07322	-1.71521	3.2797e-05	4.48417		AT2G18060	-1.89015	0.00050491	3.29679
										AT3G48185	-1.71453	2.8595e-10	9.54371		AT4G29920	-1.88892	8.6404e-10	9.06347
										AT1G28390	-1.71393	5.4078e-14	13.267		AT4G35970	-1.88758	2.9198e-10	9.53465
										AT5G60150	-1.71365	4.8863e-06	5.31102		AT1G01200	-1.88735	1.8261e-08	7.73848
										AT1G75390	-1.7117	1.9157e-09	8.71767		AT2G26695	-1.88671	8.8608e-14	13.0525
										AT5G42800	-1.71125	3.0034e-22	21.5224		AT5G25090	-1.8863	5.836e-14	13.2339
										AT5G19530	-1.70914	7.8527e-32	31.105		AT5G01330	-1.88595	0.00067327	3.17181
										AT5G48820	-1.70635	8.0051e-05	4.09663		AT4G39510	-1.8831	2.9924e-09	8.52398
										AT1G78050	-1.70621	8.4251e-07	6.07442		AT5G17300	-1.88289	2.3197e-05	4.63457
										AT4G39720	-1.70511	9.7937e-05	4.00905		AT3G06020	-1.87958	7.4465e-19	18.128
										AT5G15120	-1.70483	4.3908e-07	6.35746		AT3G45610	-1.87952	1.6037e-10	9.79488
										AT3G16490	-1.70444	0.00023075	3.63686		AT1G10750	-1.87829	1.1912e-08	7.92402
										AT5G38300	-1.70433	1.0627e-06	5.97359		AT3G62950	-1.87804	2.6913e-07	6.57004
										AT3G55370	-1.70284	2.0941e-18	17.679		AT2G40530	-1.87682	1.9102e-20	19.7189
										AT2G16850	-1.70235	1.6435e-18	17.7842		AT2G46790	-1.87667	0.006442	2.19098
										AT5G56120	-1.69619	9.0873e-09	8.04157		AT4G25160	-1.87393	0.008972	2.04711
										AT2G19590	-1.69524	1.5531e-05	4.8088		AT1G02810	-1.87357	0.0019807	2.70318
										AT3G17680	-1.69487	1.2585e-09	8.90015		AT3G23210	-1.87218	6.5388e-08	7.1845
										AT2G19920	-1.6947	0.00042889	3.36765		AT1G21440	-1.87189	3.6218e-37	36.4411
										AT2G01008	-1.69356	3.016e-12	11.5206		AT1G35830	-1.87175	1.6534e-06	5.78162
										AT5G43180	-1.69318	0.00081799	3.08725		AT1G07985	-1.87073	0.0066207	2.1791
										AT4G11550	-1.69285	0.0022866	2.64081		AT4G29700	-1.87063	4.0733e-28	27.3901
										AT2G03200	-1.69263	0.00068981	3.16127		AT2G28140	-1.8705	4.5211e-12	11.3448
										AT5G06250	-1.69212	0.00079152	3.10154		AT1G11570	-1.87011	0.00081862	3.08692
										AT5G66920	-1.69016	7.9297e-18	17.1007		AT5G36910	-1.8684	1.5844e-11	10.8001
										AT5G11620	-1.69	0.0010086	2.99628		AT1G09350	-1.86819	0.0081272	2.09006
										AT1G67780	-1.68804	0.0017896	2.74724		Novel00007	-1.86484	0.0028171	2.5502
										AT5G19100	-1.68663	3.8703e-05	4.41226		AT5G47920	-1.86354	0.00034045	3.46795
										AT1G62045	-1.68619	1.9871e-08	7.70178		AT5G07322	-1.86351	7.4931e-08	7.12534
										AT1G63520	-1.68606	0.0025588	2.59196		AT3G25717	-1.86326	7.322e-10	9.13537
										AT2G01950	-1.68518	1.8368e-19	18.7359		AT5G45530	-1.86303	2.4308e-09	8.61425
										AT1G05710	-1.68368	0.00050813	3.29403		AT1G53070	-1.86218	1.7953e-20	19.7459
										AT1G52245	-1.68225	9.6015e-05	4.01766		Novel00142	-1.86174	1.0336e-12	11.9856
										AT2G30395	-1.68171	0.0033897	2.46984		AT5G09976	-1.86066	0.00018534	3.73203
										AT1G20930	-1.67964	1.0988e-10	9.95908		AT3G22840	-1.85986	0.00080101	3.09636
										AT3G18660	-1.67903	0.00016956	3.77068		AT1G30110	-1.85959	4.3771e-13	12.3588
										AT5G09220	-1.67872	4.259e-10	9.37069		AT4G13000	-1.85916	0.00082163	3.08532
										AT1G70800	-1.6785	3.3879e-10	9.47007		AT3G48970	-1.85726	5.0842e-11	10.2938
										AT3G24450	-1.67684	1.5213e-05	4.81779		AT5G62820	-1.85558	8.6263e-07	6.06418
										AT1G73690	-1.67535	0.0073213	2.13541		AT1G16310	-1.85389	4.2006e-12	11.3767
										AT2G37280	-1.67532	0.0032029	2.49446		AT1G71870	-1.85333	2.8708e-06	5.542
										AT1G25530	-1.67378	1.2007e-05	4.92057		AT1G15085	-1.85265	0.0032453	2.48875
										AT4G01730	-1.67019	4.3654e-11	10.36		AT3G51930	-1.85264	1.5797e-10	9.80143
										AT3G12870	-1.66978	3.331e-09	8.47743		AT4G14650	-1.85165	0.0092792	2.03249
										AT1G73370	-1.66863	1.3722e-09	8.86258		AT5G02380	-1.84919	1.5154e-39	38.8195
										AT1G23460	-1.6683	4.8718e-11	10.3123		AT1G73630	-1.84902	1.1044e-17	16.9569
										AT4G04223	-1.66737	1.5598e-05	4.80693		AT1G06660	-1.84642	1.199e-05	4.92118
										AT2G41130	-1.6672	0.00011867	3.92566		AT4G19050	-1.84402	1.3918e-07	6.85642
										AT3G48770	-1.66625	0.00044698	3.34971		AT3G60720	-1.84346	9.4329e-07	6.02535
										AT5G63850	-1.66417	1.5281e-35	34.8158		AT2G24700	-1.84166	0.00092321	3.0347
										AT1G64625	-1.66392	2.0672e-05	4.68462		AT3G05140	-1.84084	1.2599e-06	5.89966
										AT1G03620	-1.66205	8.2718e-06	5.0824		AT3G13590	-1.83755	1.0718e-05	4.96989
										AT2G44300	-1.66196	9.2108e-08	7.0357		AT2G24570	-1.83747	2.4075e-24	23.6184
										AT3G23430	-1.66162	3.2448e-06	5.48881		AT3G03270	-1.83686	8.9642e-25	24.0475
										AT5G42780	-1.66145	1.9508e-12	11.7098		AT5G07800	-1.83682	6.5234e-09	8.18553
										AT3G30720	-1.66072	1.8907e-13	12.7234		AT2G44745	-1.83565	2.3279e-06	5.63304
										AT3G01940	-1.65914	1.8339e-06	5.73662		AT1G20850	-1.83524	1.8958e-26	25.7222
										AT3G20640	-1.65883	2.349e-11	10.6291		AT2G01210	-1.83361	2.4019e-05	4.61945
										AT1G32100	-1.65638	1.1348e-09	8.94508		AT2G28760	-1.83275	1.7008e-17	16.7693
										AT2G47870	-1.65637	3.8952e-07	6.40947		AT4G13195	-1.83072	3.8077e-13	12.4193
										AT2G39700	-1.6544	1.4541e-16	15.8374		AT5G10510	-1.8305	3.1229e-05	4.50544
										AT5G42630	-1.6542	0.00099936	3.00028		AT2G22122	-1.83031	7.8876e-24	23.1031
										AT2G33750	-1.65337	4.1341e-06	5.38362		AT5G42146	-1.82896	3.2961e-11	10.482
										AT2G18360	-1.65308	0.0022284	2.65201		AT4G09060	-1.82747	2.2104e-06	5.65553
										AT4G00880	-1.65173	0.0001596	3.79697		AT2G41480	-1.82659	1.1926e-07	6.92351
										AT1G09960	-1.65032	1.0885e-13	12.9632		AT1G49470	-1.82441	8.4639e-09	8.07243
										AT5G62960	-1.65022	2.4173e-08	7.61667		AT1G70670	-1.82258	9.3109e-23	22.031
										AT5G60880	-1.64727	0.00040482	3.39274		AT1G05440	-1.82047	0.00030563	3.5148
										AT4G20970	-1.64602	1.1606e-06	5.93532		AT1G15150	-1.81965	2.7836e-05	4.55539
										AT1G71870	-1.64562	4.7301e-08	7.32513		AT3G24110	-1.81764	6.3137e-06	5.19972
										AT2G32280	-1.64517	0.00020706	3.6839		AT1G64620	-1.81678	2.99e-13	12.5243
										AT1G78370	-1.64509	4.505e-11	10.3463		AT5G11540	-1.81677	8.2986e-05	4.081
										AT1G62981	-1.64482	5.4341e-06	5.26487		AT1G77700	-1.81541	2.0602e-08	7.68609
										AT5G16250	-1.6448	9.5548e-16	15.0198		AT2G19970	-1.81441	2.3368e-10	9.63138
										AT2G32870	-1.64233	4.3147e-39	38.365		AT3G13510	-1.81401	6.3098e-26	25.2
										AT3G02120	-1.64167	8.3109e-12	11.0804		AT3G03130	-1.81319	9.6385e-09	8.01599
										AT1G05370	-1.64159	0.001083	2.96537		AT3G13175	-1.81264	6.2044e-17	16.2073
										AT4G14330	-1.6398	7.5292e-09	8.12325		AT3G55515	-1.81058	0.0055067	2.25911
										AT5G18930	-1.63977	1.2132e-10	9.91607		AT3G06360	-1.81028	0.0019573	2.70834
										AT2G22122	-1.63854	6.0982e-16	15.2148		AT1G02460	-1.80894	0.0061162	2.21352
										AT4G16000	-1.63641	3.9978e-15	14.3982		AT4G28500	-1.80849	1.4467e-06	5.83962
										AT5G57500	-1.63615	0.00014326	3.84388		AT2G40610	-1.80834	0.0018235	2.73909
										AT5G15510	-1.63528	3.8198e-07	6.41796		AT5G67150	-1.80832	3.9762e-13	12.4005
										AT1G21810	-1.63513	0.0010154	2.99336		AT4G01450	-1.80761	5.2722e-27	26.278
										AT5G48690	-1.63512	0.0019378	2.71269		AT3G57130	-1.80623	0.00016683	3.77773
										AT5G06800	-1.63396	2.6169e-05	4.58221		AT3G60840	-1.80533	2.2119e-11	10.6552
										AT3G24110	-1.63339	4.8195e-06	5.317		AT1G58170	-1.80345	0.00050527	3.29648
										AT2G31160	-1.63042	3.8165e-13	12.4183		AT2G42610	-1.80185	1.5944e-21	20.7974
										AT1G64360	-1.6292	2.734e-16	15.5632		AT3G59680	-1.8011	1.08e-09	8.96658
										AT5G60200	-1.62674	1.6076e-20	19.7938		AT4G33070	-1.79897	5.9403e-06	5.22619
										AT2G22930	-1.62173	0.00035977	3.44398		AT5G56050	-1.79869	0.00014096	3.8509
										AT5G53210	-1.62166	4.1196e-05	4.38514		AT4G14040	-1.79783	2.1084e-36	35.676
										AT3G47690	-1.62165	7.7081e-07	6.11305		AT5G07460	-1.7975	9.9416e-35	34.0025
										AT1G35310	-1.62118	4.6126e-15	14.3361		AT5G02090	-1.79633	4.2982e-06	5.36671
										AT4G15830	-1.6198	3.4008e-12	11.4684		AT2G37390	-1.79522	4.4838e-08	7.34835
										AT5G28490	-1.61886	2.3415e-08	7.63051		AT4G18550	-1.79385	0.0098266	2.0076
										AT3G60840	-1.61781	1.992e-09	8.70071		AT2G31380	-1.79366	0.0020912	2.6796
										AT1G26820	-1.6177	1.1151e-07	6.95269		AT2G38080	-1.79117	5.0833e-18	17.2939
										AT3G62930	-1.61652	6.7371e-07	6.17153		AT5G20420	-1.79101	3.9723e-06	5.40096
										AT5G46730	-1.61549	1.2064e-05	4.91851		AT5G43630	-1.78933	0.0032947	2.48218
										AT1G23380	-1.61547	0.00022585	3.64618		AT3G14560	-1.78878	2.4762e-14	13.6062
										AT1G65500	-1.61542	5.3212e-05	4.27399		AT5G11260	-1.78731	1.1728e-05	4.93078
										AT5G52547	-1.61523	6.7904e-05	4.1681		AT2G16740	-1.7848	1.6532e-24	23.7817
										AT2G01660	-1.61444	2.4316e-16	15.6141		AT2G42800	-1.78459	4.8571e-07	6.31362
										AT5G42210	-1.61339	0.0057419	2.24094		AT3G18670	-1.78362	0.003373	2.47198
										AT1G16070	-1.61228	0.00015116	3.82056		AT1G65710	-1.78345	3.8499e-05	4.41455
										AT5G04200	-1.61191	0.0010989	2.95904		AT3G25855	-1.78233	0.0032884	2.48302
										AT4G14650	-1.60938	4.183e-05	4.37851		AT3G22550	-1.77974	4.8187e-17	16.3171
										AT1G20160	-1.60822	1.1505e-17	16.9391		AT2G28315	-1.77959	1.792e-05	4.74666
										AT5G04890	-1.60815	5.492e-10	9.26027		AT5G42720	-1.77937	3.0602e-23	22.5143
										AT5G39240	-1.60633	2.9215e-07	6.53439		AT5G05790	-1.77712	8.5297e-10	9.06907
										AT1G35910	-1.6056	2.7015e-06	5.5684		AT1G18370	-1.7749	1.9477e-08	7.71048
										AT3G45680	-1.6043	2.7418e-05	4.56196		AT5G66300	-1.77441	2.3088e-07	6.63661
										AT5G12970	-1.60413	0.0040701	2.39039		AT1G62870	-1.77281	3.2832e-09	8.4837
										AT5G37180	-1.60359	6.2243e-06	5.20591		AT4G17030	-1.77262	1.037e-20	19.9842
										AT2G03500	-1.60285	3.5011e-11	10.4558		AT2G31790	-1.77192	2.4599e-07	6.60908
										AT3G59680	-1.60279	7.1507e-09	8.14565		AT1G24575	-1.77094	2.4107e-19	18.6179
										AT5G26330	-1.59887	1.7784e-14	13.75		AT5G17420	-1.77057	3.7421e-11	10.4269
										AT3G24770	-1.59839	2.4566e-22	21.6097		AT1G67865	-1.77027	5.4633e-20	19.2625
										AT2G33385	-1.59802	0.0099457	2.00236		AT3G54040	-1.77008	0.00032681	3.4857
										AT5G06150	-1.59781	4.6536e-08	7.33221		AT3G20260	-1.76983	1.3111e-15	14.8824
										AT3G04030	-1.59739	2.1225e-13	12.6732		AT4G25760	-1.76881	7.9126e-05	4.10168
										AT5G50090	-1.59721	1.6659e-05	4.77835		AT3G53190	-1.76867	1.1536e-26	25.9379
										AT2G05910	-1.59648	0.0022192	2.6538		AT3G13650	-1.76862	7.9889e-16	15.0975
										AT5G01340	-1.59631	5.1867e-08	7.28511		AT4G13540	-1.76705	7.2627e-11	10.1389
										AT5G64080	-1.59581	4.1624e-06	5.38066		AT5G62940	-1.76412	1.7494e-12	11.7571
										AT1G02900	-1.59554	1.3745e-05	4.86186		AT1G67035	-1.76412	0.0032953	2.48211
										AT5G37950	-1.59544	5.2404e-08	7.28064		AT1G76240	-1.76365	0.00013866	3.85805
										AT3G45610	-1.59528	6.0896e-08	7.21541		AT2G03200	-1.76193	0.00030709	3.51273
										AT1G19540	-1.59096	0.00013174	3.88028		AT2G21560	-1.76179	2.3831e-07	6.62286
										AT3G15400	-1.59013	1.1073e-14	13.9557		AT5G22390	-1.76088	1.117e-24	23.9519
										AT1G11740	-1.58853	0.0028667	2.54262		AT3G47180	-1.76081	9.6623e-05	4.01492
										AT1G29160	-1.5876	1.3062e-07	6.88399		AT5G06720	-1.76042	8.9344e-07	6.04893
										AT4G30450	-1.58745	6.9583e-19	18.1575		AT2G25060	-1.75873	2.0355e-22	21.6913
										AT4G15680	-1.58611	0.0042982	2.36671		AT5G48920	-1.75872	5.7099e-08	7.24337
										AT4G39700	-1.58578	0.0070302	2.15303		AT3G25980	-1.75823	5.6897e-16	15.2449
										AT3G21600	-1.58557	1.5472e-06	5.81045		AT3G05620	-1.75744	3.0966e-05	4.50911
										AT3G51720	-1.58531	5.4288e-13	12.2653		AT5G37660	-1.7564	2.9055e-13	12.5368
										AT2G27970	-1.58495	6.4759e-22	21.1887		AT4G17470	-1.7552	0.0050439	2.29723
										AT3G19710	-1.58475	2.0222e-08	7.69418		AT2G23950	-1.7546	1.2284e-10	9.91066
										AT5G66230	-1.58376	1.5939e-06	5.79754		AT1G16330	-1.75306	0.00014732	3.83174
										AT4G21780	-1.58366	7.5563e-06	5.12169		AT4G29080	-1.75231	3.8777e-30	29.4114
										AT5G07800	-1.58337	4.7216e-07	6.32591		AT3G04030	-1.75035	0.0057453	2.24069
										AT3G06020	-1.58185	0.0048378	2.31535		AT5G18970	-1.74914	1.1973e-15	14.9218
										AT5G02460	-1.58136	0.00026637	3.57451		AT4G10310	-1.74891	3.4139e-06	5.46675
										AT1G01200	-1.58104	2.8719e-07	6.54183		AT4G31330	-1.74881	1.6059e-07	6.79428
										AT3G56240	-1.58026	6.725e-14	13.1723		AT3G47400	-1.74868	0.0008593	3.06586
										AT5G55340	-1.57653	0.0031653	2.49959		AT4G14940	-1.74708	4.9354e-06	5.30668
										AT1G73850	-1.5764	6.8428e-10	9.16477		AT2G25680	-1.74493	6.949e-08	7.15808
										AT3G09070	-1.57632	2.2107e-17	16.6555		AT3G25640	-1.74489	3.0749e-07	6.51217
										AT2G15310	-1.57527	2.917e-09	8.53506		AT1G74890	-1.7442	7.5066e-09	8.12456
										AT3G54040	-1.57502	0.00027529	3.56021		AT3G51720	-1.74329	2.8754e-15	14.5413
										AT3G12145	-1.57482	1.3424e-07	6.87212		AT4G02800	-1.74317	5.0723e-12	11.2948
										AT3G51060	-1.57361	0.00065674	3.18261		AT1G73325	-1.74199	7.1312e-05	4.14684
										AT4G16008	-1.57276	3.2799e-23	22.4841		AT5G61420	-1.74124	3.5352e-15	14.4516
										AT1G59740	-1.57269	1.9934e-09	8.70041		AT4G23410	-1.74112	1.6631e-06	5.77908
										AT4G18260	-1.57246	0.00016127	3.79245		AT4G16000	-1.74072	5.5501e-11	10.2557
										AT2G45080	-1.5692	3.0079e-11	10.5217		AT3G03200	-1.74002	0.002445	2.61172
										AT3G53190	-1.5689	2.1516e-19	18.6672		AT2G39850	-1.73815	1.2296e-13	12.9102
										AT5G17450	-1.56848	1.1514e-09	8.93877		AT3G05980	-1.73809	1.436e-12	11.8428
										AT2G42800	-1.56821	1.5813e-06	5.80099		AT1G79760	-1.73794	1.6758e-05	4.77578
										AT5G52860	-1.56677	1.0289e-06	5.98763		AT3G16450	-1.73702	1.1701e-13	12.9318
										AT4G17000	-1.56524	5.5916e-07	6.25246		AT1G70270	-1.73651	0.001809	2.74256
										AT1G76540	-1.56491	1.0856e-08	7.96433		AT5G60020	-1.73589	1.473e-05	4.8318
										AT5G27690	-1.56293	4.9268e-18	17.3074		AT3G47980	-1.73257	8.6559e-07	6.06269
										AT2G29710	-1.56256	8.962e-07	6.0476		AT2G29660	-1.73196	7.7133e-09	8.11276
										AT1G75580	-1.56092	1.5377e-07	6.81313		AT4G39190	-1.73097	6.285e-11	10.2017
										AT4G15660	-1.55919	5.8738e-10	9.23108		AT5G21960	-1.72737	8.8354e-17	16.0538
										AT3G27150	-1.55899	0.0061586	2.21052		AT5G41470	-1.7273	0.0054306	2.26515
										AT5G18690	-1.55899	8.0064e-20	19.0966		AT2G01660	-1.72523	7.519e-16	15.1238
										AT5G15630	-1.5589	1.0652e-07	6.97257		AT2G44930	-1.72477	2.235e-06	5.65072
										AT3G12730	-1.55868	1.6774e-07	6.77536		AT5G54470	-1.72473	0.0061015	2.21456
										AT1G17400	-1.55844	0.0099144	2.00373		AT1G71830	-1.72376	7.0588e-05	4.15127
										AT5G45350	-1.55759	1.2813e-40	39.8923		AT2G47180	-1.72295	2.4e-25	24.6198
										AT4G01450	-1.55755	4.2155e-22	21.3752		AT4G06744	-1.72204	7.3038e-07	6.13645
										AT3G18670	-1.5562	0.010103	1.99555		AT3G21240	-1.72167	3.1344e-16	15.5038
										AT5G53660	-1.55616	0.0083695	2.0773		AT3G61920	-1.72069	0.00025844	3.58764
										AT1G52140	-1.55562	1.367e-21	20.8642		AT1G62480	-1.7206	1.8076e-33	32.7429
										AT3G60900	-1.55546	1.1702e-05	4.93174		AT1G13080	-1.7185	0.0015945	2.79738
										AT2G28315	-1.55519	0.00032318	3.49056		AT4G30460	-1.71837	4.5935e-21	20.3379
										AT2G21560	-1.55499	6.6729e-19	18.1757		AT4G15830	-1.71804	1.4526e-11	10.8379
										AT4G19840	-1.55496	3.9115e-40	39.4077		AT1G74090	-1.71788	6.4534e-25	24.1902
										AT1G80520	-1.5548	6.9953e-10	9.15519		AT5G25160	-1.71662	0.00047341	3.32476
										AT3G61210	-1.55462	3.4201e-31	30.466		AT3G49750	-1.71532	1.1994e-10	9.92104
										AT1G69580	-1.55172	2.9144e-15	14.5355		AT2G39700	-1.71465	1.8604e-13	12.7304
										AT2G32880	-1.5478	5.8426e-11	10.2334		AT2G28410	-1.71347	1.8868e-18	17.7243
										AT3G23670	-1.54748	2.3395e-09	8.63088		AT3G56970	-1.7118	0.00475	2.32331
										AT4G38062	-1.54594	0.00026663	3.57409		AT1G65180	-1.71106	0.0052939	2.27622
										AT1G07590	-1.54546	1.69e-25	24.7721		AT1G73600	-1.71098	1.5635e-08	7.8059
										AT5G07460	-1.54541	6.8227e-09	8.16604		AT1G52700	-1.71035	5.6603e-10	9.24716
										AT5G66300	-1.54528	1.7563e-06	5.7554		AT2G01818	-1.71018	3.4929e-06	5.45681
										AT1G33700	-1.54426	1.2156e-08	7.91521		AT5G04890	-1.70796	5.2535e-12	11.2796
										AT1G49470	-1.54352	1.2409e-21	20.9063		AT3G58350	-1.70587	3.3913e-05	4.46963
										AT3G51230	-1.54283	0.00026207	3.58158		AT4G16620	-1.70507	0.0015586	2.80727
										AT1G15150	-1.54252	0.0042933	2.36721		AT1G47670	-1.70221	6.3921e-20	19.1944
										AT5G21950	-1.54221	9.6785e-08	7.01419		AT2G19920	-1.70133	0.0024097	2.61804
										AT1G78090	-1.54144	3.9593e-05	4.40238		AT4G22900	-1.69683	0.0074985	2.12503
										AT1G54930	-1.54139	0.0078668	2.1042		AT1G64390	-1.69502	5.796e-05	4.23687
										AT1G50240	-1.5394	1.0951e-10	9.96055		AT2G37590	-1.69426	3.3895e-07	6.46986
										AT2G14620	-1.53925	0.00031568	3.50075		AT4G28950	-1.69278	4.6021e-05	4.33704
										AT4G37750	-1.5391	1.5356e-18	17.8137		AT1G04520	-1.69166	5.1459e-15	14.2885
										AT3G12090	-1.53887	3.6184e-10	9.44148		AT3G25730	-1.6897	1.5099e-09	8.82105
										AT1G27660	-1.53845	1.2382e-15	14.9072		AT4G39940	-1.6886	2.3417e-30	29.6305
										AT5G46700	-1.53757	3.7401e-17	16.4271		AT1G62800	-1.68808	1.7326e-14	13.7613
										AT3G01960	-1.53751	1.5486e-14	13.8101		AT1G20930	-1.68734	3.0511e-12	11.5155
										AT5G60470	-1.53621	3.6873e-06	5.43329		AT1G64370	-1.68662	7.5422e-33	32.1225
										AT5G38120	-1.53564	6.7292e-06	5.17204		AT3G54600	-1.68608	1.1614e-24	23.935
										AT1G07640	-1.53436	3.4257e-32	31.4653		AT1G78430	-1.6858	1.4373e-11	10.8425
										AT5G57390	-1.53416	7.5638e-09	8.12126		AT3G24460	-1.68538	3.842e-06	5.41544
										AT5G02260	-1.53278	2.7402e-09	8.56222		AT3G03830	-1.68515	0.0061805	2.20898
										AT3G10340	-1.53269	0.0012345	2.90851		AT4G24430	-1.68484	0.0053717	2.26989
										AT4G00940	-1.53258	9.7104e-08	7.01276		AT3G21600	-1.6847	2.3631e-05	4.62652
										AT4G04830	-1.53111	6.5476e-08	7.18392		AT1G07880	-1.6829	8.1468e-07	6.08901
										AT2G22610	-1.52929	2.3196e-06	5.63459		AT4G15960	-1.68167	3.2126e-06	5.49314
										AT4G20270	-1.52893	5.0961e-22	21.2928		AT2G36870	-1.6808	1.5437e-09	8.81144
										AT1G68350	-1.52869	0.0038155	2.41845		AT4G35620	-1.67891	8.6228e-08	7.06435
										AT1G46264	-1.52587	8.7934e-07	6.05584		AT5G64900	-1.67831	2.4664e-13	12.6079
										AT5G54060	-1.52585	4.6168e-07	6.33566		AT5G03995	-1.67774	7.2263e-05	4.14108
										AT1G07373	-1.52584	1.2632e-09	8.89853		AT3G17130	-1.67605	5.5238e-05	4.25776
										AT2G42610	-1.5255	8.5911e-09	8.06595		AT1G74458	-1.67592	8.8262e-06	5.05423
										AT1G30650	-1.52488	0.00022754	3.64294		AT3G04850	-1.67404	3.21e-08	7.49349
										AT1G16630	-1.52378	3.8388e-06	5.4158		AT4G28430	-1.67357	0.00022261	3.65246
										AT1G58340	-1.52363	4.6961e-06	5.32826		AT5G04950	-1.67237	7.8599e-09	8.10458
										AT5G37010	-1.5236	2.9393e-10	9.53176		AT5G46700	-1.66929	1.2329e-17	16.9091
										AT5G27000	-1.52143	0.00048836	3.31126		AT5G64080	-1.66785	9.8853e-19	18.005
										AT3G62570	-1.52108	0.00014969	3.82481		AT2G39250	-1.66744	9.9125e-09	8.00382
										AT1G08560	-1.51998	6.5363e-05	4.18467		AT1G71930	-1.66643	0.0053582	2.27098
										AT5G64240	-1.51958	4.2059e-22	21.3761		AT2G01990	-1.66578	4.18e-14	13.3788
										AT4G22790	-1.51919	9.2009e-09	8.03617		AT2G41130	-1.66554	1.434e-09	8.84345
										AT2G16740	-1.51774	5.2153e-08	7.28272		AT1G72810	-1.66492	1.8868e-19	18.7243
										AT5G18600	-1.51769	7.2585e-13	12.1392		AT5G64060	-1.66116	0.00041551	3.38142
										AT5G56530	-1.51704	1.1246e-20	19.949		AT4G37810	-1.66078	1.7807e-06	5.74941
										AT5G57785	-1.51547	5.6776e-07	6.24584		AT1G26820	-1.66058	3.4611e-08	7.46079
										AT4G33420	-1.51465	0.002979	2.52593		AT5G19875	-1.65952	4.6719e-07	6.33051
										AT1G18880	-1.51387	8.6668e-08	7.06214		AT3G61250	-1.65919	0.00071032	3.14855
										AT4G32830	-1.51381	1.0265e-08	7.98864		AT5G04680	-1.6588	4.8781e-07	6.31175
										AT3G01710	-1.51296	4.3771e-05	4.35881		AT4G18780	-1.65822	2.613e-08	7.58286
										AT5G02400	-1.51285	2.3749e-05	4.62435		AT4G39630	-1.6561	6.4863e-08	7.188
										AT5G23820	-1.51264	2.2285e-09	8.65199		AT2G42110	-1.65549	1.8105e-05	4.7422
										AT4G01985	-1.51222	3.0535e-09	8.5152		AT2G38620	-1.65458	1.4085e-05	4.85124
										AT4G15700	-1.5118	5.4993e-07	6.25969		AT2G20750	-1.65455	2.1386e-05	4.66987
										AT5G23370	-1.51141	0.00041516	3.38178		AT5G38300	-1.65449	3.2028e-07	6.49447
										AT2G29995	-1.50916	6.3973e-14	13.194		AT5G45670	-1.65398	1.5728e-21	20.8033
										AT3G04850	-1.50678	3.1084e-07	6.50746		AT5G11100	-1.65371	0.00054621	3.26264
										AT5G03495	-1.50672	1.5056e-08	7.82229		AT2G27930	-1.65246	0.005273	2.27794
										AT1G75700	-1.50628	0.0047803	2.32054		AT1G19850	-1.65152	5.7448e-09	8.24073
										AT5G42146	-1.50611	9.4434e-07	6.02487		AT5G03680	-1.65129	1.9504e-07	6.70988
										AT5G04000	-1.50602	0.00049274	3.30738		AT3G02640	-1.64701	7.9414e-18	17.1001
										AT5G62550	-1.50595	4.133e-16	15.3837		AT3G04140	-1.64692	0.0001676	3.77573
										AT1G70260	-1.50582	3.1836e-11	10.4971		AT4G31840	-1.64686	2.8798e-20	19.5406
										AT1G79430	-1.50489	5.0977e-21	20.2926		AT3G14570	-1.64611	0.00014884	3.82728
										AT3G27027	-1.50484	0.00022738	3.64325		AT4G39770	-1.64604	3.8656e-21	20.4128
										AT5G64687	-1.50464	0.0066192	2.17919		AT2G44300	-1.64597	5.0564e-12	11.2962
										AT1G67710	-1.50371	1.2407e-08	7.90633		AT4G04830	-1.64481	7.3691e-25	24.1326
										AT1G19510	-1.50366	0.0007482	3.12598		AT1G31710	-1.64361	6.5408e-25	24.1844
										AT1G10710	-1.50182	0.007142	2.14618		AT5G37950	-1.64348	3.4254e-06	5.46529
										AT4G08300	-1.5012	3.8166e-17	16.4183		AT3G51710	-1.64232	6.1419e-08	7.2117
										AT5G03995	-1.50037	4.5639e-08	7.34066		AT2G27970	-1.64189	1.0357e-22	21.9848
										AT2G26760	-1.49994	6.5719e-10	9.18231		AT1G24030	-1.64037	0.00052364	3.28097
										AT5G55520	-1.49852	3.6906e-07	6.4329		AT4G39795	-1.63952	7.7986e-09	8.10798
										AT4G30460	-1.49821	2.6225e-23	22.5813		AT1G02730	-1.639	3.5147e-12	11.4541
										AT2G39850	-1.49821	5.1438e-33	32.2887		AT3G57040	-1.63884	2.902e-18	17.5373
										AT1G54575	-1.49817	6.4703e-11	10.1891		AT3G63280	-1.63873	2.3799e-10	9.62344
										AT1G79420	-1.49707	5.0754e-07	6.29453		AT4G02850	-1.63792	2.1934e-13	12.6589
										AT1G01070	-1.49641	6.6825e-12	11.1751		AT4G18630	-1.63731	0.0001719	3.76472
										AT1G50110	-1.49598	2.8426e-07	6.54628		AT4G10380	-1.63729	2.9818e-20	19.5255
										AT3G50510	-1.4955	0.0085394	2.06857		AT4G36430	-1.6372	0.00016903	3.77204
										AT5G14330	-1.49521	3.2386e-05	4.48964		AT3G02120	-1.6369	1.9069e-08	7.71967
										AT3G61113	-1.49495	4.3976e-07	6.35678		AT1G49475	-1.63592	0.00030438	3.51658
										AT4G29230	-1.49464	0.0011548	2.93749		AT1G80370	-1.63592	3.2874e-08	7.48315
										AT3G46880	-1.49416	0.00012604	3.89949		AT5G59740	-1.63579	2.8307e-06	5.54811
										AT3G18960	-1.49309	9.6438e-06	5.01575		AT4G15700	-1.63488	1.1754e-07	6.92981
										AT5G40800	-1.49236	2.6283e-06	5.58033		AT5G13250	-1.63447	0.0085023	2.07046
										AT5G01910	-1.49132	6.8252e-05	4.16588		AT2G31900	-1.63363	0.001327	2.87713
										AT3G15800	-1.49005	0.00063352	3.19824		AT1G47840	-1.63262	1.2217e-07	6.91304
										AT4G35730	-1.48966	2.7523e-08	7.5603		AT5G64530	-1.63163	2.3416e-08	7.63049
										AT1G23150	-1.48952	9.8334e-05	4.0073		AT1G60060	-1.6312	1.1909e-05	4.92412
										AT1G03780	-1.48651	3.646e-07	6.43818		AT4G37890	-1.6305	0.00072751	3.13816
										AT1G23130	-1.48573	1.815e-39	38.7411		AT2G01520	-1.63009	0.00027663	3.5581
										AT5G16600	-1.48505	3.47e-05	4.45967		AT1G28470	-1.62928	0.0038402	2.41565
										AT1G34355	-1.48501	0.0013475	2.87047		AT1G65890	-1.62771	1.841e-13	12.7349
										AT3G15270	-1.48347	6.0242e-06	5.2201		AT3G53100	-1.62748	1.1928e-15	14.9234
										AT2G16050	-1.48306	3.7503e-13	12.4259		AT3G18260	-1.62697	9.1835e-06	5.03699
										AT5G17420	-1.48305	5.6744e-09	8.24608		AT4G29230	-1.62591	3.5844e-05	4.44558
										AT3G54180	-1.48178	1.2047e-08	7.91912		AT5G02420	-1.62518	0.00034957	3.45647
										AT3G25570	-1.48165	1.0242e-19	18.9896		AT5G19530	-1.625	2.0095e-22	21.6969
										AT4G21500	-1.48081	4.5227e-05	4.3446		AT1G67710	-1.62475	4.6217e-10	9.3352
										AT3G20150	-1.47899	2.0561e-09	8.68696		AT2G44830	-1.62392	9.8369e-15	14.0071
										AT4G37400	-1.4783	2.5003e-14	13.602		AT3G50410	-1.62324	2.2368e-06	5.65037
										AT4G00780	-1.47802	8.6806e-30	29.0615		AT2G29710	-1.62292	1.7945e-09	8.74606
										AT4G26660	-1.47606	6.6879e-08	7.17471		AT3G10000	-1.62005	0.0097273	2.01201
										AT3G22400	-1.47493	3.9181e-14	13.4069		AT3G17380	-1.61959	2.8842e-06	5.53997
										AT5G65230	-1.47269	0.0088678	2.05218		AT2G45870	-1.61907	0.00013232	3.87837
										AT5G14200	-1.47237	2.7733e-26	25.557		AT4G17920	-1.61862	0.0036958	2.43229
										AT2G01990	-1.46715	3.9803e-17	16.4001		AT5G60150	-1.61745	0.0073445	2.13404
										AT5G66440	-1.46607	0.00019301	3.71442		AT5G42710	-1.61713	0.0099543	2.00199
										AT2G35290	-1.46514	0.00015815	3.80093		AT5G63540	-1.61686	1.7713e-06	5.75171
										AT1G64370	-1.46464	2.9462e-38	37.5307		AT1G03020	-1.61637	6.0102e-06	5.22111
										AT1G23120	-1.46266	1.1034e-05	4.95727		AT2G33560	-1.61609	1.7693e-07	6.7522
										AT4G08290	-1.46185	1.566e-18	17.8052		AT5G11620	-1.61591	0.0011081	2.95542
										AT1G18370	-1.45968	2.3804e-09	8.62335		AT5G11410	-1.61386	0.00083072	3.08055
										AT2G02850	-1.45841	6.2788e-15	14.2021		AT5G48800	-1.61335	1.5415e-05	4.81206
										AT1G67870	-1.45835	3.8375e-38	37.416		AT3G02210	-1.61322	1.1958e-06	5.92234
										AT1G14250	-1.45777	2.4251e-32	31.6153		AT5G62550	-1.6132	3.9356e-16	15.405
										AT4G21820	-1.45761	0.00036003	3.44366		AT5G66230	-1.61251	5.4366e-14	13.2647
										AT5G65340	-1.45741	0.0020429	2.68975		AT2G25880	-1.61165	3.696e-08	7.43227
										AT3G15353	-1.45569	3.5581e-10	9.44878		AT5G13790	-1.61056	0.0082433	2.0839
										AT1G43650	-1.45542	9.7372e-09	8.01157		AT5G24660	-1.60887	5.7156e-21	20.2429
										AT4G23800	-1.4553	2.8077e-19	18.5516		AT2G15310	-1.60731	1.3306e-07	6.87595
										AT2G28580	-1.45499	0.0079031	2.1022		AT2G38160	-1.60715	1.4212e-05	4.84734
										AT5G56050	-1.45493	0.008196	2.0864		AT1G67856	-1.6043	0.00021559	3.66637
										AT1G70270	-1.45451	0.00034401	3.46343		AT2G34790	-1.60365	0.00015381	3.81302
										AT3G47400	-1.45444	0.0015783	2.80181		AT1G14730	-1.6019	1.7543e-09	8.7559
										AT1G18590	-1.45418	2.3919e-18	17.6213		AT1G73850	-1.60128	1.2367e-10	9.90774
										AT5G54660	-1.45065	8.2893e-21	20.0815		AT5G25370	-1.60121	0.00052867	3.27682
										AT4G05190	-1.45055	1.1093e-08	7.95495		AT1G23530	-1.60083	1.7747e-10	9.75088
										AT2G46650	-1.45048	1.3019e-13	12.8854		AT4G11990	-1.6008	2.9333e-05	4.53264
										AT5G25475	-1.4503	5.8429e-11	10.2334		AT4G05190	-1.60065	5.2001e-11	10.284
										AT1G52700	-1.45002	0.00030999	3.50865		AT5G62960	-1.60001	9.4109e-13	12.0264
										AT3G23890	-1.44955	3.2931e-09	8.4824		AT1G05260	-1.59676	0.001083	2.96537
										AT3G51930	-1.4493	1.852e-06	5.73236		AT1G34040	-1.5966	0.00069725	3.15661
										AT5G49320	-1.44916	0.0020472	2.68884		AT5G05510	-1.59607	3.3997e-05	4.46856
										AT3G63110	-1.44878	6.2438e-23	22.2046		AT4G30520	-1.59581	3.578e-05	4.44636
										AT1G49910	-1.44836	0.0084247	2.07445		AT4G30230	-1.59563	0.00052889	3.27663
										AT1G17480	-1.44782	2.1036e-07	6.67704		AT4G14330	-1.59483	5.3559e-09	8.27117
										AT3G63280	-1.44665	1.6314e-06	5.78744		AT1G27660	-1.59442	6.2503e-14	13.2041
										AT2G19090	-1.44491	1.1321e-07	6.94612		AT3G51895	-1.59412	1.2284e-08	7.91066
										AT4G16015	-1.44479	0.0012575	2.90049		AT1G64700	-1.59407	4.6544e-09	8.33214
										AT5G42720	-1.44435	9.7589e-21	20.0106		AT3G14940	-1.59384	5.5125e-09	8.25865
										AT1G16410	-1.44339	4.8342e-16	15.3157		AT4G37750	-1.59275	3.9531e-16	15.4031
										AT1G63295	-1.44273	0.0043941	2.35713		AT5G56530	-1.59222	1.5188e-12	11.8185
										AT1G31320	-1.44142	2.3778e-05	4.62382		AT3G25560	-1.5915	1.9178e-09	8.7172
										AT5G36910	-1.44077	9.2508e-12	11.0338		AT5G59240	-1.59098	0.00014653	3.83407
										AT4G25150	-1.44024	9.1015e-06	5.04089		AT5G54130	-1.59056	1.72e-08	7.76447
										AT2G14900	-1.43973	3.0839e-07	6.5109		AT4G37150	-1.58987	0.00052573	3.27924
										AT3G58720	-1.43843	3.106e-09	8.5078		AT4G19820	-1.58936	0.0031246	2.50521
										AT1G75590	-1.43815	0.00018106	3.74218		AT1G03620	-1.58885	0.00089969	3.04591
										AT1G30840	-1.43698	5.2755e-12	11.2777		AT1G64500	-1.58843	2.1256e-06	5.67252
										AT1G31935	-1.43611	5.7585e-05	4.23969		AT2G35350	-1.58821	6.3652e-06	5.19619
										AT1G80690	-1.43596	1.3754e-06	5.86157		AT3G48185	-1.58816	1.1962e-08	7.9222
										AT3G42670	-1.4357	0.0030632	2.51382		AT4G01600	-1.5871	4.8154e-07	6.31737
										AT3G26770	-1.43564	0.00033752	3.4717		AT1G35260	-1.58488	1.9054e-15	14.72
										AT1G76310	-1.43515	2.1459e-07	6.66839		AT4G32830	-1.58463	1.0823e-10	9.96565
										AT1G61930	-1.43416	0.0048818	2.31142		AT4G15210	-1.58331	8.9738e-10	9.04702
										AT4G28950	-1.43339	0.00043271	3.3638		AT1G75720	-1.58328	0.008025	2.09555
										AT3G27500	-1.43214	0.0095764	2.0188		AT2G32990	-1.58283	2.2013e-19	18.6573
										AT4G10380	-1.4311	9.8236e-08	7.00773		AT5G50820	-1.58272	0.00025632	3.59122
										AT1G02730	-1.43022	1.9627e-18	17.7071		AT2G35120	-1.58218	5.7277e-22	21.242
										AT2G35600	-1.42909	0.00056771	3.24587		AT2G20590	-1.58209	0.00012897	3.88951
										AT4G35620	-1.42906	4.6988e-05	4.32801		AT5G42330	-1.58177	2.6603e-06	5.57507
										AT1G54960	-1.42884	1.7008e-05	4.76935		AT5G57390	-1.58142	4.8308e-09	8.31598
										AT5G45520	-1.42851	3.5957e-05	4.44422		AT2G42820	-1.58075	2.574e-05	4.58939
										AT5G56580	-1.42662	0.00041311	3.38393		AT3G19620	-1.57893	7.3725e-09	8.13239
										AT2G41480	-1.42565	0.0049688	2.30375		AT5G57685	-1.57817	2.0826e-18	17.6814
										AT1G16310	-1.42447	3.3321e-09	8.47728		AT3G59765	-1.57778	1.2703e-05	4.89609
										AT1G33340	-1.42327	2.5407e-12	11.595		AT5G23010	-1.57753	1.9498e-28	27.71
										AT5G46871	-1.41994	0.00042807	3.36849		AT3G06035	-1.57697	2.7254e-22	21.5646
										AT3G50410	-1.4197	2.6367e-05	4.57894		AT5G54400	-1.57691	0.0031787	2.49775
										AT1G52750	-1.4191	2.5376e-07	6.59558		AT1G62540	-1.57632	1.7412e-13	12.7592
										AT3G03130	-1.41846	1.9396e-06	5.71229		AT1G51170	-1.5757	5.0862e-12	11.2936
										AT4G39630	-1.41725	0.00013213	3.879		AT1G47395	-1.57532	3.8128e-09	8.41876
										AT4G22160	-1.41656	1.5298e-12	11.8154		AT2G38090	-1.57399	3.1086e-11	10.5074
										AT1G09460	-1.41643	0.0021201	2.67364		AT2G29750	-1.57302	0.0059511	2.2254
										AT5G57685	-1.41611	1.0306e-21	20.9869		AT4G03100	-1.57257	1.0437e-10	9.98142
										AT1G51340	-1.41599	1.9897e-17	16.7012		AT2G44690	-1.57158	0.00011107	3.9544
										AT5G11970	-1.41354	0.0047623	2.32218		AT4G16015	-1.57007	0.001448	2.83923
										AT1G11600	-1.41331	1.3841e-10	9.85883		AT3G26050	-1.57004	0.00051126	3.29136
										AT1G07880	-1.41318	3.9479e-05	4.40363		AT1G05490	-1.56779	0.0044922	2.34754
										AT2G40900	-1.4115	1.8019e-15	14.7443		AT1G26760	-1.56778	0.0049563	2.30484
										AT2G46690	-1.41104	4.1478e-28	27.3822		AT5G40960	-1.56732	0.00044038	3.35617
										AT3G56220	-1.41039	0.00016907	3.77193		AT3G51280	-1.56626	2.6679e-09	8.57383
										AT5G11510	-1.40931	1.0382e-09	8.98372		AT4G23800	-1.5662	8.7311e-18	17.0589
										AT2G21140	-1.4044	3.5387e-15	14.4512		AT5G14940	-1.56599	1.3675e-09	8.86407
										AT5G64900	-1.40317	0.0045606	2.34098		AT1G05770	-1.5657	0.0022601	2.64587
										AT3G61380	-1.4028	2.0702e-12	11.684		AT1G76540	-1.56452	2.4721e-16	15.6069
										AT4G12030	-1.40144	3.9031e-12	11.4086		AT5G37790	-1.56397	9.7655e-14	13.0103
										AT2G28810	-1.40114	6.458e-23	22.1899		AT5G40030	-1.56358	0.00028917	3.53885
										AT3G23930	-1.40097	0.0011708	2.93152		AT3G09415	-1.56238	6.4323e-06	5.19163
										AT3G23730	-1.40095	1.8415e-13	12.7348		AT3G22400	-1.55937	4.2866e-08	7.36789
										AT4G31620	-1.40082	1.8246e-10	9.73883		AT2G25820	-1.55613	0.003612	2.44225
										AT2G41780	-1.39843	0.00027415	3.56201		AT5G54690	-1.55595	0.002243	2.64917
										AT1G44830	-1.39801	0.0065668	2.18265		AT4G25150	-1.5557	1.0763e-05	4.96807
										AT3G54390	-1.3978	9.3525e-12	11.0291		AT1G54385	-1.5545	8.9306e-08	7.04912
										AT5G50720	-1.39769	2.9788e-16	15.526		AT4G12580	-1.55357	0.0026413	2.57818
										AT1G53070	-1.39551	2.7805e-15	14.5559		AT1G43800	-1.55134	9.8186e-06	5.00795
										AT3G01990	-1.39505	1.1906e-05	4.92423		AT5G26790	-1.54864	0.00043234	3.36417
										AT5G65970	-1.39324	5.0956e-05	4.2928		AT5G16490	-1.54752	4.2382e-05	4.37282
										AT3G29370	-1.39103	9.7342e-06	5.0117		AT2G18196	-1.54748	1.2195e-07	6.91382
										AT2G15400	-1.38833	0.00017345	3.76083		AT4G22790	-1.54693	9.6743e-06	5.01438
										AT3G24660	-1.38818	1.5681e-09	8.80463		AT2G22680	-1.54536	1.2064e-08	7.91851
										AT3G59765	-1.38675	2.926e-06	5.53373		AT5G63850	-1.5436	1.2243e-22	21.9121
										AT2G23950	-1.38661	1.7957e-11	10.7458		AT2G37300	-1.5434	2.0836e-06	5.68119
										AT2G05632	-1.38552	1.7787e-07	6.7499		AT4G08160	-1.5428	0.0002532	3.59654
										AT1G63440	-1.38388	0.00036914	3.43281		AT4G27435	-1.54261	2.5021e-10	9.6017
										AT3G16500	-1.38323	1.134e-16	15.9454		AT3G10870	-1.5413	2.6957e-17	16.5693
										AT1G60989	-1.3829	0.0052115	2.28304		AT3G12750	-1.53908	1.2952e-08	7.88766
										AT5G22090	-1.38013	2.8702e-27	26.5421		AT1G02690	-1.53876	1.489e-11	10.8271
										AT4G36710	-1.37989	6.5193e-17	16.1858		AT4G23020	-1.53874	0.00049713	3.30353
										AT5G61480	-1.37979	2.4233e-22	21.6156		Novel00026	-1.53855	0.0047288	2.32525
										AT2G33350	-1.37946	0.0083635	2.07761		AT3G44730	-1.5376	2.226e-10	9.65247
										AT1G01900	-1.37936	0.0003354	3.47444		AT4G01985	-1.53747	0.0024828	2.60506
										AT1G68740	-1.37907	1.3027e-09	8.88516		AT5G59480	-1.53727	3.3072e-09	8.48054
										AT5G26790	-1.37861	0.0076436	2.1167		AT1G05370	-1.53671	0.0072648	2.13878
										AT2G42840	-1.37578	2.1633e-08	7.66488		AT3G56980	-1.53652	0.0010955	2.96039
										AT2G20515	-1.37571	0.00040319	3.39449		AT3G52720	-1.53541	5.6958e-08	7.24445
										AT3G22540	-1.37557	0.0037947	2.42082		AT1G72140	-1.53527	0.0016238	2.78947
										AT3G02500	-1.37516	0.0051147	2.29118		AT5G49320	-1.53445	0.0016088	2.7935
										AT1G21440	-1.37481	5.4393e-09	8.26446		AT3G23430	-1.53442	1.8101e-14	13.7423
										AT5G25370	-1.37357	0.0050078	2.30035		AT1G74030	-1.53337	8.3297e-08	7.07937
										AT3G21230	-1.37332	1.5328e-08	7.81451		AT5G64700	-1.53188	0.00018776	3.7264
										Novel00045	-1.37316	0.0010356	2.98481		AT4G25240	-1.53037	4.544e-07	6.34256
										AT3G52525	-1.37294	0.0015597	2.80696		AT2G21260	-1.52899	0.0078066	2.10754
										AT1G54385	-1.37019	2.4023e-07	6.61937		AT4G13770	-1.52801	1.0824e-26	25.9656
										AT4G13540	-1.36948	3.6071e-05	4.44284		AT3G26760	-1.52731	7.6824e-07	6.1145
										AT3G17360	-1.36923	1.3833e-06	5.85908		AT3G24770	-1.52556	6.1578e-21	20.2106
										AT5G15830	-1.36725	1.9797e-06	5.7034		AT1G65500	-1.52547	7.9221e-09	8.10116
										AT2G03505	-1.36652	7.5011e-05	4.12488		AT4G36240	-1.52517	7.1247e-11	10.1472
										AT5G57123	-1.36598	0.00020315	3.69218		AT3G12320	-1.52517	0.0019446	2.71117
										AT3G26330	-1.3656	0.0066173	2.17932		AT1G74290	-1.52462	1.0147e-05	4.99366
										AT3G16450	-1.36513	0.00048983	3.30995		AT5G57130	-1.52437	0.00020956	3.67869
										AT1G43910	-1.36458	0.0035684	2.44753		AT1G66860	-1.52357	0.0013736	2.86214
										AT5G07690	-1.36131	1.9053e-28	27.72		AT4G00480	-1.52333	1.0513e-08	7.97827
										AT5G20710	-1.36069	0.001374	2.86201		AT5G10930	-1.52262	0.0085137	2.06988
										AT1G73040	-1.35965	2.1168e-05	4.67432		AT2G39330	-1.52043	2.1967e-05	4.65823
										AT4G03210	-1.35917	7.7062e-25	24.1132		AT3G45210	-1.51982	4.7412e-07	6.32411
										AT2G43100	-1.35812	6.7993e-09	8.16754		AT3G20830	-1.51979	5.8655e-05	4.23169
										AT1G16330	-1.35793	0.0019527	2.70936		AT1G49910	-1.51976	1.7291e-05	4.76218
										AT4G32800	-1.3566	8.1415e-15	14.0893		AT5G02460	-1.51926	2.2344e-07	6.65084
										AT3G14780	-1.35467	0.0084404	2.07364		AT5G52830	-1.51922	1.7703e-05	4.75195
										AT3G10000	-1.3546	0.0056284	2.24962		AT5G60142	-1.51827	6.9719e-06	5.15665
										AT5G23940	-1.35459	3.4326e-07	6.46438		AT2G42200	-1.51761	4.1713e-08	7.37973
										AT3G54710	-1.35399	0.00043443	3.36208		AT1G16520	-1.51642	2.0894e-13	12.68
										AT2G46970	-1.35395	0.00051906	3.28478		AT4G01680	-1.51636	6.776e-10	9.16903
										AT5G65040	-1.35391	0.0054005	2.26757		AT4G13600	-1.51547	0.0029246	2.53393
										AT4G23496	-1.35266	0.0010314	2.98657		AT5G13880	-1.51536	0.00027354	3.56298
										AT2G47180	-1.35265	6.1209e-15	14.2132		AT5G20970	-1.51495	1.2613e-07	6.89918
										AT3G52490	-1.35106	1.3676e-07	6.86404		AT3G57157	-1.51406	0.00047359	3.3246
										AT1G26540	-1.35094	5.3291e-06	5.27335		AT4G34160	-1.51361	2.2733e-16	15.6433
										AT5G37660	-1.35055	1.7603e-08	7.75441		AT5G20870	-1.5134	0.00021055	3.67664
										AT2G30890	-1.35017	3.5793e-05	4.4462		AT1G52140	-1.51313	1.5002e-15	14.8239
										AT2G38090	-1.34995	5.0006e-09	8.30098		AT5G45700	-1.51288	8.0236e-08	7.09563
										AT3G63300	-1.34831	3.8663e-07	6.4127		AT4G16008	-1.51239	6.9785e-10	9.15624
										AT5G18300	-1.34795	0.008292	2.08134		AT5G62710	-1.51123	1.0985e-12	11.9592
										AT1G78110	-1.34681	6.211e-19	18.2068		AT5G67200	-1.51	5.9134e-07	6.22816
										AT3G28840	-1.34374	6.2356e-06	5.20512		AT2G16850	-1.50927	7.0885e-14	13.1494
										AT5G50150	-1.34295	6.4729e-20	19.1889		AT4G22200	-1.50911	7.516e-05	4.12401
										Novel00103	-1.34256	0.00051107	3.29152		AT4G00780	-1.50744	3.4408e-25	24.4633
										AT5G23810	-1.34193	1.6458e-08	7.78362		AT5G57785	-1.50638	5.1307e-08	7.28982
										AT5G08000	-1.34111	6.9432e-08	7.15844		AT2G40480	-1.50621	3.9825e-10	9.39984
										AT5G05160	-1.34068	1.1822e-12	11.9273		AT5G20540	-1.50608	2.161e-09	8.66535
										AT3G53100	-1.33945	4.1626e-15	14.3806		AT2G46630	-1.504	1.5983e-18	17.7963
										AT3G05980	-1.33868	4.8436e-08	7.31483		AT5G15530	-1.50342	1.325e-11	10.8778
										AT2G19800	-1.33653	0.0051999	2.28401		AT3G51060	-1.50337	0.0011144	2.95296
										AT5G35732	-1.33618	6.1632e-08	7.21019		AT5G09220	-1.50102	2.8248e-15	14.549
										AT1G64620	-1.33595	3.1461e-06	5.50223		AT3G25290	-1.50092	4.2971e-11	10.3668
										AT1G65150	-1.33528	5.0575e-10	9.29606		AT5G01660	-1.50048	0.00064067	3.19337
										AT4G18630	-1.33444	1.406e-05	4.85201		AT5G44390	-1.49986	0.00017546	3.75582
										AT3G54560	-1.33419	5.151e-11	10.2881		AT1G25510	-1.49984	3.7117e-06	5.43043
										AT2G40330	-1.33413	0.0011531	2.93813		AT5G65140	-1.49937	2.0925e-10	9.67933
										AT2G47500	-1.33334	1.2258e-15	14.9116		AT1G18330	-1.49847	0.0055457	2.25604
										AT2G35350	-1.33316	5.1086e-08	7.2917		AT3G61220	-1.49786	3.4884e-05	4.45737
										AT1G19850	-1.33282	9.526e-14	13.0211		AT2G45480	-1.49531	0.0046525	2.33231
										AT3G52630	-1.33044	3.4644e-13	12.4604		AT2G14750	-1.49309	1.7295e-19	18.7621
										AT4G39190	-1.3295	4.962e-12	11.3043		AT1G01390	-1.49239	2.5864e-06	5.5873
										AT5G03680	-1.32845	0.00098088	3.00838		AT1G69580	-1.49197	7.1095e-11	10.1482
										AT3G23635	-1.32551	8.6125e-05	4.06487		AT2G45490	-1.49067	0.0014595	2.8358
										AT5G60142	-1.32494	4.3459e-06	5.36192		AT1G32450	-1.49059	3.1925e-05	4.49587
										AT3G61920	-1.324	0.0012389	2.90696		AT5G17160	-1.49016	1.3378e-10	9.87361
										AT2G25880	-1.32329	2.6024e-05	4.58463		AT5G22460	-1.48791	6.4966e-12	11.1873
										AT4G30180	-1.3227	5.8289e-06	5.23441		AT5G56120	-1.48787	8.3386e-08	7.07891
										AT5G13880	-1.32253	8.6486e-05	4.06305		AT4G09950	-1.48782	4.2094e-08	7.37578
										AT4G28500	-1.32217	0.00031574	3.50067		AT1G67860	-1.48755	1.8595e-18	17.7306
										AT1G03820	-1.32186	1.2089e-12	11.9176		AT5G16250	-1.48629	6.841e-18	17.1649
										AT4G33440	-1.32048	5.7549e-08	7.23996		AT2G46970	-1.48482	0.0086669	2.06214
										AT3G44960	-1.31994	0.0030715	2.51265		AT2G37640	-1.48384	1.1848e-06	5.92635
										AT5G57350	-1.3195	2.1698e-28	27.6636		AT1G60030	-1.48359	0.002011	2.69659
										AT3G60660	-1.31884	4.5557e-06	5.34144		AT1G75390	-1.48341	1.4477e-06	5.83932
										AT1G74890	-1.31813	0.00024038	3.6191		AT5G53590	-1.48255	2.7037e-10	9.56804
										AT2G25210	-1.3177	5.1947e-08	7.28444		AT1G50110	-1.48171	2.2384e-06	5.65006
										AT5G03670	-1.31662	3.6597e-05	4.43655		AT3G59200	-1.48154	0.0072556	2.13933
										AT5G03610	-1.31652	3.7415e-14	13.427		AT2G03500	-1.47517	1.4832e-07	6.8288
										AT2G37300	-1.31584	8.4792e-05	4.07165		AT1G63440	-1.47493	0.00039826	3.39983
										AT2G21800	-1.31573	0.0072336	2.14065		AT2G39560	-1.47483	0.0010917	2.9619
										AT1G66480	-1.31572	7.6983e-08	7.11361		AT2G19910	-1.4748	3.5292e-05	4.45232
										AT2G42110	-1.31522	0.00075238	3.12356		AT3G16340	-1.47448	2.0301e-09	8.69248
										AT1G78000	-1.31405	8.6517e-08	7.0629		AT5G44560	-1.47439	0.00022375	3.65024
										AT1G69410	-1.31398	9.2363e-28	27.0345		AT3G15650	-1.47236	0.0014732	2.83174
										AT5G50335	-1.31315	8.5398e-06	5.06855		AT5G23940	-1.47216	7.274e-16	15.1382
										AT2G35120	-1.31255	1.2374e-09	8.90749		AT1G29380	-1.47077	6.0272e-05	4.21988
										AT3G13520	-1.31239	5.1426e-05	4.28882		AT1G62045	-1.47072	0.00010147	3.99366
										AT1G69970	-1.31204	6.1404e-07	6.2118		AT5G61480	-1.47066	5.7555e-14	13.2399
										AT5G42330	-1.31203	4.3845e-05	4.35808		AT3G25710	-1.47057	5.6007e-08	7.25176
										AT4G03100	-1.3104	2.1582e-08	7.66591		AT3G23890	-1.47042	0.00067273	3.17216
										AT4G34810	-1.30801	0.0059822	2.22314		AT5G22930	-1.46964	0.00016859	3.77317
										AT5G03150	-1.30754	7.8731e-13	12.1039		AT3G09070	-1.46903	4.2062e-06	5.37611
										AT5G66110	-1.30683	0.00016252	3.78909		AT5G23910	-1.46475	1.7551e-09	8.7557
										AT5G33370	-1.30374	0.0054194	2.26605		AT3G47500	-1.46342	0.00010576	3.97568
										AT1G80370	-1.30358	2.1751e-05	4.66252		AT2G32280	-1.46328	1.8856e-09	8.72455
										AT3G49110	-1.30107	7.6078e-07	6.11874		AT1G28400	-1.46142	2.4979e-21	20.6024
										AT1G63650	-1.30071	0.00010554	3.97658		AT4G01730	-1.45987	4.1354e-09	8.38348
										AT5G23910	-1.30063	8.443e-08	7.0735		AT3G09260	-1.45929	4.2359e-21	20.3731
										AT5G40730	-1.30054	0.00054958	3.25997		AT1G69080	-1.45857	1.8994e-09	8.72138
										AT4G15690	-1.29994	7.6906e-06	5.11404		AT1G75250	-1.4574	1.5313e-12	11.8149
										AT3G11280	-1.29924	8.1261e-25	24.0901		AT1G30840	-1.45724	3.5081e-07	6.45493
										AT3G43270	-1.29917	3.1756e-14	13.4982		AT2G47500	-1.45665	2.8978e-08	7.53793
										AT5G22580	-1.29872	7.4367e-11	10.1286		AT5G49660	-1.45601	6.2909e-16	15.2013
										AT5G23170	-1.29862	4.7173e-06	5.32631		AT5G42800	-1.45525	0.0029058	2.53673
										AT1G76740	-1.29861	0.00085648	3.06728		AT5G60250	-1.45394	4.3155e-05	4.36497
										AT1G03840	-1.29828	0.0072315	2.14077		AT1G52150	-1.45151	1.764e-07	6.7535
										AT5G53730	-1.29819	3.7452e-15	14.4265		AT3G24660	-1.45028	2.3096e-10	9.63646
										AT1G63100	-1.29789	6.5393e-06	5.18447		AT5G54670	-1.44976	3.0397e-07	6.51717
										AT2G30540	-1.29737	1.4017e-05	4.85334		AT1G06830	-1.44933	1.9703e-08	7.70547
										AT2G25790	-1.29609	3.4801e-08	7.45841		Novel00106	-1.44933	0.00074824	3.12596
										AT5G02600	-1.29603	7.0066e-16	15.1545		AT5G01820	-1.44862	6.2554e-06	5.20374
										AT3G10870	-1.29498	1.7225e-10	9.76384		AT3G12870	-1.44704	1.4613e-07	6.83526
										AT2G21650	-1.29399	5.7505e-13	12.2403		AT4G05110	-1.4467	0.0003271	3.48532
										AT4G24015	-1.2901	0.0012737	2.89493		AT1G58370	-1.44533	0.0012022	2.92002
										AT3G05600	-1.29005	0.0003515	3.45407		AT3G03840	-1.44428	0.0029017	2.53735
										Novel00130	-1.28788	6.9898e-10	9.15554		AT3G56730	-1.44427	0.0018656	2.72918
										AT1G65890	-1.28774	1.6429e-06	5.78439		AT4G01390	-1.44408	3.3065e-07	6.48063
										AT1G65310	-1.28713	6.1608e-05	4.21036		AT5G22860	-1.44366	9.1663e-13	12.0378
										AT2G31730	-1.28646	9.9903e-06	5.00042		AT2G45750	-1.44213	1.5908e-05	4.79838
										AT5G43250	-1.28587	1.48e-09	8.82974		AT2G41250	-1.44159	5.1875e-05	4.28504
										AT3G25730	-1.28482	1.0784e-05	4.96722		AT5G13290	-1.44048	6.7682e-06	5.16953
										AT5G49660	-1.2828	5.2193e-23	22.2824		AT5G67390	-1.43851	0.00030722	3.51255
										AT2G36307	-1.28219	0.00023844	3.62262		AT1G13650	-1.43809	9.0017e-06	5.04568
										AT5G63087	-1.28001	0.00013526	3.86883		AT1G65310	-1.4372	8.9319e-13	12.0491
										AT1G68800	-1.27983	0.0032686	2.48564		AT1G02820	-1.43681	4.9397e-08	7.3063
										AT1G53160	-1.27806	2.3665e-07	6.62589		AT2G33400	-1.43647	1.4114e-09	8.85035
										AT1G53690	-1.27539	0.00048838	3.31124		AT4G18340	-1.4356	3.2614e-12	11.4866
										AT2G37460	-1.2745	1.7345e-17	16.7608		AT2G19110	-1.43525	3.9967e-05	4.3983
										AT4G30520	-1.27397	3.4296e-11	10.4648		AT4G08290	-1.43466	4.4889e-15	14.3479
										AT1G23730	-1.27382	1.8486e-05	4.73316		AT4G18050	-1.43457	0.0006947	3.1582
										AT3G57160	-1.27252	0.00064664	3.18934		AT5G06150	-1.4345	3.1684e-11	10.4992
										AT3G62950	-1.27241	1.0318e-11	10.9864		AT4G33810	-1.43393	0.0010083	2.99641
										AT3G46490	-1.27159	7.3636e-06	5.13291		AT4G14465	-1.43363	2.1693e-06	5.66368
										AT3G10190	-1.26948	1.0469e-05	4.98009		AT3G01330	-1.43362	3.2223e-05	4.49183
										AT5G02420	-1.26937	0.0020455	2.6892		AT5G23170	-1.43186	2.1912e-05	4.65932
										AT1G65860	-1.269	2.411e-11	10.6178		AT2G44940	-1.42667	0.00073584	3.13322
										AT5G14890	-1.2689	0.0030051	2.52214		AT4G24710	-1.42649	4.1221e-05	4.38488
										AT5G43380	-1.26817	0.00063021	3.20051		AT2G45900	-1.42537	0.0028859	2.53972
										AT5G25890	-1.26696	1.1279e-17	16.9477		AT3G51230	-1.42503	0.0003393	3.46942
										AT5G59720	-1.26658	2.1435e-07	6.66888		AT2G20550	-1.42459	4.0486e-08	7.3927
										AT1G72670	-1.26652	2.3726e-05	4.62478		AT4G00050	-1.42306	2.0515e-11	10.6879
										AT5G17160	-1.26559	2.5042e-09	8.60133		AT1G35310	-1.42283	2.8591e-09	8.54377
										AT1G77520	-1.26486	0.00072029	3.14249		AT2G29410	-1.42277	0.0032641	2.48624
										AT5G24800	-1.26438	2.2159e-06	5.65445		AT3G26330	-1.42243	0.0049123	2.30872
										AT2G34710	-1.26411	2.1147e-18	17.6748		AT1G12260	-1.42155	0.001795	2.74594
										AT5G50820	-1.26381	3.7315e-05	4.42812		AT2G29995	-1.42124	2.0433e-10	9.68967
										AT3G27650	-1.26234	9.7469e-07	6.01113		AT2G34490	-1.42079	1.239e-15	14.9069
										AT1G52565	-1.26217	0.0048112	2.31775		AT1G21810	-1.41586	0.00062796	3.20207
										AT1G49620	-1.2618	1.6525e-05	4.78186		AT5G67160	-1.41561	2.3641e-06	5.62633
										AT5G20420	-1.26108	0.00074013	3.13069		AT5G37010	-1.41558	2.4621e-08	7.60869
										AT5G67210	-1.26089	1.1831e-05	4.92698		AT3G20150	-1.41514	0.00016819	3.7742
										AT5G48800	-1.26088	6.5009e-07	6.18703		AT5G05160	-1.41444	3.4729e-12	11.4593
										AT4G14090	-1.26052	1.3146e-05	4.88121		AT2G22190	-1.41424	2.3615e-07	6.62681
										AT1G21510	-1.25694	0.0095226	2.02124		AT5G46871	-1.41388	0.0020316	2.69216
										AT2G20635	-1.25581	0.00027757	3.55663		AT5G22580	-1.41313	2.7561e-11	10.5597
										AT2G20550	-1.25522	1.501e-08	7.82362		AT3G06840	-1.41229	0.00068574	3.16384
										AT4G38530	-1.25517	0.00046687	3.3308		AT1G65150	-1.41183	9.542e-09	8.02036
										AT3G19050	-1.25501	0.00087929	3.05587		AT5G10080	-1.41132	5.2271e-05	4.28174
										AT4G37890	-1.25498	5.0542e-05	4.29635		AT4G09890	-1.41069	5.5412e-18	17.2564
										AT5G12300	-1.25457	1.8228e-05	4.73926		AT3G44050	-1.41018	0.0019828	2.70272
										AT3G14560	-1.25202	1.8628e-08	7.72983		AT1G55210	-1.40975	4.1564e-15	14.3813
										AT1G24030	-1.24735	0.0080128	2.09622		AT3G56240	-1.40955	2.791e-20	19.5542
										AT1G26770	-1.24719	2.6233e-10	9.58115		AT5G53730	-1.40849	1.9048e-08	7.72015
										AT1G45201	-1.24674	1.6324e-26	25.7872		AT2G02130	-1.40682	5.0162e-22	21.2996
										AT4G39770	-1.24671	5.2846e-16	15.277		AT2G26760	-1.40615	2.836e-09	8.54729
										AT2G07170	-1.24616	6.6381e-06	5.17796		AT3G55110	-1.4049	3.7298e-05	4.42831
										AT1G01640	-1.24264	7.5493e-07	6.12209		AT4G21680	-1.40374	0.0069509	2.15796
										AT5G64310	-1.24237	5.0549e-05	4.29629		AT3G07420	-1.40319	4.544e-09	8.34256
										AT5G44560	-1.2417	0.0030343	2.51794		AT5G20710	-1.4029	0.0072653	2.13875
										AT4G30980	-1.24091	3.6362e-05	4.43935		AT5G01910	-1.4022	1.7844e-05	4.74851
										AT5G22860	-1.24088	3.8918e-12	11.4098		AT1G68800	-1.40121	0.005775	2.23845
										AT4G39940	-1.23922	1.6789e-15	14.775		AT2G40130	-1.39978	0.0040317	2.39451
										AT1G56430	-1.23821	4.9954e-08	7.30143		AT3G61890	-1.39903	3.9489e-09	8.40352
										AT1G31760	-1.23566	3.9425e-06	5.40423		AT3G62160	-1.39877	3.7706e-05	4.42359
										AT2G32510	-1.23539	0.00010113	3.99512		AT5G20070	-1.39824	7.5814e-19	18.1203
										AT2G18260	-1.23435	0.00015398	3.81254		AT4G34550	-1.39809	0.0043919	2.35735
										AT5G14940	-1.23377	5.9655e-11	10.2244		AT3G28840	-1.39722	0.00016474	3.7832
										AT5G53290	-1.23376	0.00021347	3.67066		AT3G63300	-1.39705	6.9386e-07	6.15873
										AT4G15210	-1.23346	2.5054e-05	4.60112		AT4G38740	-1.39697	6.993e-17	16.1553
										AT5G15230	-1.23335	0.00010161	3.99306		AT4G24700	-1.39661	0.0014137	2.84964
										AT1G34040	-1.23249	0.0018172	2.7406		AT3G12145	-1.39611	1.6835e-09	8.77379
										AT1G49230	-1.23234	1.2016e-12	11.9202		AT3G10310	-1.39315	0.00088915	3.05102
										AT3G29770	-1.231	3.9976e-07	6.3982		AT1G47410	-1.39315	1.0433e-06	5.98159
										AT5G35670	-1.23014	1.489e-05	4.82711		AT2G46830	-1.39248	9.8211e-07	6.00784
										AT1G34580	-1.22919	9.616e-06	5.01701		AT5G55620	-1.39199	0.0017832	2.7488
										AT1G62560	-1.22879	8.2602e-17	16.083		AT5G17450	-1.39144	2.0028e-10	9.69836
										AT2G37390	-1.22841	0.00023799	3.62344		AT5G57123	-1.39017	9.1114e-05	4.04041
										AT4G01430	-1.22647	0.0070129	2.1541		AT2G20635	-1.38959	0.00024427	3.61213
										AT4G00480	-1.22433	5.9428e-07	6.22601		AT2G35150	-1.38874	7.5863e-06	5.11997
										AT2G23620	-1.22257	0.0095869	2.01832		AT5G18600	-1.38812	3.4623e-20	19.4606
										AT1G14900	-1.22245	2.1317e-13	12.6713		AT4G17000	-1.38746	1.9446e-06	5.71117
										AT2G34190	-1.2218	0.00017916	3.74676		AT3G58980	-1.38699	3.856e-10	9.41386
										AT1G25422	-1.22111	2.1084e-06	5.67605		AT3G61820	-1.38698	1.4725e-06	5.83194
										AT5G60250	-1.21999	0.0027475	2.56106		AT1G09960	-1.38685	1.7103e-06	5.76693
										AT5G62820	-1.21969	0.00027659	3.55816		AT3G47510	-1.38663	2.2818e-08	7.64172
										AT5G59240	-1.21685	0.0018357	2.7362		AT5G11990	-1.38553	0.0036525	2.43741
										AT5G67160	-1.2159	1.521e-08	7.81787		AT3G21230	-1.38431	4.1138e-08	7.38576
										AT3G44050	-1.21576	0.00028474	3.54555		AT5G64550	-1.3831	2.1825e-05	4.66105
										AT3G13510	-1.21569	1.118e-15	14.9516		AT5G50150	-1.38251	1.2048e-15	14.9191
										AT5G17650	-1.21533	2.2036e-07	6.65687		AT4G21760	-1.38182	0.00062912	3.20127
										AT1G76410	-1.21509	7.718e-05	4.1125		AT2G30080	-1.38158	5.6937e-08	7.24461
										AT2G37090	-1.21484	0.00026547	3.57598		AT5G05365	-1.38092	2.4809e-06	5.60539
										AT1G79620	-1.21127	2.6533e-10	9.57621		AT1G44110	-1.38016	1.6803e-07	6.77461
										AT1G22710	-1.20676	4.9189e-25	24.3081		AT1G66140	-1.37969	5.8297e-12	11.2344
										AT1G70220	-1.20643	0.0060798	2.21611		AT2G20515	-1.37694	0.00101	2.99568
										AT5G02440	-1.20566	0.0013659	2.86458		AT4G15660	-1.37666	8.2741e-11	10.0823
										AT3G14570	-1.20564	9.3474e-09	8.02931		AT5G53830	-1.37663	1.7707e-11	10.7519
										AT1G10780	-1.20257	7.0135e-06	5.15407		AT1G23205	-1.37648	5.7333e-07	6.2416
										AT1G47395	-1.20224	4.4424e-10	9.35238		AT3G30720	-1.37642	3.9794e-07	6.40018
										AT1G06490	-1.20214	2.821e-06	5.5496		AT2G32960	-1.37566	0.0001163	3.93442
										AT2G33560	-1.20097	0.0016795	2.77482		AT1G65900	-1.37503	1.1985e-11	10.9214
										AT5G21105	-1.20083	4.5927e-21	20.3379		AT3G57010	-1.37372	0.00080088	3.09643
										AT5G45670	-1.20049	2.6779e-15	14.5722		AT5G59080	-1.37235	7.4324e-19	18.1289
										AT1G71830	-1.19929	1.3459e-07	6.87099		AT3G23635	-1.37192	0.00083557	3.07802
										AT1G04425	-1.19876	0.0080567	2.09384		AT2G28620	-1.37162	2.4582e-07	6.60938
										AT3G16870	-1.1985	1.0517e-10	9.97811		AT4G19840	-1.37076	9.4481e-21	20.0247
										AT5G60020	-1.19825	0.0075646	2.12121		AT1G51340	-1.37018	4.4407e-11	10.3525
										AT5G49800	-1.19793	5.0719e-07	6.29483		AT3G44716	-1.36943	1.2673e-06	5.89712
										AT4G34800	-1.19702	0.0087396	2.05851		AT1G31750	-1.36903	5.1068e-05	4.29185
										AT5G17210	-1.19648	4.7027e-06	5.32765		AT2G01008	-1.3689	3.8435e-06	5.41527
										AT2G38530	-1.19433	2.4889e-20	19.604		AT5G26220	-1.36592	0.0070478	2.15195
										AT3G16340	-1.19398	2.2441e-05	4.64896		AT3G01940	-1.36507	0.00030658	3.51346
										AT1G23000	-1.1938	3.3208e-05	4.47876		AT1G62981	-1.36422	0.00028738	3.54154
										AT3G12860	-1.19336	0.0002795	3.55362		AT5G48850	-1.36309	0.002226	2.65247
										AT5G23660	-1.19209	2.7679e-08	7.55785		AT1G23800	-1.36306	3.6465e-13	12.4381
										AT3G14940	-1.19091	1.2997e-09	8.88616		AT4G13690	-1.36221	0.0021013	2.67751
										AT1G02460	-1.19063	1.5545e-09	8.80841		AT2G22620	-1.36204	0.0062458	2.20441
										AT2G22680	-1.19052	2.7092e-05	4.56716		AT1G66620	-1.36023	1.9105e-07	6.71885
										AT1G23800	-1.18985	2.7313e-07	6.56363		AT5G01890	-1.35996	2.6775e-09	8.57227
										AT4G34420	-1.18866	0.00046137	3.33595		AT3G48540	-1.35927	0.00010261	3.98881
										AT4G24275	-1.18712	9.6986e-05	4.01329		AT2G19990	-1.35848	0.0023521	2.62854
										AT5G42980	-1.18675	6.3013e-25	24.2006		AT2G22510	-1.35679	0.0021912	2.65932
										AT4G14380	-1.18667	0.00014167	3.84872		AT5G55730	-1.35483	9.7519e-15	14.0109
										AT5G24390	-1.18559	0.0061085	2.21407		AT2G43800	-1.35483	3.7084e-16	15.4308
										AT1G53140	-1.18512	0.00021177	3.67414		AT4G14150	-1.35463	3.3067e-05	4.48061
										AT5G61420	-1.18383	6.6441e-23	22.1776		AT2G22200	-1.35311	0.0063139	2.1997
										AT5G65420	-1.18327	0.00012307	3.90985		AT2G36307	-1.35228	0.00099839	3.0007
										AT5G18065	-1.1826	3.9998e-05	4.39796		AT5G15510	-1.34821	3.6921e-06	5.43273
										AT1G75060	-1.18239	0.0004936	3.30662		AT1G31040	-1.34798	0.0017448	2.75825
										AT2G25820	-1.18227	0.003287	2.4832		AT1G09890	-1.3478	0.0032763	2.48462
										AT2G43550	-1.18224	0.00013458	3.87102		AT2G30370	-1.34655	0.0020572	2.68672
										AT2G46590	-1.18207	5.2628e-07	6.27878		AT4G17880	-1.34647	0.00033946	3.46921
										AT4G13345	-1.18191	3.8671e-12	11.4126		AT1G11420	-1.34496	3.7232e-07	6.42908
										AT5G48500	-1.17874	2.1851e-07	6.66053		AT2G08610	-1.34479	0.00015259	3.81647
										AT5G67200	-1.17839	1.088e-06	5.96337		AT1G24020	-1.34224	1.4255e-11	10.846
										AT3G55420	-1.17824	3.8563e-16	15.4138		AT5G66350	-1.34222	3.0181e-06	5.52027
										AT5G12140	-1.17804	3.2971e-24	23.4819		AT2G30820	-1.34152	9.6252e-05	4.01659
										AT4G28250	-1.17672	1.2618e-07	6.89901		AT4G25420	-1.34127	0.00076763	3.11485
										AT2G33793	-1.17476	0.0011219	2.95005		AT1G17560	-1.34064	2.0363e-07	6.69116
										AT5G54510	-1.17464	6.7146e-05	4.17298		AT1G47370	-1.33979	0.0072224	2.14132
										AT4G25240	-1.17207	0.00062462	3.20438		AT3G46490	-1.33866	1.9756e-09	8.7043
										AT5G67270	-1.1712	2.1518e-06	5.6672		AT1G01580	-1.33851	0.00011269	3.94811
										AT1G67750	-1.17104	7.1135e-07	6.14792		AT5G39220	-1.33827	0.0019247	2.71564
										AT5G53830	-1.17086	0.00025342	3.59616		AT3G20370	-1.33759	0.00085202	3.06955
										AT1G69600	-1.1703	0.0019942	2.70023		AT1G69970	-1.33718	9.8619e-06	5.00604
										AT4G13690	-1.1657	0.0047219	2.32588		AT1G76610	-1.337	7.0528e-06	5.15164
										AT1G11120	-1.16537	0.0057844	2.23774		AT1G07590	-1.3356	1.9853e-16	15.7022
										AT1G11545	-1.16501	4.039e-06	5.39373		AT1G63530	-1.33548	7.1204e-05	4.1475
										AT4G05130	-1.1649	0.00072797	3.13789		AT4G38062	-1.33414	0.0014072	2.85164
										AT5G52220	-1.16485	0.0040897	2.38831		AT3G10600	-1.33054	0.0081409	2.08933
										AT1G31710	-1.16078	1.9281e-06	5.71487		AT4G23500	-1.3304	1.7511e-07	6.75669
										AT5G19260	-1.16034	9.2807e-06	5.03242		AT5G22740	-1.32997	1.9783e-17	16.7037
										AT2G35150	-1.15967	0.00016724	3.77666		AT4G11320	-1.3263	3.8708e-09	8.4122
										AT1G80280	-1.15929	2.5308e-09	8.59674		AT5G23350	-1.32624	8.667e-08	7.06213
										AT5G63710	-1.15739	1.7553e-16	15.7556		AT5G04080	-1.32372	4.8641e-05	4.313
										AT2G29125	-1.15622	0.00099206	3.00346		AT2G29170	-1.32297	4.0627e-09	8.39119
										AT3G41762	-1.15568	9.5811e-05	4.01858		AT3G05330	-1.32285	1.1208e-07	6.95047
										AT3G53010	-1.15557	0.0019733	2.70481		AT2G15440	-1.32196	8.2297e-06	5.08462
										AT1G02640	-1.1549	3.251e-10	9.48798		AT1G75780	-1.3218	7.5988e-07	6.11925
										AT1G52150	-1.15378	6.9981e-17	16.155		AT2G07170	-1.32131	2.8109e-06	5.55115
										AT1G19640	-1.15212	0.0001504	3.82275		AT1G80050	-1.32095	1.843e-15	14.7345
										AT4G16447	-1.15185	3.2132e-07	6.49306		AT3G15550	-1.31967	1.8819e-06	5.7254
										AT2G02820	-1.15074	3.5096e-10	9.45474		AT3G03850	-1.31723	0.00067983	3.1676
										AT4G36120	-1.15053	5.7659e-07	6.23913		AT1G61660	-1.31722	1.7194e-08	7.76462
										AT1G01370	-1.14992	4.2094e-06	5.37578		AT1G80690	-1.317	7.4933e-10	9.12533
										AT5G64700	-1.14978	0.0027387	2.56246		AT1G23460	-1.31663	2.0648e-07	6.68512
										AT5G16190	-1.14914	1.1246e-06	5.949		AT1G76310	-1.31593	2.7341e-07	6.56319
										AT5G23010	-1.14905	8.4911e-09	8.07104		AT1G46264	-1.31531	2.3346e-05	4.63179
										AT4G32870	-1.14894	1.2473e-09	8.90403		AT1G64780	-1.31529	5.0471e-07	6.29696
										AT1G28400	-1.14839	1.0482e-12	11.9796		AT3G53380	-1.31479	5.724e-08	7.2423
										AT3G61250	-1.14729	0.0017265	2.76283		AT3G44940	-1.31479	3.9767e-07	6.40048
										AT1G12880	-1.14694	1.1897e-05	4.92456		AT4G14090	-1.31426	3.006e-06	5.52201
										AT4G34790	-1.14674	8.3416e-10	9.07875		AT2G32870	-1.31248	1.3127e-18	17.8818
										AT1G02690	-1.14673	4.5563e-08	7.34139		AT1G22230	-1.31174	8.1964e-05	4.08638
										AT5G03870	-1.14669	0.00051797	3.2857		AT3G53530	-1.31141	0.004766	2.32185
										AT1G47370	-1.14609	0.001659	2.78015		AT3G25590	-1.31136	9.5323e-05	4.0208
										AT5G62710	-1.14534	3.3274e-10	9.47789		AT5G67280	-1.31121	0.0020948	2.67886
										AT3G48540	-1.14465	0.00022328	3.65115		AT3G25570	-1.31121	2.9973e-10	9.52327
										AT1G49475	-1.1444	0.0015953	2.79716		AT5G03760	-1.311	2.897e-07	6.53805
										AT3G25710	-1.14209	1.6315e-08	7.78741		AT5G55520	-1.3109	0.00062444	3.20451
										AT3G21240	-1.14206	3.1497e-10	9.50173		AT3G15353	-1.31088	2.5511e-08	7.59327
										AT1G50490	-1.14062	1.7142e-09	8.76594		AT3G12090	-1.31087	1.0744e-07	6.96883
										AT4G21270	-1.1406	1.5393e-05	4.81268		AT4G37730	-1.30994	0.00010208	3.99106
										AT1G35780	-1.14041	1.4624e-08	7.83493		AT2G47780	-1.3097	6.2951e-05	4.201
										AT5G52830	-1.13955	0.0001516	3.8193		AT4G14770	-1.30946	3.1935e-09	8.49573
										AT3G60720	-1.13916	0.00012285	3.91062		AT4G37650	-1.30904	2.6497e-11	10.5768
										AT2G32990	-1.13892	1.2186e-05	4.91414		AT4G00820	-1.30761	1.357e-08	7.86742
										AT1G16520	-1.13756	5.454e-09	8.26328		AT3G17120	-1.30712	1.2549e-07	6.90139
										AT4G34760	-1.1374	5.123e-07	6.29048		AT5G65420	-1.30681	0.00013673	3.86414
										AT2G40480	-1.13707	7.8417e-12	11.1056		AT1G33700	-1.30552	3.5012e-05	4.45578
										AT1G72250	-1.13502	3.7525e-05	4.42568		AT5G11550	-1.30517	7.4181e-10	9.12971
										AT5G07700	-1.13355	2.0035e-09	8.69821		AT5G24580	-1.30505	1.3356e-06	5.87432
										AT5G65390	-1.13241	2.0792e-05	4.6821		AT5G48310	-1.30493	0.0002044	3.68952
										AT5G15530	-1.13205	1.0021e-08	7.99909		AT5G25590	-1.30454	2.2857e-07	6.64098
										AT1G23850	-1.13149	0.0018071	2.74302		AT4G14020	-1.30339	9.7066e-13	12.0129
										AT5G06470	-1.13103	0.00056487	3.24805		AT3G10200	-1.30268	0.00041484	3.38212
										AT1G07902	-1.12984	0.0090591	2.04291		AT2G18328	-1.30261	5.7473e-15	14.2405
										AT3G02210	-1.12975	0.00056251	3.24987		AT3G01710	-1.30254	4.7562e-05	4.32274
										AT1G77120	-1.12916	3.5617e-10	9.44834		AT1G11600	-1.3023	4.1132e-08	7.38582
										AT2G38810	-1.12856	4.3913e-08	7.35741		AT1G72250	-1.30228	0.0068823	2.16227
										AT4G28310	-1.12853	3.7618e-09	8.4246		AT3G45960	-1.30178	1.266e-05	4.89757
										AT2G21200	-1.12728	0.00068374	3.16511		AT1G73870	-1.30076	0.00064088	3.19322
										AT2G21060	-1.12582	2.2639e-16	15.6451		AT5G23820	-1.30012	3.7355e-07	6.42765
										AT1G73010	-1.12549	0.010266	1.9886		AT3G16175	-1.29893	0.00038806	3.4111
										AT1G62800	-1.12459	2.9879e-12	11.5246		AT2G23620	-1.29642	0.0089374	2.04879
										AT3G52720	-1.12364	8.3245e-10	9.07964		AT5G57500	-1.29602	5.325e-05	4.27368
										AT4G00900	-1.12106	1.316e-09	8.88074		AT5G27000	-1.29557	0.0026519	2.57644
										AT3G57010	-1.12068	2.1156e-05	4.67457		AT5G42210	-1.29505	0.0034211	2.46583
										AT3G58650	-1.11826	9.684e-06	5.01395		AT1G75060	-1.29426	4.7263e-05	4.32548
										AT3G04630	-1.11819	2.3587e-13	12.6273		AT3G02230	-1.29405	5.0945e-17	16.2929
										AT4G13710	-1.11805	5.6749e-05	4.24604		AT5G67270	-1.28998	1.9894e-07	6.70128
										AT4G24060	-1.11613	1.9763e-12	11.7041		AT3G48770	-1.28974	0.0079968	2.09708
										AT5G17980	-1.11447	5.6734e-06	5.24616		AT5G24150	-1.28954	6.7537e-08	7.17046
										AT4G38740	-1.11308	6.2447e-22	21.2045		AT1G12380	-1.28938	1.8401e-10	9.73516
										AT5G67350	-1.11131	3.3162e-10	9.47936		AT3G13275	-1.28904	4.0699e-12	11.3904
										AT5G67600	-1.1111	1.1739e-05	4.93037		AT1G75280	-1.28832	2.1652e-14	13.6645
										AT1G67820	-1.11076	0.00049913	3.30179		AT5G66440	-1.288	0.00026374	3.57882
										AT2G47160	-1.11076	2.9281e-11	10.5334		AT5G09730	-1.28746	6.5294e-05	4.18513
										AT1G11160	-1.11009	0.0028743	2.54147		AT2G05632	-1.28583	0.0007941	3.10012
										AT3G05190	-1.10989	0.0010492	2.97914		AT4G09500	-1.28488	0.0030051	2.52214
										AT5G24330	-1.10839	0.0018693	2.72832		AT2G24260	-1.28471	1.9902e-08	7.7011
										AT1G31812	-1.10804	2.1823e-07	6.66109		AT1G19540	-1.28431	2.0662e-06	5.68483
										AT5G11780	-1.10713	0.0035608	2.44845		AT1G34580	-1.284	7.3786e-06	5.13203
										AT1G29980	-1.10707	8.6789e-06	5.06154		AT1G62180	-1.28396	0.0047431	2.32394
										AT1G69700	-1.10702	3.133e-13	12.504		AT3G28130	-1.28372	1.2017e-14	13.9202
										AT3G61840	-1.1064	0.0081752	2.0875		AT2G16430	-1.2836	1.8636e-15	14.7296
										AT2G29890	-1.10558	5.7946e-06	5.23698		AT5G63710	-1.28353	7.1287e-06	5.14699
										AT4G37660	-1.10486	3.9263e-08	7.40602		AT1G66830	-1.28313	0.0031008	2.50853
										AT3G56020	-1.10472	0.00013025	3.88522		AT5G60930	-1.28261	0.00070727	3.15041
										AT1G60680	-1.10402	0.001949	2.71019		AT4G14380	-1.28231	0.00098086	3.00839
										AT3G51910	-1.10231	0.0010995	2.9588		AT2G28810	-1.28217	1.4021e-12	11.8532
										AT5G56460	-1.10091	1.2822e-06	5.89204		AT3G02550	-1.28174	1.2674e-06	5.89709
										AT2G23300	-1.09919	0.00035749	3.44674		AT2G19580	-1.28157	0.0048322	2.31586
										AT3G62690	-1.0983	5.4353e-11	10.2648		AT1G70830	-1.28125	1.1907e-18	17.9242
										AT5G15950	-1.09822	6.6102e-15	14.1798		AT3G52630	-1.28025	2.1245e-08	7.67274
										AT1G80710	-1.09745	0.00022344	3.65084		AT5G56460	-1.28023	9.6976e-07	6.01334
										AT5G18860	-1.09712	8.7262e-11	10.0592		AT1G78110	-1.27938	2.657e-13	12.5756
										AT5G19340	-1.09686	0.0032687	2.48562		AT1G21510	-1.27751	0.0056974	2.24432
										AT5G60930	-1.09655	1.4477e-06	5.83932		AT5G49525	-1.27507	7.8958e-06	5.1026
										AT2G32960	-1.09495	0.00017482	3.75741		AT1G02900	-1.27467	5.1216e-06	5.29059
										AT4G07950	-1.09391	8.0199e-06	5.09583		AT2G02820	-1.27426	9.8374e-06	5.00712
										AT5G57190	-1.09383	7.983e-05	4.09783		AT1G05870	-1.27238	0.00023662	3.62595
										AT3G11930	-1.09344	1.4002e-19	18.8538		AT4G01140	-1.27156	0.0059766	2.22355
										AT1G57820	-1.09222	1.7768e-12	11.7504		AT1G16390	-1.27135	1.5224e-12	11.8175
										AT1G72810	-1.09204	2.6506e-13	12.5767		AT1G03780	-1.27128	7.8244e-06	5.10655
										AT2G28510	-1.09172	3.2428e-14	13.4891		AT5G49630	-1.27099	5.4428e-17	16.2642
										AT5G65660	-1.09159	3.9092e-05	4.40791		AT5G66740	-1.27064	0.0082461	2.08375
										AT1G47410	-1.09078	3.9961e-06	5.39836		AT3G21670	-1.27064	1.0899e-05	4.96261
										AT5G44160	-1.09071	0.00042249	3.37418		AT4G13345	-1.27045	1.6801e-10	9.77466
										AT1G20610	-1.09018	7.5477e-05	4.12219		AT1G73620	-1.27044	2.1171e-06	5.67426
										AT5G67090	-1.0897	0.0064938	2.1875		AT1G10380	-1.27026	1.7868e-07	6.74792
										AT2G01210	-1.08865	0.0080506	2.09417		AT5G04150	-1.27015	7.2918e-05	4.13717
										AT1G14210	-1.08809	1.2765e-13	12.894		AT2G19090	-1.26858	0.0006325	3.19894
										AT1G12320	-1.0877	9.156e-05	4.03829		AT3G05600	-1.26783	0.00017776	3.75017
										Novel00142	-1.08622	1.5386e-15	14.8129		AT2G32720	-1.26782	1.7705e-14	13.7519
										AT3G48740	-1.08622	1.4033e-15	14.8528		AT2G17300	-1.26651	2.1895e-06	5.65966
										AT2G29730	-1.08492	1.4147e-10	9.84934		AT5G27690	-1.26634	5.1171e-10	9.29098
										AT1G14430	-1.08406	1.2621e-05	4.89891		AT5G03350	-1.26615	7.9798e-10	9.09801
										AT5G10080	-1.08331	0.0018152	2.74108		AT2G42840	-1.26558	1.1481e-13	12.94
										AT1G01110	-1.08303	4.2605e-06	5.37054		AT5G34940	-1.26351	6.831e-06	5.16552
										AT5G22740	-1.08267	8.0293e-16	15.0953		AT1G66540	-1.2632	0.00010609	3.97433
										AT4G31985	-1.08158	0.00022771	3.64262		AT1G20480	-1.26287	0.0068593	2.16372
										AT4G14150	-1.08109	0.0029626	2.52833		AT4G33130	-1.26185	0.0036336	2.43966
										AT1G68795	-1.08021	0.0002049	3.68846		AT4G12410	-1.26101	0.0030025	2.52252
										AT3G54400	-1.08021	6.1988e-11	10.2077		AT3G44450	-1.26083	0.00035779	3.44637
										AT1G06640	-1.08007	8.0091e-06	5.09642		AT2G22920	-1.26062	4.8697e-05	4.3125
										AT2G34930	-1.07996	0.00021349	3.67062		AT5G28030	-1.25916	0.00036167	3.44169
										AT5G38110	-1.07982	1.9614e-09	8.70743		AT5G44670	-1.25892	6.4315e-09	8.19169
										AT3G06890	-1.07788	0.00016788	3.775		AT1G52342	-1.25738	3.3692e-05	4.47247
										AT1G61610	-1.07786	3.7958e-05	4.4207		AT4G29020	-1.25703	2.0601e-17	16.6861
										AT5G64530	-1.0777	5.5607e-06	5.25487		AT3G01960	-1.25697	1.0457e-05	4.98059
										AT4G29700	-1.0771	1.4092e-10	9.85103		AT3G62740	-1.2569	2.1586e-05	4.66583
										AT1G15570	-1.07689	2.1744e-07	6.66266		AT2G37260	-1.25665	5.4707e-05	4.26196
										AT4G33160	-1.07623	0.00038561	3.41385		AT5G25830	-1.25637	0.00047322	3.32494
										AT5G42680	-1.07483	1.0152e-05	4.99345		AT1G03820	-1.2563	1.4807e-08	7.82953
										AT3G61850	-1.07366	1.1006e-07	6.95837		AT1G34355	-1.25579	0.00040411	3.3935
										AT1G63300	-1.07167	7.2748e-07	6.13818		AT5G25890	-1.25498	1.9513e-12	11.7097
										AT4G33790	-1.07096	0.009346	2.02937		AT5G21100	-1.25289	3.4506e-06	5.46211
										AT5G48310	-1.07094	0.0016543	2.78139		AT5G19340	-1.25197	8.3754e-06	5.07699
										AT1G15960	-1.07089	0.0018386	2.73551		AT5G03150	-1.25159	3.5136e-07	6.45425
										AT1G10980	-1.07032	0.00041816	3.37866		AT2G34720	-1.2506	2.2759e-09	8.64285
										AT5G34940	-1.07026	3.2022e-05	4.49455		AT3G23090	-1.24989	3.8477e-12	11.4148
										AT2G28660	-1.06993	3.3298e-07	6.47758		AT3G08660	-1.24903	8.3806e-08	7.07672
										AT4G11320	-1.06993	0.007591	2.1197		AT5G42860	-1.24823	6.2686e-10	9.20283
										AT1G09450	-1.06908	0.0023651	2.62615		AT5G11510	-1.24768	2.2366e-05	4.65041
										AT2G22920	-1.06803	0.00036325	3.43979		AT5G06000	-1.24743	0.0018017	2.74432
										AT5G49300	-1.06788	8.8371e-06	5.05369		AT3G14190	-1.24705	6.276e-06	5.20232
										AT1G66830	-1.06568	0.00010416	3.9823		AT2G01150	-1.24632	1.1379e-08	7.9439
										AT5G58300	-1.06552	5.8581e-08	7.23224		AT3G21190	-1.24596	5.4689e-14	13.2621
										AT2G30820	-1.06433	0.0016391	2.78539		AT1G67870	-1.24519	5.2202e-18	17.2823
										AT4G29020	-1.06342	7.279e-19	18.1379		AT1G10657	-1.24414	0.00011823	3.92727
										AT1G70830	-1.06181	5.4098e-20	19.2668		AT4G34560	-1.24403	3.1533e-09	8.50123
										AT3G07410	-1.06145	0.00050007	3.30097		AT4G20270	-1.2424	3.3766e-12	11.4715
										AT1G04800	-1.06056	0.00016127	3.79245		AT2G18120	-1.24089	0.0048936	2.31037
										AT1G77700	-1.05951	0.00030595	3.51435		AT3G17360	-1.23729	0.0058583	2.23223
										AT2G16060	-1.05926	2.5775e-07	6.5888		AT1G26540	-1.23716	1.9727e-05	4.70494
										AT1G72210	-1.05926	0.00038236	3.41753		AT5G15630	-1.23607	8.2089e-05	4.08572
										AT2G30080	-1.05799	3.0495e-05	4.51577		AT2G23000	-1.23584	2.7569e-11	10.5596
										AT1G06360	-1.05798	2.5954e-16	15.5858		AT2G12462	-1.23567	6.4541e-06	5.19016
										AT1G62870	-1.05787	1.0649e-05	4.97269		AT5G62210	-1.23537	2.2511e-05	4.64761
										AT3G05810	-1.05667	2.3352e-10	9.63168		AT3G58720	-1.23435	5.8976e-07	6.22932
										AT4G34750	-1.05603	1.7509e-06	5.75674		AT4G23490	-1.23423	3.8355e-07	6.41618
										AT4G34770	-1.05579	1.6673e-05	4.77799		AT1G29980	-1.23317	6.1775e-12	11.2092
										AT2G44830	-1.05559	2.9462e-08	7.53074		AT4G34420	-1.23311	0.0059708	2.22397
										AT2G19110	-1.05532	5.4537e-08	7.26331		AT2G23300	-1.23235	6.6342e-05	4.17821
										AT3G20860	-1.05463	0.00023598	3.62712		AT4G22130	-1.23017	1.3803e-13	12.86
										AT4G26960	-1.05443	3.7212e-06	5.42932		AT1G11730	-1.22916	0.001722	2.76397
										AT5G20740	-1.05252	4.9248e-10	9.30761		AT5G26670	-1.22904	2.7126e-09	8.56661
										AT1G74090	-1.05246	1.033e-09	8.9859		AT1G79430	-1.22666	2.5261e-10	9.59755
										AT3G25900	-1.05163	0.000297	3.52724		AT1G09180	-1.22625	0.00016497	3.7826
										AT1G68330	-1.05127	0.00063767	3.1954		AT5G03960	-1.22622	0.0068599	2.16368
										AT5G65170	-1.05118	0.00020769	3.68258		AT5G63530	-1.22593	4.028e-15	14.3949
										AT3G13275	-1.05047	2.6866e-05	4.5708		AT1G14900	-1.22401	7.6921e-11	10.114
										AT1G16640	-1.0499	0.006193	2.2081		AT1G68740	-1.2238	0.00022054	3.65651
										AT5G49280	-1.04936	0.00023622	3.62668		AT4G00880	-1.2215	0.00094894	3.02276
										AT1G75750	-1.04802	4.0944e-19	18.3878		AT5G50335	-1.22133	6.0928e-05	4.21518
										AT1G78430	-1.0472	5.4875e-06	5.26063		AT1G76740	-1.22077	0.002678	2.57219
										AT5G04470	-1.04526	0.0017289	2.76223		AT3G16500	-1.22061	7.9219e-14	13.1012
										AT3G07540	-1.04512	1.6908e-10	9.77191		AT4G24780	-1.21988	0.0026169	2.58221
										AT1G01600	-1.04501	0.0020134	2.69607		AT2G47750	-1.21969	2.863e-06	5.54318
										AT1G68238	-1.04488	9.9195e-08	7.00351		AT5G35732	-1.21866	7.735e-06	5.11154
										AT5G44030	-1.04467	9.7008e-09	8.01319		AT1G51355	-1.21863	0.0053514	2.27153
										AT1G73620	-1.04461	0.00066746	3.17557		AT5G17050	-1.21843	6.56e-09	8.1831
										AT1G31750	-1.04365	0.00087679	3.0571		AT1G79420	-1.21832	0.00023067	3.63701
										AT1G71110	-1.04339	2.2074e-05	4.65612		AT5G46730	-1.21722	9.0502e-10	9.04334
										AT1G69080	-1.04338	0.00077043	3.11327		AT5G48500	-1.21602	4.1722e-11	10.3796
										AT1G12160	-1.04325	0.00064803	3.1884		AT5G67090	-1.2159	0.0015875	2.79929
										AT5G23360	-1.03946	0.0094057	2.02661		AT4G26660	-1.21517	3.3081e-06	5.48042
										AT3G19790	-1.03931	7.1058e-09	8.14839		AT1G16630	-1.21377	0.00019439	3.71133
										AT2G18780	-1.03875	0.0015542	2.80849		AT1G77380	-1.21295	0.0031203	2.5058
										AT2G32590	-1.03737	0.00025328	3.5964		AT1G28390	-1.2123	2.2074e-07	6.65612
										AT2G22470	-1.03727	2.1047e-05	4.67681		AT1G31335	-1.21204	8.8782e-09	8.05168
										AT5G60890	-1.03675	9.4554e-14	13.0243		AT2G41780	-1.21178	0.00010017	3.99926
										AT2G32720	-1.03674	8.2064e-09	8.08585		AT5G45960	-1.21159	0.0020739	2.68321
										AT1G35830	-1.03647	0.00067826	3.1686		AT1G77280	-1.21106	0.0016488	2.78283
										AT5G50370	-1.03579	2.7204e-06	5.56537		AT5G44160	-1.21024	0.00032568	3.48721
										AT5G22940	-1.03432	4.0528e-05	4.39224		AT1G14430	-1.20944	4.9617e-06	5.30437
										AT5G09805	-1.03324	0.0031243	2.50525		AT1G33800	-1.20934	0.00015857	3.79978
										AT2G24970	-1.03307	0.0019261	2.71532		AT2G27990	-1.20903	0.00048449	3.31472
										AT2G43620	-1.03195	0.00048908	3.31062		AT2G41370	-1.2089	2.42e-05	4.61618
										AT1G03940	-1.03188	7.7539e-06	5.11048		AT4G21270	-1.20857	2.1792e-06	5.6617
										AT4G18050	-1.03055	0.0047868	2.31995		AT3G03450	-1.2082	0.0019264	2.71525
										AT3G13980	-1.03046	5.8703e-14	13.2313		AT2G46740	-1.20581	0.0014928	2.826
										AT5G15430	-1.02999	0.0085624	2.0674		AT2G39310	-1.2051	2.134e-11	10.6708
										AT4G30850	-1.02831	0.00014691	3.83295		AT2G40820	-1.20508	1.0636e-10	9.97322
										AT3G15550	-1.02568	0.00066934	3.17435		AT3G06030	-1.20504	1.3679e-08	7.86395
										AT1G17560	-1.02497	0.00090536	3.04318		AT4G33560	-1.20457	0.00095147	3.0216
										AT2G47230	-1.02387	6.4169e-05	4.19267		AT5G04230	-1.20357	6.2606e-13	12.2034
										AT3G12710	-1.02378	2.1253e-09	8.67258		AT3G54710	-1.20333	0.0015258	2.8165
										AT5G51850	-1.02228	0.00010369	3.98426		AT4G24010	-1.2013	3.0123e-05	4.5211
										AT4G37650	-1.02184	5.2385e-11	10.2808		AT1G58520	-1.20075	0.00016489	3.78281
										AT3G08990	-1.02178	2.1735e-05	4.66284		AT3G17840	-1.19994	2.7061e-11	10.5677
										AT5G56490	-1.02128	0.0075143	2.12411		AT3G61850	-1.19981	7.1581e-09	8.1452
										AT1G35260	-1.02038	3.3288e-09	8.47771		AT4G23770	-1.1998	1.7996e-05	4.74482
										AT1G77870	-1.0194	0.0017805	2.74946		AT3G50280	-1.19977	3.7071e-06	5.43097
										AT1G80830	-1.01808	9.8855e-05	4.005		AT1G68795	-1.19944	0.0021677	2.664
										AT4G30110	-1.01785	2.6821e-10	9.57153		AT5G03610	-1.19908	4.4066e-11	10.3559
										AT3G08520	-1.01773	2.4746e-07	6.60649		AT3G27660	-1.19855	0.0023135	2.63573
										AT1G14440	-1.0174	1.9946e-08	7.70014		AT3G52370	-1.19815	4.6896e-08	7.32886
										AT3G06030	-1.01638	8.9449e-07	6.04842		AT2G16890	-1.19731	1.0019e-06	5.99918
										AT1G11420	-1.01573	7.8109e-05	4.1073		AT5G50890	-1.19474	5.3399e-07	6.27247
										AT3G03450	-1.01523	3.1316e-07	6.50423		AT1G32780	-1.19445	0.00020488	3.6885
										AT5G51600	-1.01424	8.9535e-05	4.04801		AT1G72670	-1.1915	0.00017714	3.75168
										AT1G21740	-1.0136	0.00029914	3.52413		AT1G08560	-1.19114	6.4313e-08	7.1917
										AT5G55120	-1.01136	3.1777e-13	12.4979		AT1G20060	-1.19051	0.0005896	3.22944
										AT1G60660	-1.01077	4.8815e-09	8.31145		AT3G55370	-1.19036	1.3397e-08	7.87299
										AT3G10860	-1.01049	1.2496e-05	4.90323		AT5G63090	-1.19016	8.2099e-08	7.08566
										AT3G07420	-1.01048	8.5811e-06	5.06646		AT5G51600	-1.18793	6.3703e-06	5.19584
										AT1G75780	-1.01048	1.4233e-07	6.8467		AT2G46690	-1.18764	2.8825e-11	10.5402
										AT1G10640	-1.01047	5.3125e-07	6.2747		AT2G36350	-1.18761	8.4939e-05	4.07089
										AT1G23935	-1.00985	0.00081295	3.08994		AT3G55120	-1.1873	0.00013259	3.87749
										AT1G24020	-1.00971	3.6326e-10	9.43978		AT5G12080	-1.18719	3.3366e-10	9.4767
										AT1G55200	-1.00787	0.0031121	2.50695		AT5G51850	-1.18675	0.0024835	2.60494
										AT3G54780	-1.00773	1.2503e-05	4.90299		AT1G23120	-1.1861	0.00070025	3.15475
										AT3G59540	-1.00747	1.2528e-07	6.90212		AT5G39660	-1.186	0.00032671	3.48584
										AT5G04230	-1.00651	5.1e-13	12.2924		AT5G45650	-1.18293	3.9896e-07	6.39907
										AT5G01075	-1.00497	5.7663e-06	5.2391		AT3G16430	-1.1828	0.0038692	2.41238
										AT4G32690	-1.00439	9.51e-07	6.02182		AT5G65170	-1.18271	0.00014654	3.83404
										AT2G41200	-1.00388	0.00081088	3.09104		AT5G06470	-1.18029	0.00047668	3.32177
										AT5G63090	-1.00374	7.3527e-06	5.13355		AT3G27650	-1.18023	5.6481e-07	6.2481
										AT3G20390	-1.00141	9.2206e-07	6.03524		AT3G26290	-1.18005	0.0019204	2.71661
										AT1G75945	6.22417	9.9604e-32	31.0017		AT4G10420	-1.17894	0.0049293	2.30721
										Novel00114	5.86352	4.1945e-07	6.37732		AT4G26960	-1.17851	0.00018778	3.72635
										AT4G38000	4.08541	0.0061879	2.20846		Novel00130	-1.17798	1.8054e-07	6.74343
										AT3G06955	3.63197	4.5853e-16	15.3386		AT2G35700	-1.17726	0.00059325	3.22676
										AT3G21500	3.4428	0.00040346	3.3942		AT5G03190	-1.1758	7.3405e-12	11.1343
										AT1G19250	2.94656	0.0090982	2.04104		AT5G23360	-1.17559	1.1392e-08	7.9434
										AT3G02840	2.79651	0.0090125	2.04515		AT1G47400	-1.17417	1.945e-12	11.7111
										AT5G44430	2.70563	2.468e-07	6.60765		AT5G11590	-1.17404	0.001288	2.89008
										AT4G37990	2.47495	0.0084983	2.07067		AT5G37020	-1.17295	1.1958e-11	10.9223
										AT2G29470	2.31894	0.00076218	3.11794		AT4G13990	-1.17242	2.1187e-06	5.67393
										AT5G15800	2.27951	0.00011681	3.93252		AT1G71050	-1.17187	2.0833e-08	7.68125
										AT5G10720	2.20691	0.0075742	2.12066		AT5G65870	-1.17063	6.1882e-10	9.20844
										AT2G26010	2.15133	8.3151e-08	7.08013		AT5G63650	-1.16896	1.7165e-05	4.76536
										ATMG00510	2.06392	0.010129	1.99443		AT1G07640	-1.16734	3.4877e-12	11.4575
										AT5G07200	2.05059	0.002415	2.61708		AT1G50490	-1.16623	3.9039e-09	8.4085
										AT2G38240	1.8754	0.0001287	3.89042		AT3G05190	-1.166	0.00070861	3.14959
										AT2G26020	1.85295	1.4372e-08	7.84248		AT2G32765	-1.16595	0.0009009	3.04532
										AT2G13810	1.8291	0.0063408	2.19786		AT5G65640	-1.16534	6.8958e-08	7.16142
										AT5G21940	1.82587	3.7904e-12	11.4213		AT3G45010	-1.16516	1.1984e-12	11.9214
										AT2G14610	1.78859	0.0002388	3.62197		AT1G14350	-1.16332	5.3657e-05	4.27037
										AT1G73260	1.77582	0.0031822	2.49727		AT1G47960	-1.16195	3.5387e-12	11.4512
										AT2G40000	1.75925	3.4104e-05	4.46719		AT2G02850	-1.16143	5.1514e-07	6.28807
										AT3G28510	1.73887	3.9738e-12	11.4008		AT5G66750	-1.16121	1.3242e-05	4.87805
										AT5G44420	1.71581	1.6329e-06	5.78704		AT4G14200	-1.16097	6.0922e-05	4.21523
										AT5G67080	1.68095	7.9963e-09	8.09711		AT5G18860	-1.15898	2.0855e-09	8.68079
										AT5G61600	1.60583	0.0072463	2.13988		AT5G03230	-1.15626	0.0020552	2.68715
										AT4G21840	1.54216	3.0632e-05	4.51382		AT1G01900	-1.15534	0.0012909	2.88911
										AT3G05945	1.53384	4.2422e-07	6.37241		AT4G22860	-1.15507	0.0030792	2.51156
										AT3G46090	1.52251	0.00049255	3.30755		AT1G79270	-1.15497	2.3151e-08	7.63543
										AT5G40230	1.5149	4.2831e-05	4.36824		AT5G67600	-1.15466	8.7342e-14	13.0588
										AT5G56550	1.49346	0.00027373	3.56268		AT1G56670	-1.15412	4.8709e-06	5.31239
										AT1G11785	1.49308	3.8712e-05	4.41215		AT5G23730	-1.15279	7.9432e-06	5.1
										AT3G48360	1.44051	0.00098509	3.00652		AT4G34760	-1.1527	0.0011072	2.95577
										AT5G61160	1.43498	5.189e-24	23.2849		AT3G15300	-1.15216	0.00066592	3.17658
										AT1G80390	1.39619	0.0023409	2.63062		AT5G20740	-1.15163	9.1409e-10	9.03901
										AT1G80440	1.37949	4.6831e-27	26.3295		AT1G23150	-1.15122	0.0011333	2.94566
										AT4G16260	1.37443	1.5917e-22	21.7981		AT4G11080	-1.1511	4.5483e-06	5.34215
										AT5G51530	1.37267	0.00023375	3.63125		AT3G29770	-1.15106	2.4682e-05	4.60762
										AT4G30140	1.36887	9.6529e-08	7.01534		AT5G42880	-1.1507	0.00024826	3.60509
										AT4G17500	1.36288	0.0067286	2.17208		AT5G38120	-1.14955	0.00011839	3.92668
										AT2G39980	1.36033	1.4045e-29	28.8525		AT2G26180	-1.14918	0.0039462	2.40382
										AT5G04340	1.33569	6.1222e-05	4.21309		AT1G20610	-1.14861	1.6885e-05	4.7725
										AT2G35070	1.33345	3.6668e-13	12.4357		AT3G01680	-1.14853	6.4911e-13	12.1877
										AT5G28080	1.33068	0.0018863	2.72439		AT1G64360	-1.14847	7.0374e-06	5.15259
										AT4G23680	1.32688	5.875e-05	4.23099		AT1G27120	-1.14809	0.00017154	3.76563
										AT2G20670	1.31988	4.9022e-08	7.30961		AT2G37040	-1.14793	4.5583e-09	8.3412
										AT3G52450	1.31843	0.00011506	3.93908		AT5G43400	-1.14778	0.0013654	2.86474
										AT3G14680	1.31722	6.6946e-10	9.17428		AT2G30890	-1.14729	0.00050943	3.29292
										AT1G08090	1.314	0.00011031	3.95739		AT5G05270	-1.14703	3.1148e-09	8.50657
										AT3G06355	1.31259	0.00097757	3.00985		AT1G30530	-1.14661	2.7004e-06	5.56857
										AT1G69480	1.30814	0.0029609	2.52858		AT1G02450	-1.14621	0.0024119	2.61764
										AT5G19120	1.29758	8.1761e-12	11.0875		AT5G40640	-1.1457	4.2766e-07	6.3689
										AT2G29350	1.2784	1.2922e-05	4.88867		AT3G17680	-1.14501	7.9117e-06	5.10173
										AT5G15500	1.27136	3.7268e-18	17.4287		AT4G14310	-1.14405	1.1073e-07	6.95573
										AT3G15500	1.26303	8.7108e-11	10.0599		AT1G25250	-1.14398	1.2691e-07	6.8965
										AT1G33960	1.25893	9.782e-09	8.00957		AT1G09000	-1.14277	0.0010233	2.99
										AT3G13950	1.25797	4.1236e-06	5.38472		AT4G29100	-1.14215	6.7848e-11	10.1685
										AT5G35200	1.24449	8.8189e-36	35.0546		AT4G36360	-1.14139	6.4287e-05	4.19188
										AT5G46050	1.24067	9.7311e-06	5.01184		AT3G43270	-1.14012	3.8645e-10	9.41291
										AT5G51465	1.23847	0.009084	2.04172		AT4G15920	-1.13997	1.0684e-13	12.9713
										AT4G23700	1.21422	0.0087219	2.05939		AT5G19730	-1.1396	8.1322e-05	4.08979
										AT4G00700	1.20578	5.6512e-07	6.24786		AT3G60660	-1.13958	7.1367e-05	4.1465
										AT4G04500	1.19742	0.0026811	2.57169		AT4G12880	-1.13955	2.18e-14	13.6615
										AT4G27410	1.18596	7.0151e-15	14.154		AT2G43550	-1.13895	8.4656e-08	7.07234
										AT5G44260	1.1822	2.0404e-13	12.6903		AT4G39950	-1.13864	6.2607e-07	6.20338
										AT2G36780	1.17706	0.0010688	2.9711		AT2G20610	-1.13838	1.1197e-14	13.9509
										AT1G68840	1.15412	2.4542e-08	7.61009		AT3G56810	-1.1378	7.548e-09	8.12217
										AT3G57260	1.13336	3.8727e-09	8.41199		AT3G15400	-1.13758	2.0163e-06	5.69544
										AT1G64110	1.13256	2.516e-09	8.59929		AT3G58650	-1.13711	1.2457e-05	4.90459
										AT2G44100	1.13031	5.9193e-29	28.2277		AT5G38010	-1.13706	0.00031199	3.50586
										AT5G11920	1.11249	0.00055646	3.25457		AT5G02280	-1.13593	7.4782e-05	4.1262
										AT5G27420	1.10848	5.1617e-11	10.2872		AT5G24800	-1.13522	1.4227e-10	9.84689
										AT3G29035	1.09614	6.8502e-12	11.1643		AT2G22330	-1.13507	5.3898e-07	6.26843
										AT1G26420	1.08898	0.0022181	2.65402		AT2G41820	-1.13378	6.5444e-11	10.1841
										AT2G43570	1.0876	2.7319e-10	9.56354		AT1G12200	-1.13342	0.00054912	3.26033
										AT1G66060	1.07684	1.8451e-12	11.734		AT4G39330	-1.13333	9.3052e-05	4.03127
										AT1G30700	1.07597	6.1378e-05	4.21199		AT4G16790	-1.13284	8.5404e-06	5.06852
										AT1G23200	1.07587	1.3425e-06	5.87209		AT2G41310	-1.13214	3.2036e-06	5.49436
										AT4G10500	1.06023	4.408e-06	5.35576		AT5G14230	-1.13065	0.0015945	2.79738
										AT1G26390	1.05526	1.8331e-05	4.73681		AT2G34710	-1.13026	3.5645e-11	10.448
										AT3G04060	1.04836	9.8311e-11	10.0074		AT1G17480	-1.12959	8.5883e-05	4.06609
										AT5G19470	1.04263	2.2749e-07	6.64304		AT1G08180	-1.12955	0.0036762	2.4346
										AT5G64190	1.03579	1.4537e-05	4.83753		AT5G03870	-1.12923	0.00052821	3.27719
										AT2G36770	1.03066	7.472e-05	4.12656		AT4G38660	-1.12901	7.5514e-11	10.122
										AT5G59320	1.00963	1.9259e-15	14.7154		AT1G11120	-1.12711	0.0018249	2.73876
										AT3G22600	1.00917	8.8909e-11	10.0511		AT2G42900	-1.12666	4.8786e-06	5.3117
										AT3G63380	1.00577	2.8071e-07	6.55174		AT5G16190	-1.12661	9.2829e-07	6.03232
															AT5G56580	-1.12656	0.00032896	3.48286
															AT4G36950	-1.12652	0.0039282	2.40581
															AT5G10770	-1.12538	2.2699e-11	10.644
															AT2G21650	-1.1249	7.8538e-08	7.10492
															AT5G52220	-1.12353	0.0017836	2.7487
															AT3G49160	-1.12173	0.00061106	3.21392
															AT1G14440	-1.12133	1.1376e-07	6.94401
															AT5G18690	-1.12033	2.5556e-08	7.59251
															AT1G75640	-1.11979	0.0014203	2.84762
															AT5G02600	-1.11968	1.1505e-09	8.93911
															AT5G48490	-1.11867	7.5362e-06	5.12285
															AT4G16140	-1.11859	2.0571e-09	8.68674
															AT1G72500	-1.11836	1.9228e-06	5.71607
															AT1G09450	-1.11832	0.00096442	3.01573
															AT4G21990	-1.11792	4.8847e-08	7.31116
															AT3G27030	-1.11766	5.8429e-07	6.23337
															AT5G18670	-1.11763	0.00013624	3.8657
															AT2G38530	-1.11759	5.3248e-06	5.2737
															AT5G23810	-1.11733	2.6488e-06	5.57695
															AT5G42680	-1.11724	0.00012972	3.88699
															AT5G02440	-1.1171	0.0080326	2.09514
															AT4G14560	-1.1162	0.0024201	2.61617
															AT5G45520	-1.11554	0.0017579	2.75501
															AT4G12980	-1.11518	3.9471e-05	4.40372
															AT5G58300	-1.11513	1.7798e-09	8.74963
															AT1G19960	-1.11466	5.5975e-05	4.25201
															AT1G68130	-1.11448	6.9782e-09	8.15626
															AT2G32590	-1.1144	0.00084352	3.0739
															AT5G49800	-1.11432	2.7753e-05	4.55669
															AT1G64900	-1.113	0.0014247	2.84628
															AT3G05020	-1.11296	1.0133e-10	9.99426
															AT2G15400	-1.11208	0.0028893	2.53921
															AT1G12160	-1.1111	0.009619	2.01687
															AT1G15580	-1.10789	0.0077803	2.109
															AT5G15780	-1.10747	0.00020142	3.6959
															AT3G42670	-1.10671	0.0084247	2.07445
															AT4G22560	-1.1043	0.00021509	3.66738
															AT5G24280	-1.1039	0.00083875	3.07637
															AT5G65530	-1.10378	0.0051968	2.28426
															AT2G39230	-1.10338	0.0056217	2.25013
															AT3G61750	-1.10214	4.0687e-06	5.39054
															AT3G18773	-1.10212	0.0020592	2.6863
															AT1G54120	-1.10156	0.0037027	2.43148
															AT1G32520	-1.10144	3.5021e-05	4.45567
															AT3G14890	-1.10029	1.8339e-09	8.73662
															AT5G64980	-1.10017	0.00071415	3.14621
															AT2G35600	-1.09969	0.0059606	2.22471
															AT4G13930	-1.09863	1.8374e-10	9.7358
															AT1G79530	-1.09855	1.0213e-08	7.99085
															AT1G26945	-1.09853	0.00016556	3.78104
															AT4G13430	-1.09763	8.9103e-14	13.0501
															AT1G49230	-1.09627	1.9824e-08	7.70281
															AT3G52740	-1.09525	0.0067683	2.16952
															AT5G18080	-1.09501	0.00021802	3.6615
															AT5G57350	-1.09432	4.783e-06	5.3203
															AT1G49620	-1.09352	0.00316	2.50031
															AT1G04770	-1.09324	1.8845e-05	4.7248
															AT2G33793	-1.09283	0.00092599	3.03339
															AT3G08570	-1.09247	0.0043854	2.35799
															AT5G60690	-1.09172	9.9964e-05	4.00016
															AT5G62430	-1.09063	1.4759e-09	8.83094
															AT1G22710	-1.08936	1.713e-13	12.7662
															AT2G31560	-1.08904	1.3611e-05	4.86611
															AT4G32000	-1.08712	1.3546e-08	7.86819
															AT4G38860	-1.08639	3.2365e-07	6.48992
															AT3G56080	-1.08471	0.0005063	3.29559
															AT5G08030	-1.08435	0.0015825	2.80066
															AT5G49300	-1.0841	3.5376e-05	4.45129
															AT2G26690	-1.08277	4.2761e-12	11.369
															AT4G13370	-1.08272	0.00017833	3.74878
															AT5G03495	-1.08117	0.0014029	2.85297
															AT2G23010	-1.07999	2.9647e-09	8.52802
															AT3G57830	-1.0797	4.3809e-05	4.35844
															AT1G14480	-1.07945	8.931e-07	6.0491
															AT2G42730	-1.07882	1.1501e-05	4.93926
															AT5G41460	-1.07809	1.7382e-08	7.7599
															AT2G20100	-1.07809	4.1513e-06	5.38182
															AT3G50070	-1.07761	2.6996e-07	6.5687
															AT5G12110	-1.07747	0.00046952	3.32835
															AT3G03820	-1.0771	9.3132e-05	4.0309
															AT5G43250	-1.07639	0.00012033	3.91963
															AT3G17185	-1.07617	4.2772e-05	4.36884
															AT3G11930	-1.0761	4.7068e-13	12.3273
															AT1G77690	-1.07555	4.0121e-09	8.39663
															AT4G38960	-1.07511	3.7495e-05	4.42603
															AT5G09805	-1.075	0.00044034	3.35621
															AT3G57020	-1.07491	1.5597e-10	9.80696
															AT5G66600	-1.07326	0.0015236	2.81713
															AT2G43445	-1.07308	0.001989	2.70137
															AT1G05640	-1.07293	0.0043364	2.36287
															AT1G03940	-1.0728	9.3671e-05	4.02839
															AT1G05950	-1.07217	0.00019606	3.70761
															AT1G19640	-1.07211	0.0010441	2.98126
															AT1G49870	-1.07192	0.0012983	2.88662
															AT5G44720	-1.0714	1.1985e-12	11.9214
															AT2G37420	-1.07049	1.3212e-05	4.87903
															AT5G18060	-1.07041	5.9443e-05	4.2259
															AT5G01500	-1.06998	1.7302e-10	9.7619
															AT3G18960	-1.06893	0.0014677	2.83336
															AT3G43430	-1.0679	4.3995e-05	4.3566
															AT1G78580	-1.06755	1.4203e-10	9.84762
															AT3G15354	-1.06704	5.9153e-05	4.22802
															AT2G32487	-1.06686	0.0036946	2.43243
															AT2G23150	-1.0643	2.4322e-06	5.614
															AT5G67070	-1.06354	4.2172e-06	5.37498
															AT1G05710	-1.06339	3.7392e-05	4.42722
															AT3G55660	-1.06318	0.00046929	3.32856
															AT1G24100	-1.06232	7.3719e-08	7.13242
															AT5G52570	-1.06142	0.0016176	2.79113
															AT5G47370	-1.06133	0.0043492	2.36159
															AT3G60390	-1.0611	7.113e-06	5.14795
															AT2G25790	-1.06006	1.0872e-06	5.96369
															AT1G54575	-1.05999	0.0069062	2.16076
															AT4G29720	-1.05949	4.8629e-09	8.3131
															AT5G22090	-1.05901	1.6843e-11	10.7736
															AT1G23935	-1.05861	0.00015034	3.82293
															AT3G27400	-1.05831	4.719e-06	5.32615
															AT5G61350	-1.05799	0.0048551	2.3138
															AT1G76410	-1.05792	1.0115e-07	6.99503
															AT4G17760	-1.05755	0.0049853	2.30231
															AT4G24275	-1.05705	0.00031226	3.50548
															AT1G07370	-1.05696	1.2182e-08	7.91428
															AT3G12170	-1.05688	0.00077839	3.1088
															AT3G63530	-1.05659	2.0282e-06	5.69289
															AT3G14550	-1.05564	0.0033422	2.47597
															AT1G23790	-1.05489	0.0015751	2.80269
															AT2G24190	-1.05463	0.00042497	3.37164
															AT3G18560	-1.05374	9.3547e-09	8.02897
															AT1G10850	-1.05322	2.4919e-07	6.60347
															AT3G19370	-1.05253	0.00010778	3.96746
															AT5G45350	-1.05225	1.3688e-12	11.8637
															AT5G15160	-1.05053	1.2287e-05	4.91055
															AT5G59350	-1.04985	6.3718e-06	5.19574
															AT1G21740	-1.04917	0.0023315	2.63236
															AT5G60890	-1.04898	0.0014426	2.84085
															AT5G18270	-1.04838	0.00011179	3.9516
															AT5G64770	-1.04812	0.00052826	3.27715
															AT3G01750	-1.0479	1.1842e-08	7.92657
															AT2G41312	-1.04777	0.00064133	3.19292
															AT1G23890	-1.04772	3.3554e-06	5.47426
															AT3G21510	-1.04702	0.0020554	2.6871
															AT5G08000	-1.04687	3.1595e-09	8.50038
															AT3G61490	-1.04679	0.00031153	3.5065
															AT5G01340	-1.04631	0.0001491	3.82652
															AT4G32690	-1.04602	2.2625e-07	6.64541
															AT2G33850	-1.04568	1.3037e-05	4.88482
															AT4G28330	-1.04427	0.0021918	2.6592
															AT1G31760	-1.04423	0.00073481	3.13382
															AT3G62070	-1.04381	0.0016462	2.78352
															AT5G55820	-1.04374	0.001306	2.88406
															AT1G68570	-1.04373	0.0050852	2.29369
															AT5G43020	-1.04326	4.3016e-07	6.36637
															AT5G54510	-1.04315	2.2993e-10	9.6384
															AT2G01890	-1.04263	0.0036563	2.43696
															AT4G34870	-1.04144	1.8503e-12	11.7328
															AT4G30180	-1.04143	0.0079653	2.0988
															AT4G33400	-1.04028	1.3162e-06	5.88068
															AT3G14170	-1.03927	0.00021254	3.67256
															AT4G10040	-1.03893	1.3466e-09	8.87076
															AT3G25700	-1.0389	2.6516e-07	6.57649
															AT2G21140	-1.03807	3.5009e-07	6.45582
															AT1G54960	-1.03771	0.0028183	2.55001
															AT3G18850	-1.03627	6.9396e-06	5.15867
															AT4G27410	-1.03583	5.2528e-05	4.27961
															AT5G48600	-1.03561	0.0025108	2.60019
															AT2G46590	-1.03521	9.3821e-05	4.0277
															AT3G48160	-1.03413	0.0074939	2.12529
															AT2G16050	-1.03375	6.374e-06	5.19559
															AT5G21950	-1.03309	0.0010276	2.98818
															AT3G22850	-1.03245	4.709e-10	9.32707
															AT3G04630	-1.03239	6.544e-09	8.18416
															AT1G29170	-1.03235	1.4847e-05	4.82836
															AT5G37000	-1.03201	8.2529e-05	4.08339
															AT4G22160	-1.03153	2.0548e-08	7.68723
															AT3G49680	-1.03026	7.56e-12	11.1215
															AT2G41240	-1.03021	0.0055037	2.25935
															AT5G42980	-1.02987	1.6861e-12	11.7731
															AT1G13609	-1.02816	1.8253e-05	4.73867
															AT1G22470	-1.02809	0.0034477	2.46247
															AT1G23880	-1.02768	0.00055714	3.25404
															AT1G50240	-1.02749	0.0008334	3.07915
															AT5G62680	-1.0271	6.9155e-10	9.16018
															AT3G28070	-1.02703	1.4878e-07	6.82746
															AT1G06490	-1.02697	0.00020284	3.69285
															AT1G49010	-1.02654	0.0054306	2.26515
															AT3G01410	-1.02608	3.3691e-05	4.47249
															AT2G28510	-1.02602	3.7967e-09	8.42059
															AT4G34770	-1.02539	0.00036401	3.43889
															AT3G27360	-1.02535	8.1164e-05	4.09064
															AT3G22880	-1.02509	0.0043514	2.36137
															AT1G25422	-1.02507	0.0007419	3.12965
															AT3G52910	-1.0249	4.5632e-05	4.34073
															AT5G43080	-1.02483	0.0032346	2.49018
															AT2G32880	-1.02271	1.3574e-06	5.86729
															AT2G22470	-1.02181	2.3695e-05	4.62534
															AT2G29890	-1.02123	4.4617e-05	4.3505
															AT5G50370	-1.02007	2.3079e-08	7.63678
															AT3G05470	-1.02003	0.00029503	3.53013
															AT5G59970	-1.02	4.9342e-10	9.30678
															AT1G56210	-1.01987	3.9038e-05	4.40851
															AT2G47010	-1.01919	0.00086303	3.06397
															AT5G37478	-1.01881	0.0057352	2.24145
															AT5G19090	-1.01846	1.7628e-09	8.7538
															AT1G64690	-1.01834	0.00037512	3.42583
															AT3G17420	-1.01786	0.00051849	3.28526
															AT2G46340	-1.01592	0.00017665	3.75289
															AT1G43910	-1.0159	0.0051955	2.28437
															AT3G47460	-1.01531	0.00025297	3.59693
															AT5G42200	-1.01522	3.276e-08	7.48466
															AT1G19490	-1.0139	0.0075176	2.12392
															AT3G23670	-1.01355	0.001012	2.99482
															AT3G46320	-1.01354	9.7705e-10	9.01008
															AT1G48330	-1.01323	0.00011971	3.92187
															AT2G42975	-1.0126	0.0025227	2.59813
															AT2G27510	-1.01249	1.3778e-09	8.86081
															AT1G14210	-1.01246	1.1761e-08	7.92956
															AT3G12730	-1.01114	0.00015988	3.79621
															AT1G77720	-1.01097	3.4996e-06	5.45598
															AT2G18160	-1.00871	8.4975e-10	9.07071
															AT4G30800	-1.00678	2.0719e-06	5.68363
															AT5G17700	-1.00568	4.1416e-09	8.38283
															AT4G26850	-1.00506	2.484e-09	8.60485
															AT1G30600	-1.00403	1.0028e-05	4.99879
															AT5G01170	-1.00399	1.8726e-05	4.72755
															AT1G05470	-1.00341	8.2357e-05	4.0843
															AT2G17260	-1.00301	0.00024303	3.61434
															AT5G14690	-1.00281	0.0027981	2.55314
															AT3G53370	-1.00252	3.1167e-05	4.5063
															AT5G64170	-1.00148	4.419e-07	6.35468
															AT1G16730	-1.00137	0.00030533	3.51523
															AT3G20820	-0.999933	1.5638e-06	5.80582
															AT1G12420	1.00286	1.0151e-07	6.99349
															AT4G18195	1.0064	4.9882e-08	7.30206
															AT4G24040	1.0081	5.5083e-09	8.25898
															AT1G59710	1.01004	1.3213e-10	9.879
															AT5G37710	1.01553	3.6468e-09	8.43809
															AT5G64110	1.01691	2.5071e-07	6.60083
															AT3G15356	1.01718	0.00011618	3.93487
															AT5G47590	1.0173	0.00094074	3.02653
															AT2G44100	1.01859	2.3241e-17	16.6337
															AT5G06850	1.02388	5.9472e-13	12.2257
															AT3G49620	1.02416	3.4777e-05	4.45871
															AT5G57655	1.02428	5.611e-13	12.251
															AT3G14470	1.02596	7.7456e-10	9.11094
															AT1G58190	1.02965	7.78e-08	7.10902
															AT2G01850	1.0338	4.8976e-09	8.31002
															AT5G25250	1.03895	0.0013854	2.85842
															AT1G59865	1.04067	0.00032891	3.48292
															AT4G37220	1.04084	0.0018278	2.73807
															AT3G28210	1.04255	2.396e-09	8.62051
															AT4G18990	1.04417	0.0096595	2.01505
															AT4G13340	1.04604	1.1807e-07	6.92786
															AT5G07100	1.04879	2.8872e-10	9.53952
															AT1G35350	1.05151	0.00057306	3.2418
															AT3G28310	1.05289	1.0186e-07	6.992
															AT4G02380	1.05389	8.1471e-08	7.089
															AT1G13880	1.05496	1.5361e-06	5.81358
															AT3G01080	1.05621	8.5941e-13	12.0658
															AT2G29460	1.05622	3.8238e-05	4.4175
															AT2G47140	1.05778	0.0015565	2.80785
															AT1G19480	1.0584	1.365e-15	14.8649
															AT5G51465	1.06052	4.3978e-08	7.35676
															AT3G56000	1.06127	1.266e-05	4.89757
															AT1G22890	1.0629	7.258e-07	6.13918
															AT5G08150	1.06327	8.6736e-07	6.0618
															AT1G22882	1.06354	0.00053167	3.27436
															AT3G02800	1.06449	1.448e-08	7.83923
															AT4G31000	1.06537	0.0015661	2.80518
															AT3G48630	1.07585	5.4637e-08	7.26251
															AT5G39670	1.0806	0.00042336	3.37329
															AT1G15125	1.08234	4.2526e-14	13.3713
															AT5G11160	1.08544	1.0376e-08	7.98397
															AT4G35180	1.09512	0.003555	2.44916
															AT5G40450	1.10024	0.0013784	2.86062
															Novel00176	1.10121	0.009323	2.03044
															AT2G34510	1.10126	1.6012e-11	10.7956
															AT4G30140	1.10229	2.9902e-06	5.5243
															AT1G26380	1.10506	0.0038154	2.41846
															AT1G57630	1.10621	0.00011376	3.94401
															AT3G10280	1.10665	0.0077269	2.11199
															AT1G62400	1.11248	1.052e-08	7.97798
															AT2G46720	1.11819	4.2579e-11	10.3708
															AT5G51480	1.11912	8.388e-07	6.07634
															AT1G15520	1.11996	0.004241	2.37253
															AT5G38900	1.13177	4.0048e-06	5.39742
															AT4G04540	1.13229	0.0030938	2.50951
															AT4G32650	1.13458	0.0001023	3.99012
															AT1G10990	1.13856	1.0425e-10	9.98192
															AT5G54380	1.14167	1.5422e-06	5.81186
															AT1G02620	1.14529	8.0497e-05	4.09422
															AT3G24420	1.14636	2.5709e-13	12.5899
															AT5G40780	1.15013	4.7163e-08	7.3264
															AT5G24200	1.15267	0.00040168	3.39612
															AT3G50480	1.15295	2.1266e-08	7.67231
															AT1G79700	1.15861	1.0189e-11	10.9919
															AT5G28080	1.16002	0.0039697	2.40124
															AT1G62510	1.16314	6.1486e-07	6.21122
															AT4G11470	1.16828	0.0018508	2.73264
															AT5G37490	1.16969	0.0032018	2.49461
															AT1G55420	1.16977	0.006536	2.18469
															AT5G55930	1.17266	5.5751e-11	10.2537
															Novel00002	1.17905	9.4937e-23	22.0226
															AT4G21120	1.17978	5.4083e-05	4.26694
															AT3G47340	1.18062	1.925e-07	6.71557
															AT5G44020	1.18095	4.3311e-13	12.3634
															AT2G34770	1.18309	9.4414e-10	9.02496
															AT5G06530	1.1859	5.9482e-22	21.2256
															AT5G25910	1.18832	1.1783e-05	4.92874
															AT1G23200	1.18875	1.6458e-09	8.78362
															AT2G48030	1.19372	1.3108e-21	20.8825
															AT1G55390	1.19729	0.00050242	3.29893
															AT3G11402	1.19896	3.3864e-08	7.47026
															AT1G64110	1.19975	1.7933e-10	9.74635
															AT4G01720	1.20083	2.0483e-12	11.6886
															AT1G66930	1.2046	0.0019366	2.71296
															AT2G31020	1.20463	5.4126e-05	4.26659
															AT4G14630	1.20697	0.0081547	2.08859
															AT5G11920	1.20872	5.7589e-05	4.23966
															AT1G17665	1.21443	2.335e-18	17.6317
															AT5G56960	1.2146	0.0012879	2.89012
															AT4G15233	1.21734	1.3352e-07	6.87445
															AT4G05685	1.21887	0.0087386	2.05856
															AT4G00700	1.22597	1.1846e-06	5.92643
															AT1G67520	1.22725	0.0001109	3.95507
															AT4G25110	1.23007	7.6057e-19	18.1189
															AT5G23210	1.23329	3.7185e-14	13.4296
															AT5G65600	1.23341	0.00035537	3.44932
															AT3G13950	1.23562	4.4338e-09	8.35322
															AT3G28580	1.2372	9.1459e-12	11.0388
															AT5G35200	1.24673	3.8963e-25	24.4093
															AT2G23910	1.2473	1.5009e-07	6.82365
															AT3G01290	1.24996	3.4986e-10	9.45611
															AT3G26830	1.25075	8.0674e-05	4.09327
															AT2G18660	1.25368	9.177e-20	19.0373
															AT4G20780	1.25534	1.2345e-08	7.90851
															AT4G31230	1.25932	0.002612	2.58303
															AT4G04500	1.26243	0.00057651	3.23919
															AT4G01750	1.26337	1.3889e-09	8.85733
															AT2G02930	1.26579	5.8208e-10	9.23502
															AT1G68862	1.26907	0.0041492	2.38204
															AT3G09940	1.27637	0.0037976	2.42049
															AT1G22990	1.2773	2.3326e-06	5.63216
															AT1G15380	1.27945	0.0033155	2.47945
															AT3G52310	1.27965	0.00010781	3.96734
															AT5G37740	1.28368	1.1967e-17	16.922
															AT3G45060	1.29072	7.9565e-06	5.09928
															AT1G02930	1.29573	1.245e-24	23.9048
															AT2G31010	1.30138	9.9068e-05	4.00407
															AT1G67980	1.30584	1.9532e-11	10.7093
															AT5G49360	1.30676	6.1156e-12	11.2136
															AT4G10500	1.3068	0.00065376	3.18458
															AT4G35380	1.3109	0.00068278	3.16572
															AT3G54150	1.31092	0.0019022	2.72074
															AT1G02920	1.31709	2.6289e-23	22.5802
															AT3G58620	1.31733	1.0654e-13	12.9725
															AT2G43570	1.32364	2.1646e-18	17.6646
															AT1G16090	1.32829	0.00079716	3.09845
															AT5G51530	1.33198	0.00122	2.91364
															AT1G21240	1.33482	0.00011911	3.92405
															AT5G61160	1.34031	4.9263e-08	7.30748
															AT1G02850	1.34112	3.2264e-09	8.49128
															AT1G09500	1.35428	2.7568e-07	6.55959
															AT3G26500	1.36595	3.5746e-10	9.44677
															AT5G20250	1.36619	3.3102e-10	9.48015
															AT3G14680	1.37789	8.2366e-11	10.0843
															AT3G57260	1.38051	1.3418e-27	26.8723
															AT3G62150	1.38213	0.0013436	2.87173
															AT2G26560	1.39062	1.3252e-14	13.8777
															AT1G22530	1.40237	4.2592e-05	4.37067
															AT2G37025	1.40564	9.6295e-07	6.0164
															AT2G42040	1.40577	3.2935e-17	16.4823
															AT1G43000	1.41257	5.8587e-05	4.2322
															AT5G52740	1.41477	4.9646e-07	6.30412
															AT4G23310	1.42409	0.00017136	3.76609
															AT4G18250	1.43395	5.419e-10	9.26608
															AT4G35770	1.43934	3.2382e-31	30.4897
															AT1G02440	1.44114	0.0036476	2.43799
															AT2G28630	1.44198	8.3709e-11	10.0772
															AT5G03120	1.45234	6.7574e-07	6.17022
															AT3G63380	1.45704	2.0738e-13	12.6832
															AT1G33960	1.48209	0.0088541	2.05286
															AT1G76090	1.48861	1.6016e-09	8.79545
															AT3G50140	1.49299	8.36e-15	14.0778
															AT2G16660	1.49987	1.3663e-23	22.8645
															AT5G38250	1.50035	0.00036831	3.43379
															AT1G11260	1.51039	3.0421e-08	7.51683
															AT3G44300	1.5128	1.6425e-10	9.78449
															AT2G01530	1.5201	2.0516e-05	4.68791
															AT1G47890	1.52044	0.0010522	2.9779
															AT3G13790	1.56795	6.1646e-11	10.2101
															AT4G14130	1.57798	3.76e-06	5.42481
															AT1G22740	1.59431	6.4716e-28	27.189
															AT1G66960	1.61323	0.0044293	2.35366
															AT4G16260	1.62288	4.0765e-24	23.3897
															AT3G09790	1.63138	0.0055575	2.25512
															AT5G40230	1.63307	2.3163e-07	6.63521
															AT4G21840	1.63509	3.7717e-06	5.42346
															AT5G24270	1.63738	5.6169e-21	20.2505
															AT3G12910	1.64011	0.0017172	2.76518
															AT3G21500	1.66148	0.009082	2.04182
															AT1G51890	1.70477	6.5512e-06	5.18368
															AT5G42900	1.73023	7.2808e-28	27.1378
															AT3G23550	1.75261	2.0844e-11	10.681
															AT1G30700	1.77341	0.0035167	2.45386
															Novel00168	1.77564	1.9671e-08	7.70617
															AT3G55500	1.79887	4.9495e-11	10.3054
															AT1G16420	1.80281	2.9028e-06	5.53718
															AT2G33710	1.81147	1.6406e-07	6.785
															AT2G14610	1.81436	1.8365e-05	4.73601
															AT5G23160	1.82029	0.0047821	2.32038
															AT4G39070	1.82872	1.309e-14	13.8831
[truncated: 36 more rows]
