# Supplementary material for: Differential Regulation of the Ribosomal Association of mRNA Transcripts in an Arabidopsis Mutant Defective in Jasmonate-Dependent Wound Response
Source: Front Plant Sci. 2021 Mar 11;12:637959. doi: 10.3389/fpls.2021.637959 (PMC7990880; doi:10.3389/fpls.2021.637959)
Supplement: Supplementary Table 5 — GO Enrichment Analysis of genes with transcripts that are differentially associating with the ribosomes (TRAP/total RNA) in unwounded and wounded Wt leaves. [file Table_5.XLSX]

## Sheet: Suppl. Table S5
Supplementary Table S5. GO Enrichment Analysis of genes with transcripts that are differentially associating with the ribosomes (TRAP / total RNA) in unwounded and wounded WT leaves.
In common: Upregulated	GO_accession	Description	Over_represented_pValue	Fold Enrichment	Arabidopsis thaliana - REFLIST (27462)	Number of Genes in GO term category	Gene_names
	GO:0032890	regulation of organic acid transport	0.0373	87.83	7	3	AT2G24762,AT5G57685,AT5G38770
	GO:0051955	regulation of amino acid transport	0.0373	87.83	7	3	AT2G24762,AT5G57685,AT5G38770
	GO:0051952	regulation of amine transport	0.0373	87.83	7	3	AT2G24762,AT5G57685,AT5G38770
	GO:0080143	regulation of amino acid export	0.0373	87.83	7	3	AT2G24762,AT5G57685,AT5G38770
	GO:1903789	regulation of amino acid transmembrane transport	0.0373	87.83	7	3	AT2G24762,AT5G57685,AT5G38770
	GO:0006878	cellular copper ion homeostasis	0.00263	68.31	12	4	AT3G15353,AT5G20650,AT3G56240,AT3G09390
	GO:0055070	copper ion homeostasis	0.0103	45.54	18	4	AT3G15353,AT5G20650,AT3G56240,AT3G09390
	GO:0098869	cellular oxidant detoxification	0.0327	32.79	25	4	AT3G49580,AT3G49570,AT5G24655,AT5G24660
	GO:0016144	S-glycoside biosynthetic process	0.00666	26.27	39	5	AT1G65860,AT2G43100,AT1G16400,AT3G58990,AT5G23020
	GO:0019761	glucosinolate biosynthetic process	0.00666	26.27	39	5	AT1G65860,AT2G43100,AT1G16400,AT3G58990,AT5G23020
	GO:0019758	glycosinolate biosynthetic process	0.00666	26.27	39	5	AT1G65860,AT2G43100,AT1G16400,AT3G58990,AT5G23020
	GO:1901659	glycosyl compound biosynthetic process	0.0432	17.37	59	5	AT1G65860,AT2G43100,AT1G16400,AT3G58990,AT5G23020
	GO:0055076	transition metal ion homeostasis	0.029	12.94	95	6	AT3G15353,AT5G20650,AT3G56240,AT4G34600,AT3G09390,AT1G76800
	GO:0044550	secondary metabolite biosynthetic process	0.0267	9.96	144	7	AT1G65860,AT2G43100,AT1G16400,AT3G58990,AT5G04230,AT5G23020,AT4G37970
	GO:0006952	defense response	0.0133	3.67	949	17	AT1G35310,AT2G30860,AT1G64700,AT1G35260,AT4G12470,AT1G45145,AT5G24660,AT2G02130,AT1G03850,AT4G37290,AT4G30650,AT1G12200,AT1G70890,AT2G23270,AT3G12500,AT3G50970,AT5G04230
	GO:0009605	response to external stimulus	0.00358	3.13	1507	23	AT5G64770,AT3G49580,AT2G40080,AT1G66480,AT2G30860,AT1G64700,AT5G12140,AT1G70800,AT2G33830,AT4G12470,AT4G10380,AT1G45145,AT5G24660,AT1G03850,AT4G37290,AT4G30650,AT5G57685,AT1G12200,AT1G16510,AT1G47485,AT2G23270,AT3G12500,AT3G50970
	GO:0042221	response to chemical	0.0397	2.3	2676	30	AT5G07460,AT3G49580,AT5G15960,AT2G05520,AT2G30860,AT3G49570,AT5G12140,AT5G24655,AT5G15970,AT4G10380,AT1G45145,AT5G24660,AT5G25890,AT3G02885,AT5G40370,AT1G03850,AT5G20650,AT3G56240,AT1G75750,AT4G34600,AT3G05880,AT4G29080,AT1G47485,AT2G23270,AT3G12500,AT3G50970,AT5G12330,AT1G76800,AT4G35480,AT5G59320
	GO:0006950	response to stress	0.0405	2.18	3100	33	AT5G07460,AT3G49580,AT5G15960,AT4G38580,AT2G05520,AT1G35310,AT2G30860,AT1G64700,AT1G35260,AT5G12140,AT5G15970,AT4G12470,AT1G45145,AT5G24660,AT3G02885,AT5G19875,AT2G02130,AT5G40370,AT1G03850,AT4G37290,AT3G56240,AT4G30650,AT1G12200,AT1G70890,AT3G05880,AT1G47485,AT2G23270,AT3G12500,AT3G50970,AT5G04230,AT4G04810,AT4G04830,AT5G59320
	GO:0050896	response to stimulus	4.24e-05	2.07	5538	56	AT5G64770,AT5G07460,AT3G49580,AT5G15960,AT2G40080,AT4G38580,AT1G66480,AT2G05520,AT1G35310,AT2G30860,AT3G49570,AT1G64700,AT1G35260,AT5G12140,AT1G70800,AT5G24655,AT5G15970,AT2G33830,AT4G12470,AT4G10380,AT1G45145,AT5G24660,AT5G25890,AT3G02885,AT3G55370,AT5G19875,AT5G58500,AT3G03000,AT2G02130,AT5G40370,AT1G03850,AT4G37290,AT5G20650,AT5G06850,AT3G56240,AT1G46480,AT4G30650,AT5G57685,AT1G12200,AT1G75750…
In common: Downregulated	GO_accession	Description	Over_represented_pValue	Fold Enrichment	Arabidopsis thaliana - REFLIST (27462)	Number of Genes in GO term category	Gene_names
	GO:0090436	leaf pavement cell development	0.0253	47.35	5	4	AT5G43900,AT1G17580,AT5G20490,AT5G55390
	GO:0015990	electron transport coupled proton transport	0.00924	29.59	10	5	ATMG00580,ATCG01010,ATCG00430,ATCG01050,ATMG01360
	GO:0015988	energy coupled proton transmembrane transport, against electrochemical gradient	0.00924	29.59	10	5	ATMG00580,ATCG01010,ATCG00430,ATCG01050,ATMG01360
	GO:0099515	actin filament-based transport	9.4e-09	29.59	22	11	AT2G20290,AT1G08730,AT5G65460,AT3G58160,AT4G33200,AT5G43900,AT1G17580,AT5G20490,AT4G27370,AT1G04160,AT5G10470
	GO:0030050	vesicle transport along actin filament	9.15e-07	29.59	18	9	AT2G20290,AT1G08730,AT3G58160,AT4G33200,AT5G43900,AT1G17580,AT5G20490,AT4G27370,AT1G04160
	GO:0030048	actin filament-based movement	1.37e-08	28.31	23	11	AT2G20290,AT1G08730,AT5G65460,AT3G58160,AT4G33200,AT5G43900,AT1G17580,AT5G20490,AT4G27370,AT1G04160,AT5G10470
	GO:0099518	vesicle cytoskeletal trafficking	1.33e-06	28.04	19	9	AT2G20290,AT1G08730,AT3G58160,AT4G33200,AT5G43900,AT1G17580,AT5G20490,AT4G27370,AT1G04160
	GO:0030705	cytoskeleton-dependent intracellular transport	5.94e-11	25.11	33	14	AT2G20290,AT3G63480,AT1G08730,AT5G27950,AT5G65460,AT3G58160,AT4G33200,AT5G43900,AT1G17580,AT5G20490,AT4G27370,AT1G04160,AT4G26660,AT5G10470
	GO:0006928	movement of cell or subcellular component	9.51e-26	20.81	91	32	AT5G65930,AT3G23670,AT2G20290,AT1G72250,AT3G63480,AT1G08730,AT3G10180,AT2G28620,AT4G05190,AT3G50240,AT4G14150,AT2G22610,AT4G24170,AT5G27950,AT5G65460,AT3G44050,AT3G58160,AT3G20150,AT4G33200,AT5G43900,AT1G17580,AT4G21270,AT3G19050,AT5G20490,AT2G36200,AT4G27370,AT1G04160,AT3G17360,AT5G60930,AT1G18370,AT4G26660,AT5G10470,
	GO:0007018	microtubule-based movement	1.45e-17	20.02	68	23	AT5G65930,AT3G23670,AT1G72250,AT3G63480,AT3G10180,AT2G28620,AT4G05190,AT3G50240,AT4G14150,AT2G22610,AT4G24170,AT5G27950,AT5G65460,AT3G44050,AT3G20150,AT4G21270,AT3G19050,AT2G36200,AT3G17360,AT5G60930,AT1G18370,AT4G26660,AT5G10470
	GO:0051650	establishment of vesicle localization	2.71e-05	18.37	29	9	AT2G20290,AT1G08730,AT3G58160,AT4G33200,AT5G43900,AT1G17580,AT5G20490,AT4G27370,AT1G04160
	GO:0051648	vesicle localization	2.71e-05	18.37	29	9	AT2G20290,AT1G08730,AT3G58160,AT4G33200,AT5G43900,AT1G17580,AT5G20490,AT4G27370,AT1G04160
	GO:0000911	cytokinesis by cell plate formation	1.89e-07	12.37	67	14	AT3G23670,AT2G28620,AT5G18700,AT5G51600,AT4G14150,AT1G50240,AT2G35630,AT1G53140,AT3G19050,AT1G01040,AT3G17360,AT4G22970,AT1G18370,AT5G10470
	GO:0000281	mitotic cytokinesis	0.00328	11.84	40	8	AT3G23670,AT2G28620,AT5G18700,AT4G14150,AT4G15320,AT3G19050,AT2G22125,AT3G17360,
	GO:0061640	cytoskeleton-dependent cytokinesis	0.000328	10.76	55	10	AT3G23670,AT2G28620,AT5G18700,AT4G14150,AT4G15320,AT1G50240,AT2G35630,AT3G19050,AT2G22125,AT3G17360
	GO:0009767	photosynthetic electron transport chain	0.00717	10.52	45	8	ATCG00280,ATCG00270,ATCG00680,ATCG00600,ATCG00730,ATCG00540,ATCG00580,ATCG00020
	GO:0000910	cytokinesis	3.58e-08	9.96	101	17	AT3G23670,AT2G28620,AT5G18700,AT5G51600,AT4G14150,AT4G15320,AT3G44050,AT1G50240,AT2G35630,AT1G53140,AT3G19050,AT1G01040,AT2G22125,AT3G17360,AT4G22970,AT1G18370,AT5G10470
	GO:0006754	ATP biosynthetic process	0.0448	9.86	42	7	ATCG00140,ATCG00480,ATCG00130,ATCG00120,ATMG01090,ATMG01170,ATCG00470
	GO:0015986	ATP synthesis coupled proton transport	0.0448	9.86	42	7	ATCG00140,ATCG00480,ATCG00130,ATCG00120,ATMG01090,ATMG01170,ATCG00470
	GO:0015985	energy coupled proton transport, down electrochemical gradient	0.0448	9.86	42	7	ATCG00140,ATCG00480,ATCG00130,ATCG00120,ATMG01090,ATMG01170,ATCG00470
	GO:0009145	purine nucleoside triphosphate biosynthetic process	0.0144	9.47	50	8	ATCG00150,ATCG00140,ATCG00480,ATCG00130,ATCG00120,ATMG01090,ATMG01170,ATCG00470
	GO:0009144	purine nucleoside triphosphate metabolic process	0.0212	8.93	53	8	ATCG00150,ATCG00140,ATCG00480,ATCG00130,ATCG00120,ATMG01090,ATMG01170,ATCG00470
	GO:1902600	proton transmembrane transport	9.65e-06	8.81	94	14	ATCG00140,ATMG00580,ATCG00480,AT1G17260,ATCG00130,ATCG00120,AT3G42640,ATMG01090,ATCG01010,ATMG01170,ATCG00430,ATCG00470,ATCG01050,ATMG01360
	GO:0051656	establishment of organelle localization	3.84e-05	8.74	88	13	AT2G20290,AT1G08730,AT1G67120,AT5G65460,AT3G58160,AT4G33200,AT5G43900,AT1G17580,AT5G20490,AT4G27370,AT1G04160,AT5G38150,AT5G10470
	GO:0006119	oxidative phosphorylation	0.0305	8.46	56	8	ATMG00580,ATCG00480,ATCG00130,ATMG00160,ATCG01010,AT2G07727,ATCG00470,ATMG01360
	GO:0022900	electron transport chain	9.86e-06	7.93	112	15	ATCG00280,ATCG00270,ATCG00680,ATCG00600,ATMG00580,ATCG00730,ATMG00160,ATCG00540,ATCG00580,ATCG01010,ATCG00720,AT2G07727,AT2G07718,ATCG00020,ATMG01360
	GO:0007017	microtubule-based process	1.55e-12	7.53	228	29	AT5G65930,AT1G20570,AT3G23670,AT1G72250,AT3G63480,AT3G10180,AT2G28620,AT4G05190,AT5G18700,AT3G50240,AT5G51600,AT4G14150,AT2G22610,AT4G24170,AT5G27950,AT5G65460,AT3G44050,AT3G20150,AT2G35630,AT4G21270,AT3G19050,AT2G36200,AT2G22125,AT3G17360,AT5G60930,AT1G18370,AT2G20815,AT4G26660,AT5G10470
	GO:0030029	actin filament-based process	8.03e-05	7.33	113	14	AT2G20290,AT1G08730,AT5G65460,AT3G58160,AT5G18410,AT4G33200,AT5G43900,AT1G17580,AT5G01730,AT5G20490,AT4G27370,AT1G04160,AT4G18600,AT5G10470
	GO:0090626	plant epidermis morphogenesis	0.00253	7.32	89	11	AT1G80080,AT1G34245,AT5G62230,AT1G05230,AT5G18410,AT5G43900,AT1G03060,AT1G17580,AT1G04110,AT5G20490,AT5G23940
	GO:0140013	meiotic nuclear division	0.000342	7.12	108	13	AT3G23670,AT5G15540,AT3G63480,AT1G22260,AT4G14150,AT3G23890,AT1G50240,AT5G52290,AT4G21270,AT1G65010,AT1G20720,AT4G22970,AT1G22275
	GO:0019684	photosynthesis, light reaction	4.61e-05	6.99	127	15	ATCG00280,ATCG00220,ATCG00270,ATCG00680,ATCG00600,ATCG00730,ATCG00360,ATCG00540,ATCG00580,ATCG00720,ATCG00340,ATCG00080,ATCG00020,ATCG00710,ATCG00520
	GO:0030036	actin cytoskeleton organization	0.00158	6.83	104	12	AT2G20290,AT1G08730,AT3G58160,AT5G18410,AT4G33200,AT5G43900,AT1G17580,AT5G01730,AT5G20490,AT4G27370,AT1G04160,AT4G18600
	GO:0051321	meiotic cell cycle	1.32e-06	6.61	170	19	AT1G20570,AT3G23670,AT5G15540,AT3G63480,AT5G07280,AT5G18700,AT1G02065,AT1G22260,AT4G14150,AT3G23890,AT1G50240,AT5G52290,AT2G31970,AT4G21270,AT1G65010,AT1G20720,AT4G22970,AT5G40820,AT1G22275
	GO:0015979	photosynthesis	1.61e-07	6.61	188	21	ATCG00350,ATCG00280,ATCG00220,ATCG00270,ATCG00680,ATCG01100,ATCG00600,ATCG00730,ATCG00360,ATCG00540,ATCG00580,ATCG00690,ATCG01010,ATCG00720,ATCG00440,ATCG00340,ATCG00080,ATCG01080,ATCG00020,ATCG00710,ATCG00520
	GO:1903046	meiotic cell cycle process	1.29e-05	6.53	154	17	AT3G23670,AT5G15540,AT3G63480,AT5G07280,AT5G18700,AT1G02065,AT1G22260,AT4G14150,AT3G23890,AT1G50240,AT5G52290,AT2G31970,AT4G21270,AT1G65010,AT1G20720,AT4G22970,AT1G22275
	GO:0051301	cell division	2.79e-08	6.48	210	23	AT3G23670,AT1G80080,AT2G28620,AT5G18700,AT5G51600,AT4G14150,AT4G15320,AT3G44050,AT1G50240,AT2G26890,AT5G60880,AT2G35630,AT1G53140,AT1G17580,AT3G19050,AT5G20490,AT4G32700,AT1G01040,AT2G22125,AT3G17360,AT4G22970,AT1G18370,AT5G10470
	GO:0007015	actin filament organization	0.0226	6.43	92	10	AT2G20290,AT1G08730,AT3G58160,AT5G18410,AT4G33200,AT5G43900,AT1G17580,AT5G20490,AT4G27370,AT1G04160
	GO:0000280	nuclear division	2.59e-05	6.21	162	17	AT3G54670,AT3G23670,AT5G15540,AT3G63480,AT1G22260,AT5G51600,AT4G14150,AT3G23890,AT1G50240,AT2G32590,AT5G52290,AT2G35630,AT4G21270,AT1G65010,AT1G20720,AT4G22970,AT1G22275
	GO:0098813	nuclear chromosome segregation	0.0442	5.92	100	10	AT3G54670,AT5G15540,AT3G63480,AT1G22260,AT3G23890,AT2G32590,AT5G52290,AT4G22970,AT5G07660,AT1G22275
	GO:0097435	supramolecular fiber organization	0.000511	5.73	155	15	AT1G20570,AT2G20290,AT1G08730,AT2G28620,AT5G51600,AT3G58160,AT5G18410,AT4G33200,AT5G43900,AT2G35630,AT1G17580,AT5G20490,AT4G27370,AT1G04160,AT2G22125
	GO:0022402	cell cycle process	4.32e-14	5.64	420	40	AT3G54670,AT1G20570,AT3G23670,AT5G15540,AT2G01905,AT3G63480,AT5G07280,AT2G28620,AT4G05190,AT5G18700,AT1G02065,AT3G50240,AT1G22260,AT5G51600,AT4G14150,AT4G15320,AT3G23890,AT3G44050,AT1G50240,AT2G32590,AT5G52290,AT2G31970,AT2G35630,AT1G53140,AT4G21270,AT1G65010,AT3G19050,AT5G67100,AT1G20720,AT1G01040,AT1G34460,AT2G22125,AT3G17360,AT4G22970,AT5G60930,AT1G18370,AT2G20815,AT5G07660,AT5G10470,AT1G22275
	GO:0015672	monovalent inorganic cation transport	0.000263	5.6	169	16	AT5G55470,ATCG00140,ATMG00580,ATCG00480,AT1G17260,ATCG00130,ATCG00120,AT3G42640,ATMG01090,ATCG01010,ATMG01170,ATCG00430,ATCG00470,ATCG01050,ATMG01360,AT3G17630
	GO:0006164	purine nucleotide biosynthetic process	0.0287	5.56	117	11	ATCG00500,AT1G36160,ATCG00150,AT1G36180,ATCG00140,ATCG00480,ATCG00130,ATCG00120,ATMG01090,ATMG01170,ATCG00470
	GO:0007049	cell cycle	2.12e-14	5.44	457	42	AT3G54670,AT1G20570,AT3G23670,AT5G15540,AT2G01905,AT3G63480,AT5G07280,AT2G28620,AT4G05190,AT5G18700,AT1G02065,AT3G50240,AT1G22260,AT5G51600,AT4G14150,AT4G15320,AT3G23890,AT3G44050,AT1G50240,AT2G32590,AT5G52290,AT2G31970,AT2G35630,AT1G53140,AT4G21270,AT1G65010,AT1G08260,AT3G19050,AT5G67100,AT1G20720,AT1G01040,AT1G34460,AT2G22125,AT3G17360,AT4G22970,AT5G60930,AT1G18370,AT2G20815,AT5G40820,AT5G07660…
	GO:0007010	cytoskeleton organization	4.69e-08	5.44	283	26	AT1G20570,AT3G23670,AT2G20290,AT1G08730,AT2G28620,AT4G05190,AT5G18700,AT3G50240,AT5G51600,AT4G14150,AT3G58160,AT5G18410,AT4G33200,AT5G43900,AT2G35630,AT1G17580,AT4G21270,AT5G01730,AT3G19050,AT5G20490,AT4G27370,AT1G04160,AT2G22125,AT4G18600,AT5G60930,AT2G20815
	GO:0072522	purine-containing compound biosynthetic process	0.0443	5.29	123	11	ATCG00500,AT1G36160,ATCG00150,AT1G36180,ATCG00140,ATCG00480,ATCG00130,ATCG00120,ATMG01090,ATMG01170,ATCG00470
	GO:1903047	mitotic cell cycle process	0.000105	5.25	203	18	AT3G54670,AT3G23670,AT5G15540,AT2G01905,AT2G28620,AT5G18700,AT3G50240,AT4G14150,AT4G15320,AT3G23890,AT2G32590,AT2G35630,AT3G19050,AT5G67100,AT1G34460,AT2G22125,AT3G17360,AT5G60930
	GO:0045333	cellular respiration	0.0239	5.15	138	12	ATCG01100,ATMG00580,ATCG00130,ATMG00160,ATCG01010,ATCG00720,AT2G07727,ATCG00430,AT2G07718,ATCG00470,ATCG01050,ATMG01360
	GO:0000226	microtubule cytoskeleton organization	0.00523	5.05	164	14	AT1G20570,AT3G23670,AT2G28620,AT4G05190,AT5G18700,AT3G50240,AT5G51600,AT4G14150,AT2G35630,AT4G21270,AT3G19050,AT2G22125,AT5G60930,AT2G20815
	GO:0051640	organelle localization	0.0136	5	154	13	AT2G20290,AT1G08730,AT1G67120,AT5G65460,AT3G58160,AT4G33200,AT5G43900,AT1G17580,AT5G20490,AT4G27370,AT1G04160,AT5G38150,AT5G10470
	GO:0046034	ATP metabolic process	0.0333	4.97	143	12	ATCG00140,ATMG00580,ATCG00480,ATCG00130,ATMG00160,ATCG00120,ATMG01090,ATCG01010,ATMG01170,AT2G07727,ATCG00470,ATMG01360
	GO:0048285	organelle fission	0.000611	4.91	205	17	AT3G54670,AT3G23670,AT5G15540,AT3G63480,AT1G22260,AT5G51600,AT4G14150,AT3G23890,AT1G50240,AT2G32590,AT5G52290,AT2G35630,AT4G21270,AT1G65010,AT1G20720,AT4G22970,AT1G22275
	GO:0000278	mitotic cell cycle	6.25e-05	4.85	244	20	AT3G54670,AT1G20570,AT3G23670,AT5G15540,AT2G01905,AT2G28620,AT5G18700,AT3G50240,AT4G14150,AT4G15320,AT3G23890,AT2G32590,AT2G35630,AT1G08260,AT3G19050,AT5G67100,AT1G34460,AT2G22125,AT3G17360,AT5G60930
	GO:0048646	anatomical structure formation involved in morphogenesis	0.00276	4.64	204	16	AT3G02260,AT3G55500,AT1G80080,AT5G07280,AT5G18700,AT3G59530,AT2G46020,AT4G35420,AT5G51600,AT2G28290,AT1G50240,AT2G29940,AT3G12810,AT2G22125,AT1G18370,AT2G39350
	GO:0098662	inorganic cation transmembrane transport	0.00173	4.53	222	17	AT5G55470,AT2G04032,ATCG00140,ATMG00580,AT3G58810,ATCG00480,AT1G17260,ATCG00130,ATCG00120,AT3G42640,ATMG01090,ATCG01010,ATMG01170,ATCG00430,ATCG00470,ATCG01050,ATMG01360
	GO:0098655	cation transmembrane transport	0.00245	4.41	228	17	AT5G55470,AT2G04032,ATCG00140,ATMG00580,AT3G58810,ATCG00480,AT1G17260,ATCG00130,ATCG00120,AT3G42640,ATMG01090,ATCG01010,ATMG01170,ATCG00430,ATCG00470,ATCG01050,ATMG01360
	GO:0006091	generation of precursor metabolites and energy	3.22e-06	4.25	376	27	ATCG00280,ATCG00220,ATCG00270,ATCG00680,ATCG01100,ATCG00600,ATMG00580,ATCG00730,ATCG00480,ATCG00130,ATCG00360,ATMG00160,ATCG00540,ATCG00580,ATCG01010,ATCG00720,AT2G07727,ATCG00430,AT2G07718,ATCG00340,ATCG00080,ATCG00470,ATCG00020,ATCG01050,ATCG00710,ATMG01360,ATCG00520
	GO:0090558	plant epidermis development	0.00103	4.23	266	19	AT3G27920,AT2G20290,AT1G80080,AT1G34245,AT3G06120,AT5G62230,AT1G05230,AT5G18410,AT5G43900,AT1G03060,AT5G60880,AT1G17580,AT1G75120,AT1G04110,AT5G20490,AT5G53210,AT1G04160,AT5G23940,AT2G45890
	GO:0098660	inorganic ion transmembrane transport	0.00554	4.14	243	17	AT5G55470,AT2G04032,ATCG00140,ATMG00580,AT3G58810,ATCG00480,AT1G17260,ATCG00130,ATCG00120,AT3G42640,ATMG01090,ATCG01010,ATMG01170,ATCG00430,ATCG00470,ATCG01050,ATMG01360
	GO:0006812	cation transport	0.0337	3.05	407	21	AT5G55470,AT2G04032,ATCG00140,ATMG00580,AT3G58810,ATCG00480,AT1G17260,ATCG00130,ATCG00120,ATMG00110,AT3G42640,ATMG01090,ATCG01010,ATMG01170,ATCG00430,AT2G07718,ATCG01040,ATCG00470,ATCG01050,ATMG01360,AT3G17630
	GO:0009653	anatomical structure morphogenesis	2.39e-06	2.9	897	44	AT3G02260,AT1G36160,AT3G55500,AT2G20290,AT1G80080,AT1G34245,AT1G08730,AT5G07280,AT2G28620,AT5G18700,AT3G59530,AT2G46020,AT4G35420,AT1G77460,AT5G51600,AT5G62230,AT2G28290,AT5G06100,AT1G05230,AT1G50240,AT5G18410,AT5G43900,AT1G03060,AT5G60880,AT2G29940,AT1G17580,AT1G75120,AT1G04110,AT1G08260,AT5G20490,AT5G67100,AT4G32700,AT1G04160,AT3G12810,AT1G01040,AT5G24740,AT2G22125,AT5G23940,AT4G22970,AT2G45890…
	GO:0046907	intracellular transport	0.000193	2.86	724	35	AT1G48090,AT2G20290,AT4G02510,AT3G63480,AT1G08730,AT1G67120,AT5G27950,AT1G79280,ATCG00480,AT5G65460,AT3G58160,AT4G33200,AT3G08530,AT5G43900,AT1G50970,ATCG00130,AT2G26890,AT3G50380,AT1G17580,AT4G21180,AT4G05520,AT5G20490,AT4G27370,AT1G04160,AT5G24740,AT2G04030,ATCG00470,AT2G14255,AT1G06950,AT3G55480,AT3G48870,AT5G24350,AT3G11130,AT4G26660,AT5G10470
	GO:0006412	translation	0.0352	2.79	510	24	AT5G58410,ATCG00780,AT4G29060,AT1G62750,ATCG00650,AT2G07725,ATCG00380,ATCG00750,ATCG01020,ATCG00640,ATCG00790,ATCG00800,AT4G11420,AT5G22800,ATCG00760,AT2G07696,ATCG00770,AT2G40010,ATCG00660,ATCG00160,AT5G16715,ATCG00810,AT3G48110,ATMG00090
	GO:0051649	establishment of localization in cell	0.000251	2.78	767	36	AT1G48090,AT2G20290,AT4G02510,AT3G63480,AT1G08730,AT1G67120,AT5G27950,AT1G79280,ATCG00480,AT5G65460,AT3G58160,AT4G33200,AT3G08530,AT5G43900,AT1G50970,ATCG00130,AT2G26890,AT3G50380,AT1G17580,AT4G21180,AT4G05520,AT5G20490,AT4G27370,AT1G04160,AT5G24740,AT2G04030,ATCG00470,AT2G14255,AT1G06950,AT3G55480,AT3G48870,AT5G24350,AT5G38150,AT3G11130,AT4G26660,AT5G10470
	GO:0043043	peptide biosynthetic process	0.0411	2.76	515	24	AT5G58410,ATCG00780,AT4G29060,AT1G62750,ATCG00650,AT2G07725,ATCG00380,ATCG00750,ATCG01020,ATCG00640,ATCG00790,ATCG00800,AT4G11420,AT5G22800,ATCG00760,AT2G07696,ATCG00770,AT2G40010,ATCG00660,ATCG00160,AT5G16715,ATCG00810,AT3G48110,ATMG00090
	GO:0043604	amide biosynthetic process	0.0156	2.72	588	27	ATCG00500,AT1G36160,AT5G58410,ATCG00780,AT4G29060,AT1G62750,AT1G36180,ATCG00650,AT2G07725,ATCG00380,ATCG00750,ATCG01020,ATCG00640,ATCG00790,ATCG00800,AT4G11420,AT5G22800,ATCG00760,AT2G07696,ATCG00770,AT2G40010,ATCG00660,ATCG00160,AT5G16715,ATCG00810,AT3G48110,ATMG00090
	GO:0006996	organelle organization	1.97e-11	2.7	1690	77	AT3G54670,AT1G20570,AT2G04270,AT3G23670,AT2G20290,AT5G15540,AT3G63480,AT1G08730,AT2G28620,AT1G62750,AT4G05190,AT5G18700,AT2G46020,AT3G50240,AT4G32820,AT1G22260,AT5G51600,AT4G14150,AT1G67120,AT3G23890,AT5G65460,AT2G07725,AT2G28290,ATCG00750,AT1G67230,AT5G06100,AT3G58160,AT1G50240,AT5G18410,AT4G33200,AT1G17260,AT5G43900,AT2G32590,AT4G02660,AT4G13570,AT2G26890,AT1G61970,AT1G03060,AT5G52290,AT2G31970…
	GO:0006518	peptide metabolic process	0.0367	2.64	582	26	AT5G58410,ATCG00780,AT4G29060,AT1G62750,ATCG00650,AT2G07725,ATCG00380,ATCG00750,ATCG01020,ATCG00640,ATCG00790,ATCG00800,AT4G11420,AT5G22800,ATCG00760,AT2G07696,AT3G57460,AT3G57470,ATCG00770,AT2G40010,ATCG00660,ATCG00160,AT5G16715,ATCG00810,AT3G48110,ATMG00090
	GO:0048869	cellular developmental process	0.00542	2.64	694	31	AT3G27920,AT2G20290,AT1G80080,AT1G34245,AT1G08730,AT5G07280,AT5G18700,AT3G59530,AT1G02065,AT4G35420,AT3G06120,AT5G06100,AT1G05230,AT4G13750,AT5G18410,AT5G43900,AT1G03060,AT1G79840,AT2G29940,AT1G17580,AT1G75120,AT5G20490,AT1G04160,AT2G22125,AT5G23940,AT2G45890,AT2G41210,AT2G39350,AT1G55350,AT1G32583,AT5G55390
	GO:0022607	cellular component assembly	0.00573	2.48	835	35	ATCG00680,AT1G20570,AT3G23670,AT5G15540,AT4G05190,AT5G18700,AT3G59530,AT4G35420,AT4G32820,AT2G02560,AT5G51600,AT4G14150,AT1G67120,AT1G80070,AT2G42270,AT2G07725,ATCG00750,AT4G11420,AT1G03060,ATCG00360,AT2G29940,AT2G35630,AT4G21270,AT4G05520,AT2G07696,AT2G22125,AT1G54385,AT2G40010,AT2G20815,AT3G13782,AT2G39350,ATCG00660,AT5G10470,ATCG00810,ATCG00520
	GO:0051641	cellular localization	0.0014	2.48	932	39	AT1G48090,AT2G20290,AT4G02510,AT5G15540,AT3G63480,AT1G08730,AT1G77460,AT1G67120,AT5G27950,AT1G79280,ATCG00480,AT5G65460,AT3G58160,AT4G33200,AT3G08530,AT5G43900,AT1G50970,ATCG00130,AT2G26890,AT3G50380,AT1G17580,AT4G21180,AT4G05520,AT5G20490,AT4G27370,AT1G04160,AT5G24740,AT2G22125,AT2G04030,ATCG00470,AT2G14255,AT1G06950,AT3G55480,AT3G48870,AT5G24350,AT5G38150,AT3G11130,AT4G26660,AT5G10470
	GO:0055085	transmembrane transport	0.0085	2.42	855	35	AT4G04760,AT4G02510,AT5G55470,AT2G04032,ATCG00140,AT3G47750,ATMG00580,AT3G58810,ATCG00480,AT1G27940,AT1G17260,ATCG00130,AT2G29940,AT1G74810,ATCG00120,ATMG00110,AT1G27040,AT3G42640,AT5G61740,ATMG01090,AT1G30420,ATCG01010,ATMG01170,ATCG00430,AT2G04030,AT4G15230,ATCG00470,AT1G54730,AT3G21250,ATCG01050,AT1G06950,AT2G34660,ATMG01360,AT3G48870,AT5G60780
	GO:0044271	cellular nitrogen compound biosynthetic process	8.45e-05	2.4	1232	50	ATCG00500,AT1G36160,ATCG00150,AT5G58410,ATCG00780,AT4G29060,AT1G62750,AT1G36180,AT3G16410,ATCG00140,ATCG00190,ATCG00480,ATCG00650,AT2G07725,ATCG00380,ATCG00750,ATCG01020,ATCG00640,AT1G30590,AT1G14250,ATCG00130,ATCG00790,ATCG00800,ATCG00180,AT4G11420,ATCG00170,AT2G31970,ATCG00120,AT5G22800,ATCG00760,AT2G07696,AT5G67100,ATMG01090,AT1G50030,AT5G44750,ATMG01170,ATCG00470,ATCG00770,AT3G48730,AT4G03205…
	GO:0016043	cellular component organization	5.35e-12	2.39	2402	97	AT3G54670,ATCG00680,AT1G20570,AT3G55500,AT2G04270,AT3G23670,AT2G20290,AT5G15540,AT3G63480,AT1G08730,AT2G28620,AT1G62750,AT4G05190,AT5G18700,AT3G59530,AT2G21140,AT2G46020,AT3G50240,AT4G35420,AT1G77460,AT4G32820,AT2G02560,AT1G22260,AT5G51600,AT4G14150,AT1G67120,AT3G23890,AT1G80070,AT2G42270,AT5G65460,AT2G07725,AT2G28290,ATCG00750,AT1G67230,AT5G06100,AT3G58160,AT1G50240,AT5G18410,AT4G33200,AT1G17260…
	GO:0009791	post-embryonic development	1.9e-05	2.32	1482	58	AT3G02260,AT1G36160,AT5G15540,AT1G80080,AT1G34245,AT4G29060,AT3G63480,AT5G07280,AT3G27670,AT1G62750,AT5G18700,AT1G02065,AT3G05680,AT2G46020,AT4G35420,AT3G06120,AT2G02560,AT2G25660,AT1G79280,AT3G26790,AT5G62230,AT2G28290,AT1G52030,AT5G06100,AT1G05230,AT4G13750,AT3G55850,AT1G17260,AT5G43900,AT4G15180,AT2G26890,AT1G03060,AT5G60880,AT1G17580,AT1G65010,AT1G04110,AT1G08260,AT5G22800,AT5G20490,AT3G10570…
	GO:0048608	reproductive structure development	0.000923	2.3	1207	47	AT3G02260,AT1G36160,AT5G15540,AT4G29060,AT3G63480,AT5G07280,AT3G27670,AT5G18700,AT1G02065,AT3G05680,AT4G35420,AT2G02560,AT2G25660,AT1G79280,AT3G26790,AT5G62230,AT2G28290,AT1G52030,AT5G06100,AT1G05230,AT4G13750,AT1G17260,AT5G43900,AT4G15180,AT2G26890,AT1G03060,AT1G17580,AT1G65010,AT1G08260,AT5G22800,AT5G20490,AT3G10570,AT1G50030,AT3G12810,AT1G01040,AT2G22125,AT5G23940,AT2G04030,AT4G22970,AT5G40480…
	GO:0061458	reproductive system development	0.000938	2.3	1209	47	AT3G02260,AT1G36160,AT5G15540,AT4G29060,AT3G63480,AT5G07280,AT3G27670,AT5G18700,AT1G02065,AT3G05680,AT4G35420,AT2G02560,AT2G25660,AT1G79280,AT3G26790,AT5G62230,AT2G28290,AT1G52030,AT5G06100,AT1G05230,AT4G13750,AT1G17260,AT5G43900,AT4G15180,AT2G26890,AT1G03060,AT1G17580,AT1G65010,AT1G08260,AT5G22800,AT5G20490,AT3G10570,AT1G50030,AT3G12810,AT1G01040,AT2G22125,AT5G23940,AT2G04030,AT4G22970,AT5G40480…
	GO:0022414	reproductive process	2.42e-05	2.19	1732	64	AT1G25450,AT3G02260,AT1G36160,AT1G20570,AT3G23670,AT5G15540,AT4G29060,AT3G63480,AT1G08730,AT5G07280,AT1G61490,AT3G27670,AT5G18700,AT1G02065,AT3G05680,AT4G35420,AT2G02560,AT1G22260,AT2G25660,AT4G14150,AT4G03230,AT3G23890,AT1G79280,AT3G26790,AT5G62230,AT2G28290,AT1G52030,AT5G06100,AT1G05230,AT4G13750,AT1G50240,AT1G17260,AT5G43900,AT4G15180,AT2G26890,AT1G03060,AT5G52290,AT2G31970,AT1G17580,AT4G21270…
	GO:0000003	reproduction	2.82e-05	2.17	1742	64	AT1G25450,AT3G02260,AT1G36160,AT1G20570,AT3G23670,AT5G15540,AT4G29060,AT3G63480,AT1G08730,AT5G07280,AT1G61490,AT3G27670,AT5G18700,AT1G02065,AT3G05680,AT4G35420,AT2G02560,AT1G22260,AT2G25660,AT4G14150,AT4G03230,AT3G23890,AT1G79280,AT3G26790,AT5G62230,AT2G28290,AT1G52030,AT5G06100,AT1G05230,AT4G13750,AT1G50240,AT1G17260,AT5G43900,AT4G15180,AT2G26890,AT1G03060,AT5G52290,AT2G31970,AT1G17580,AT4G21270…
	GO:0071840	cellular component organization or biogenesis	1.66e-09	2.13	2809	101	AT3G54670,ATCG00680,AT1G20570,AT3G55500,AT2G04270,AT3G23670,AT2G20290,AT5G15540,AT3G63480,AT1G08730,AT2G28620,AT1G62750,AT4G05190,AT5G18700,AT3G59530,AT2G21140,AT2G46020,AT3G50240,AT4G35420,AT1G77460,AT4G32820,AT2G02560,AT1G22260,AT5G51600,AT4G14150,AT4G15320,AT1G67120,AT3G23890,AT1G80070,AT3G23730,AT2G42270,AT5G65460,AT2G07725,AT2G28290,ATCG00750,AT1G67230,AT5G06100,AT3G58160,AT1G50240,AT5G18410…
	GO:0003006	developmental process involved in reproduction	0.00836	2.06	1437	50	AT1G25450,AT3G02260,AT1G36160,AT5G15540,AT4G29060,AT3G63480,AT1G08730,AT5G07280,AT3G27670,AT5G18700,AT1G02065,AT3G05680,AT4G35420,AT2G02560,AT2G25660,AT1G79280,AT3G26790,AT5G62230,AT2G28290,AT1G52030,AT5G06100,AT1G05230,AT4G13750,AT1G17260,AT5G43900,AT4G15180,AT2G26890,AT1G03060,AT1G17580,AT1G65010,AT1G08260,AT5G22800,AT5G20490,AT3G10570,AT1G50030,AT3G12810,AT1G01040,AT2G22125,AT5G23940,AT2G04030…
	GO:0009059	macromolecule biosynthetic process	0.0491	2.01	1327	45	AT5G51820,AT5G58410,ATCG00780,AT4G29060,AT1G62750,AT1G77460,ATCG00190,ATCG00650,AT2G07725,ATCG00380,ATCG00750,ATCG01020,ATCG00640,AT1G30590,ATCG00790,ATCG00800,ATCG00180,AT4G11420,ATCG00170,AT2G31970,AT1G11720,AT1G08260,AT5G22800,AT5G52910,ATCG00760,AT3G10570,AT2G07696,AT5G67100,AT4G32700,AT1G50030,AT5G44750,AT2G22125,AT5G23940,AT2G14255,ATCG00770,AT2G40010,AT5G40820,AT1G66730,ATCG00740,ATCG00660…
	GO:0051234	establishment of localization	3.29e-05	1.99	2294	77	AT3G02260,AT1G48090,AT3G43300,AT4G04760,AT2G20290,AT4G02510,AT5G15540,AT5G55470,AT3G63480,AT1G08730,AT2G25660,AT2G04032,ATCG00140,AT3G47750,AT1G67120,AT5G27950,ATMG00580,AT3G58810,AT1G79280,ATCG00480,AT5G65460,AT1G27940,AT3G58160,AT4G13750,AT1G51460,AT4G33200,AT3G08530,AT1G17260,AT5G43900,AT1G50970,ATCG00130,AT2G26890,AT3G50380,AT2G29940,AT1G17580,AT1G74810,AT4G21180,ATCG00120,ATMG00110,AT5G55220…
	GO:0006810	transport	0.0001	1.97	2249	75	AT3G02260,AT1G48090,AT3G43300,AT4G04760,AT2G20290,AT4G02510,AT5G55470,AT3G63480,AT1G08730,AT2G25660,AT2G04032,ATCG00140,AT3G47750,AT1G67120,AT5G27950,ATMG00580,AT3G58810,AT1G79280,ATCG00480,AT5G65460,AT1G27940,AT3G58160,AT4G13750,AT1G51460,AT4G33200,AT3G08530,AT1G17260,AT5G43900,AT1G50970,ATCG00130,AT2G26890,AT3G50380,AT2G29940,AT1G17580,AT1G74810,AT4G21180,ATCG00120,ATMG00110,AT5G55220,AT1G27040…
	GO:0007275	multicellular organism development	3.29e-05	1.95	2459	81	AT1G25450,AT3G02260,AT1G36160,AT3G27920,AT3G23670,AT5G33370,AT2G20290,AT5G15540,AT1G80080,AT1G34245,AT4G29060,AT3G63480,AT5G07280,AT3G27670,AT1G62750,AT5G18700,AT3G59530,AT1G02065,AT3G05680,AT2G46020,AT4G35420,AT3G06120,AT2G02560,AT2G25660,AT4G14150,AT1G67120,AT1G79280,AT3G26790,AT5G62230,AT2G28290,AT1G52030,AT5G06100,AT1G05230,AT4G13750,AT1G50240,AT3G23840,AT3G55850,AT1G51460,AT1G17260,AT5G43900…
	GO:0051179	localization	8.65e-05	1.93	2459	80	AT3G02260,AT1G48090,AT3G43300,AT4G04760,AT2G20290,AT4G02510,AT5G15540,AT5G55470,AT3G63480,AT1G08730,AT1G77460,AT2G25660,AT2G04032,ATCG00140,AT3G47750,AT1G67120,AT5G27950,ATMG00580,AT3G58810,AT1G79280,ATCG00480,AT5G65460,AT1G27940,AT3G58160,AT4G13750,AT1G51460,AT4G33200,AT3G08530,AT1G17260,AT5G43900,AT1G50970,ATCG00130,AT2G26890,AT3G50380,AT2G29940,AT1G17580,AT1G74810,AT4G21180,ATCG00120,ATMG00110…
	GO:0032501	multicellular organismal process	4.28e-05	1.88	2741	87	AT1G25450,AT3G02260,AT1G36160,AT3G27920,AT3G23670,AT5G33370,AT2G20290,AT5G15540,AT1G80080,AT1G34245,AT4G29060,AT3G63480,AT1G08730,AT5G07280,AT1G61490,AT3G27670,AT1G62750,AT5G18700,AT3G59530,AT1G02065,AT3G05680,AT2G46020,AT4G35420,AT3G06120,AT2G02560,AT2G25660,AT4G14150,AT4G03230,AT1G67120,AT1G79280,AT3G26790,AT5G62230,AT2G28290,AT1G52030,AT5G06100,AT1G05230,AT4G13750,AT1G50240,AT3G23840,AT3G55850…
	GO:0048856	anatomical structure development	4.92e-05	1.85	2843	89	AT1G25450,AT3G02260,AT1G36160,AT3G55500,AT3G27920,AT3G23670,AT5G33370,AT2G20290,AT5G15540,AT1G80080,AT1G34245,AT4G29060,AT3G63480,AT1G08730,AT5G07280,AT3G27670,AT2G28620,AT1G62750,AT5G18700,AT3G59530,AT1G02065,AT3G05680,AT2G46020,AT4G35420,AT3G06120,AT1G77460,AT2G02560,AT2G25660,AT5G51600,AT4G14150,AT1G67120,AT1G79280,AT3G26790,AT5G62230,AT2G28290,AT1G52030,AT5G06100,AT1G05230,AT4G13750,AT1G50240…
	GO:0032502	developmental process	0.000154	1.8	2998	91	AT1G25450,AT3G02260,AT1G36160,AT3G55500,AT3G27920,AT3G23670,AT5G33370,AT2G20290,AT5G15540,AT1G80080,AT1G34245,AT4G29060,AT3G63480,AT1G08730,AT5G07280,AT3G27670,AT2G28620,AT1G62750,AT5G18700,AT3G59530,AT1G02065,AT3G05680,AT2G46020,AT4G35420,AT3G06120,AT1G77460,AT2G02560,AT2G25660,AT5G51600,AT4G14150,AT1G67120,AT1G79280,AT3G26790,AT5G62230,AT2G28290,AT1G52030,AT5G06100,AT1G05230,AT4G13750,AT1G50240…
	GO:0034641	cellular nitrogen compound metabolic process	0.00068	1.78	2859	86	ATCG00500,AT1G36160,AT5G51660,ATCG00150,AT5G58410,AT2G04270,AT5G15540,ATCG00780,AT4G29060,AT1G62750,AT1G19720,AT3G05680,AT1G20920,AT1G36180,AT1G76630,AT1G22260,AT3G16410,ATCG00140,ATCG00190,AT1G67120,AT3G23890,AT1G80070,ATCG00480,AT2G42270,ATCG00650,AT2G07725,ATCG00380,ATCG00750,ATCG01020,ATCG00640,AT1G30590,AT1G14250,ATCG00130,ATCG00790,AT5G24670,ATCG00800,AT3G03300,ATCG00180,AT4G11420,ATCG00170…
	GO:0009987	cellular process	6.64e-25	1.59	11931	321	AT1G25450,AT2G37840,ATCG00350,ATCG00500,AT1G55490,ATCG00280,AT3G54670,AT5G65930,AT3G02260,ATCG00220,AT1G36160,ATCG00270,AT5G51820,ATCG00680,AT1G20570,AT3G14540,AT3G55500,ATCG00150,AT5G51660,AT4G33260,AT3G27920,AT1G48090,AT5G58410,AT2G04270,AT3G43300,AT1G04920,AT3G23670,AT1G53780,AT4G04760,AT1G63710,AT2G20290,ATCG01100,AT4G02510,AT5G15540,AT4G33270,AT5G02880,ATCG00780,AT1G72250,AT2G01905,AT1G80080…
	GO:0044237	cellular metabolic process	5.95e-06	1.47	7602	189	AT1G25450,AT2G37840,ATCG00350,ATCG00500,ATCG00280,AT1G36160,ATCG00220,ATCG00270,AT5G51820,ATCG00680,AT3G14540,AT5G51660,ATCG00150,AT4G33260,AT5G58410,AT2G04270,AT1G04920,AT1G53780,AT1G63710,ATCG01100,AT5G15540,AT4G33270,AT5G02880,ATCG00780,AT4G29060,AT5G07280,AT4G21410,AT1G61490,AT3G27670,AT1G62750,AT5G25980,AT5G18700,AT1G19720,AT3G05680,AT4G01190,AT1G20920,AT4G35420,ATCG00600,AT1G78530,AT1G77460…
	GO:0008152	metabolic process	2.9e-05	1.41	8604	205	AT1G25450,AT2G37840,ATCG00350,ATCG00500,ATCG00280,ATCG00220,AT1G36160,ATCG00270,AT5G51820,ATCG00680,AT3G14540,ATCG00150,AT5G51660,AT4G33260,AT5G58410,AT2G04270,AT1G04920,AT1G53780,AT1G63710,ATCG01100,AT5G15540,AT4G33270,AT5G02880,ATCG00780,AT4G29060,AT5G07280,AT4G21410,AT1G61490,AT3G27670,AT1G74000,AT1G62750,AT5G25980,AT5G18700,AT3G59530,AT1G19720,AT3G05680,AT4G01190,AT1G20920,ATCG00600,AT4G35420…
WT_U_TRAP / WT_U: Upregulated	GO_accession	Description	Over_represented_pValue	Fold Enrichment	Arabidopsis thaliana - REFLIST (27462)	Number of Genes in GO term category	Gene_names
	GO:0009407	toxin catabolic process	0.0494	17.16	46	5	AT1G17170,AT4G02520,AT1G78320,AT2G29460,AT2G29420
	GO:0009404	toxin metabolic process	0.00988	16.05	59	6	AT1G17170,AT4G02520,AT1G78320,AT2G29460,AT4G39950,AT2G29420
	GO:0009636	response to toxic substance	0.0469	9.21	120	7	AT5G64120,AT1G17170,AT4G02520,AT1G78320,AT2G29460,AT2G29420,AT5G42980
	GO:0019748	secondary metabolic process	0.00234	6.25	303	12	AT5G64120,AT1G17170,AT4G02520,AT1G66140,AT5G05340,AT1G78320,AT2G29460,AT4G39950,AT1G68360,AT2G38080,AT5G13330,AT2G29420
	GO:2000112	regulation of cellular macromolecule biosynthetic process	0.000239	2.55	2356	38	AT5G16470,AT4G20970,AT5G06800,AT1G69410,AT5G57520,AT2G20880,AT1G29160,AT5G58360,AT3G20898,AT2G01200,AT1G66140,AT2G47870,AT3G53370,AT1G15050,AT3G57670,AT2G38250,AT4G08150,AT1G53160,AT5G42780,AT4G30980,AT1G12260,AT3G58780,AT3G19500,AT5G42630,AT5G61890,AT5G64530,AT5G51780,AT5G44160,AT5G04470,AT3G52860,AT1G75390,AT1G68360,AT5G52830,AT2G28510,AT5G13330,AT3G21890,AT1G03840,AT3G62930
	GO:0006355	regulation of transcription, DNA-templated	0.000929	2.54	2176	35	AT5G16470,AT4G20970,AT5G06800,AT5G57520,AT2G20880,AT1G29160,AT5G58360,AT2G01200,AT1G66140,AT2G47870,AT3G53370,AT1G15050,AT3G57670,AT2G38250,AT4G08150,AT1G53160,AT5G42780,AT4G30980,AT1G12260,AT3G58780,AT3G19500,AT5G42630,AT5G61890,AT5G64530,AT5G51780,AT5G44160,AT3G52860,AT1G75390,AT1G68360,AT5G52830,AT2G28510,AT5G13330,AT3G21890,AT1G03840,AT3G62930
	GO:1903506	regulation of nucleic acid-templated transcription	0.000929	2.54	2176	35	AT5G16470,AT4G20970,AT5G06800,AT5G57520,AT2G20880,AT1G29160,AT5G58360,AT2G01200,AT1G66140,AT2G47870,AT3G53370,AT1G15050,AT3G57670,AT2G38250,AT4G08150,AT1G53160,AT5G42780,AT4G30980,AT1G12260,AT3G58780,AT3G19500,AT5G42630,AT5G61890,AT5G64530,AT5G51780,AT5G44160,AT3G52860,AT1G75390,AT1G68360,AT5G52830,AT2G28510,AT5G13330,AT3G21890,AT1G03840,AT3G62930
	GO:2001141	regulation of RNA biosynthetic process	0.000949	2.54	2178	35	AT5G16470,AT4G20970,AT5G06800,AT5G57520,AT2G20880,AT1G29160,AT5G58360,AT2G01200,AT1G66140,AT2G47870,AT3G53370,AT1G15050,AT3G57670,AT2G38250,AT4G08150,AT1G53160,AT5G42780,AT4G30980,AT1G12260,AT3G58780,AT3G19500,AT5G42630,AT5G61890,AT5G64530,AT5G51780,AT5G44160,AT3G52860,AT1G75390,AT1G68360,AT5G52830,AT2G28510,AT5G13330,AT3G21890,AT1G03840,AT3G62930
	GO:0010556	regulation of macromolecule biosynthetic process	0.000275	2.53	2369	38	AT5G16470,AT4G20970,AT5G06800,AT1G69410,AT5G57520,AT2G20880,AT1G29160,AT5G58360,AT3G20898,AT2G01200,AT1G66140,AT2G47870,AT3G53370,AT1G15050,AT3G57670,AT2G38250,AT4G08150,AT1G53160,AT5G42780,AT4G30980,AT1G12260,AT3G58780,AT3G19500,AT5G42630,AT5G61890,AT5G64530,AT5G51780,AT5G44160,AT5G04470,AT3G52860,AT1G75390,AT1G68360,AT5G52830,AT2G28510,AT5G13330,AT3G21890,AT1G03840,AT3G62930
	GO:0031326	regulation of cellular biosynthetic process	0.00044	2.49	2468	39	AT5G16470,AT4G20970,AT5G06800,AT1G69410,AT5G57520,AT2G20880,AT1G29160,AT5G58360,AT3G20898,AT2G01200,AT1G66140,AT2G47870,AT3G53370,AT1G15050,AT3G57670,AT2G38250,AT4G08150,AT1G53160,AT5G42780,AT5G05340,AT4G30980,AT1G12260,AT3G58780,AT3G19500,AT5G42630,AT5G61890,AT5G64530,AT5G51780,AT5G44160,AT5G04470,AT3G52860,AT1G75390,AT1G68360,AT5G52830,AT2G28510,AT5G13330,AT3G21890,AT1G03840,AT3G62930
	GO:0009889	regulation of biosynthetic process	0.000523	2.46	2505	39	AT5G16470,AT4G20970,AT5G06800,AT1G69410,AT5G57520,AT2G20880,AT1G29160,AT5G58360,AT3G20898,AT2G01200,AT1G66140,AT2G47870,AT3G53370,AT1G15050,AT3G57670,AT2G38250,AT4G08150,AT1G53160,AT5G42780,AT5G05340,AT4G30980,AT1G12260,AT3G58780,AT3G19500,AT5G42630,AT5G61890,AT5G64530,AT5G51780,AT5G44160,AT5G04470,AT3G52860,AT1G75390,AT1G68360,AT5G52830,AT2G28510,AT5G13330,AT3G21890,AT1G03840,AT3G62930
	GO:0051252	regulation of RNA metabolic process	0.00332	2.43	2277	35	AT5G16470,AT4G20970,AT5G06800,AT5G57520,AT2G20880,AT1G29160,AT5G58360,AT2G01200,AT1G66140,AT2G47870,AT3G53370,AT1G15050,AT3G57670,AT2G38250,AT4G08150,AT1G53160,AT5G42780,AT4G30980,AT1G12260,AT3G58780,AT3G19500,AT5G42630,AT5G61890,AT5G64530,AT5G51780,AT5G44160,AT3G52860,AT1G75390,AT1G68360,AT5G52830,AT2G28510,AT5G13330,AT3G21890,AT1G03840,AT3G62930
	GO:0019219	regulation of nucleobase-containing compound metabolic process	0.00516	2.36	2336	35	AT5G16470,AT4G20970,AT5G06800,AT5G57520,AT2G20880,AT1G29160,AT5G58360,AT2G01200,AT1G66140,AT2G47870,AT3G53370,AT1G15050,AT3G57670,AT2G38250,AT4G08150,AT1G53160,AT5G42780,AT4G30980,AT1G12260,AT3G58780,AT3G19500,AT5G42630,AT5G61890,AT5G64530,AT5G51780,AT5G44160,AT3G52860,AT1G75390,AT1G68360,AT5G52830,AT2G28510,AT5G13330,AT3G21890,AT1G03840,AT3G62930
	GO:0051171	regulation of nitrogen compound metabolic process	0.0148	2.2	2731	38	AT5G16470,AT4G20970,AT5G06800,AT1G69410,AT5G57520,AT2G20880,AT1G29160,AT5G58360,AT2G01200,AT1G66140,AT2G47870,AT3G53370,AT1G15050,AT3G57670,AT2G38250,AT4G08150,AT1G53160,AT5G42780,AT4G30980,AT1G12260,AT3G58780,AT3G19500,AT5G42630,AT5G61890,AT5G64530,AT5G51780,AT5G44160,AT5G04470,AT3G52860,AT1G75390,AT1G68360,AT5G52830,AT2G28510,AT5G13330,AT3G21890,AT1G03840,AT3G62930,AT4G38740
	GO:0010468	regulation of gene expression	0.0223	2.19	2670	37	AT5G16470,AT4G20970,AT5G06800,AT1G69410,AT4G18980,AT5G57520,AT2G20880,AT1G29160,AT5G58360,AT2G01200,AT1G66140,AT2G47870,AT3G53370,AT1G15050,AT3G57670,AT2G38250,AT4G08150,AT1G53160,AT5G42780,AT4G30980,AT1G12260,AT3G58780,AT3G19500,AT5G42630,AT5G61890,AT5G64530,AT5G51780,AT5G44160,AT3G52860,AT1G75390,AT1G68360,AT5G52830,AT2G28510,AT5G13330,AT3G21890,AT1G03840,AT3G62930
	GO:0080090	regulation of primary metabolic process	0.0215	2.13	2816	38	AT5G16470,AT4G20970,AT5G06800,AT1G69410,AT5G57520,AT2G20880,AT1G29160,AT5G58360,AT2G01200,AT1G66140,AT2G47870,AT3G53370,AT1G15050,AT3G57670,AT2G38250,AT4G08150,AT1G53160,AT5G42780,AT4G30980,AT1G12260,AT3G58780,AT3G19500,AT5G42630,AT5G61890,AT5G64530,AT5G51780,AT5G44160,AT5G04470,AT3G52860,AT1G75390,AT1G68360,AT5G52830,AT2G28510,AT5G13330,AT3G21890,AT1G03840,AT3G62930,AT4G38740
	GO:0031323	regulation of cellular metabolic process	0.0111	2.13	2966	40	AT5G16470,AT4G20970,AT5G06800,AT1G69410,AT5G57520,AT2G20880,AT1G29160,AT5G58360,AT3G20898,AT2G01200,AT1G66140,AT2G47870,AT3G53370,AT1G15050,AT3G57670,AT2G38250,AT4G08150,AT1G53160,AT5G42780,AT5G05340,AT4G30980,AT1G12260,AT3G58780,AT3G19500,AT5G42630,AT5G61890,AT5G64530,AT5G51780,AT5G44160,AT5G04470,AT3G52860,AT1G75390,AT1G68360,AT5G52830,AT2G28510,AT5G13330,AT3G21890,AT1G03840,AT3G62930,AT4G38740
	GO:0060255	regulation of macromolecule metabolic process	0.0248	2.07	3048	40	AT5G16470,AT4G20970,AT5G06800,AT1G69410,AT4G18980,AT5G57520,AT2G20880,AT1G29160,AT5G58360,AT3G20898,AT2G01200,AT1G66140,AT2G47870,AT3G53370,AT1G15050,AT3G57670,AT2G38250,AT4G08150,AT1G53160,AT5G42780,AT4G30980,AT1G12260,AT3G58780,AT3G19500,AT5G42630,AT5G61890,AT5G64530,AT5G51780,AT5G44160,AT5G04470,AT3G52860,AT1G75390,AT1G68360,AT5G52830,AT2G28510,AT5G13330,AT3G21890,AT1G03840,AT3G62930,AT4G38740
WT_U_TRAP / WT_U: Downregulated	GO_accession	Description	Over_represented_pValue	Fold Enrichment	Arabidopsis thaliana - REFLIST (27462)	Number of Genes in GO term category	Gene_names
	GO:0032012	regulation of ARF protein signal transduction	8.6e-06	79.22	8	3	AT1G13980,AT3G60860,AT1G01960
	GO:0046578	regulation of Ras protein signal transduction	1.67e-05	63.37	10	3	AT1G13980,AT3G60860,AT1G01960
	GO:0051056	regulation of small GTPase mediated signal transduction	1.67e-05	63.37	10	3	AT1G13980,AT3G60860,AT1G01960
WT_W_TRAP / WT_W: Upregulated	GO_accession	Description	Over_represented_pValue	Fold Enrichment	Arabidopsis thaliana - REFLIST (27462)	Number of Genes in GO term category	Gene_names
	GO:0009299	mRNA transcription	0.000243	56.48	17	5	AT1G78815,AT4G18610,AT1G07090,AT2G42610,AT3G23290
	GO:0090698	post-embryonic plant morphogenesis	0.0372	7.72	199	8	AT1G68130,AT1G78815,AT4G18610,AT1G07090,AT2G42610,AT3G23290,AT1G52880,AT1G25250
	GO:0009605	response to external stimulus	0.000234	3.31	1507	26	AT1G18570,AT1G68130,AT4G14465,AT3G56710,AT1G29290,AT3G10525,AT4G39260,AT2G02930,AT1G01470,AT3G44260,AT5G22250,AT2G30080,AT3G10190,AT5G67620,AT2G15970,AT1G73010,AT3G48550,AT3G23170,AT1G74930,AT5G65340,AT3G22231,AT3G60640,AT1G25250,AT1G66410,AT5G37780,AT1G04330,AT4G14450
	GO:0009628	response to abiotic stimulus	6.96e-07	3.25	2129	36	AT3G28600,AT1G68130,AT3G46080,AT4G39730,AT1G78815,AT3G56710,AT1G29290,AT1G73330,AT4G18610,AT1G10140,AT1G74660,AT4G39260,AT1G07090,AT2G42610,AT4G25470,AT1G01470,AT4G27280,AT3G23290,AT3G61190,AT1G46768,AT3G43800,AT2G15970,AT1G73010,AT3G48550,AT5G11150,AT3G23170,AT5G22270,AT3G22231,AT1G22220,AT1G25250,AT5G39760,AT1G66410,AT5G37780,AT3G57540,AT1G05260,AT1G76560,AT4G25490
	GO:0006950	response to stress	1.04e-06	2.73	3100	44	AT3G28600,AT5G58390,AT1G78410,AT1G18570,AT3G46080,AT4G14465,AT4G39730,AT3G56710,AT1G29290,AT3G10525,AT1G73330,AT1G10140,AT4G39260,AT4G25470,AT1G01470,AT4G27280,AT3G44260,AT1G22990,AT2G02100,AT2G41480,AT3G61190,AT1G46768,AT5G22250,AT3G49930,AT3G10190,AT2G15970,AT1G73010,AT1G77380,AT5G11150,AT1G52200,AT3G23170,AT1G74930,AT5G22270,AT3G14430,AT3G60640,AT1G22220,AT3G57540,AT4G39410,AT1G04330,AT4G14450…
	GO:2000112	regulation of cellular macromolecule biosynthetic process	0.000417	2.69	2356	33	AT5G66350,AT5G51990,AT1G68130,AT3G46080,AT5G21960,AT3G56710,AT3G10525,AT1G12630,AT1G29280,AT1G74660,AT4G25470,AT5G39850,AT3G44260,AT1G30650,AT1G28370,AT1G46768,AT5G22250,AT2G34830,AT3G49930,AT5G25810,AT1G19210,AT3G20640,AT1G69260,AT1G74930,AT1G71450,AT1G52880,AT1G25250,AT5G39760,AT2G34140,AT2G47890,AT1G01640,AT4G39410,AT4G25490
	GO:0009889	regulation of biosynthetic process	0.000167	2.68	2505	35	AT5G66350,AT5G51990,AT1G68130,AT3G46080,AT5G21960,AT3G56710,AT3G10525,AT1G12630,AT1G29280,AT1G74660,AT4G25470,AT5G39850,AT3G44260,AT1G30650,AT1G28370,AT1G46768,AT5G22250,AT2G34830,AT3G49930,AT5G25810,AT1G19210,AT3G20640,AT1G69260,AT1G74930,AT1G71450,AT3G22231,AT1G52880,AT1G25250,AT5G39760,AT2G34140,AT2G47890,AT1G01640,AT4G39410,AT1G76560,AT4G25490
	GO:0010556	regulation of macromolecule biosynthetic process	0.000473	2.68	2369	33	AT5G66350,AT5G51990,AT1G68130,AT3G46080,AT5G21960,AT3G56710,AT3G10525,AT1G12630,AT1G29280,AT1G74660,AT4G25470,AT5G39850,AT3G44260,AT1G30650,AT1G28370,AT1G46768,AT5G22250,AT2G34830,AT3G49930,AT5G25810,AT1G19210,AT3G20640,AT1G69260,AT1G74930,AT1G71450,AT1G52880,AT1G25250,AT5G39760,AT2G34140,AT2G47890,AT1G01640,AT4G39410,AT4G25490
	GO:0031326	regulation of cellular biosynthetic process	0.000379	2.65	2468	34	AT5G66350,AT5G51990,AT1G68130,AT3G46080,AT5G21960,AT3G56710,AT3G10525,AT1G12630,AT1G29280,AT1G74660,AT4G25470,AT5G39850,AT3G44260,AT1G30650,AT1G28370,AT1G46768,AT5G22250,AT2G34830,AT3G49930,AT5G25810,AT1G19210,AT3G20640,AT1G69260,AT1G74930,AT1G71450,AT3G22231,AT1G52880,AT1G25250,AT5G39760,AT2G34140,AT2G47890,AT1G01640,AT4G39410,AT4G25490
	GO:0006355	regulation of transcription, DNA-templated	0.0222	2.47	2176	28	AT5G66350,AT5G51990,AT1G68130,AT3G46080,AT5G21960,AT3G56710,AT1G12630,AT1G29280,AT1G74660,AT4G25470,AT1G30650,AT1G28370,AT1G46768,AT2G34830,AT3G49930,AT5G25810,AT1G19210,AT3G20640,AT1G69260,AT1G74930,AT1G71450,AT1G52880,AT1G25250,AT5G39760,AT2G34140,AT2G47890,AT4G39410,AT4G25490
	GO:1903506	regulation of nucleic acid-templated transcription	0.0222	2.47	2176	28	AT5G66350,AT5G51990,AT1G68130,AT3G46080,AT5G21960,AT3G56710,AT1G12630,AT1G29280,AT1G74660,AT4G25470,AT1G30650,AT1G28370,AT1G46768,AT2G34830,AT3G49930,AT5G25810,AT1G19210,AT3G20640,AT1G69260,AT1G74930,AT1G71450,AT1G52880,AT1G25250,AT5G39760,AT2G34140,AT2G47890,AT4G39410,AT4G25490
	GO:2001141	regulation of RNA biosynthetic process	0.0226	2.47	2178	28	AT5G66350,AT5G51990,AT1G68130,AT3G46080,AT5G21960,AT3G56710,AT1G12630,AT1G29280,AT1G74660,AT4G25470,AT1G30650,AT1G28370,AT1G46768,AT2G34830,AT3G49930,AT5G25810,AT1G19210,AT3G20640,AT1G69260,AT1G74930,AT1G71450,AT1G52880,AT1G25250,AT5G39760,AT2G34140,AT2G47890,AT4G39410,AT4G25490
	GO:0042221	response to chemical	0.00349	2.44	2676	34	AT5G66350,AT3G46080,AT4G39730,AT1G29290,AT1G73330,AT1G10140,AT1G74660,AT4G39260,AT2G02930,AT1G43040,AT1G01470,AT4G27280,AT4G11360,AT1G28370,AT1G22990,AT3G61190,AT1G46768,AT3G49930,AT3G43800,AT2G15970,AT1G73010,AT1G69260,AT3G23170,AT5G22270,AT3G22231,AT1G22220,AT5G39760,AT1G66410,AT5G37780,AT4G29110,AT3G57540,AT4G39410,AT1G05260,AT1G76560,AT4G25490
	GO:0031323	regulation of cellular metabolic process	0.00127	2.4	2966	37	AT5G66350,AT5G51990,AT1G68130,AT3G46080,AT5G21960,AT3G56710,AT3G10525,AT1G73330,AT1G12630,AT1G29280,AT1G74660,AT4G25470,AT5G39850,AT3G44260,AT1G30650,AT1G28370,AT1G46768,AT5G22250,AT2G34830,AT3G49930,AT5G25810,AT1G19210,AT3G20640,AT1G69260,AT1G74930,AT5G22270,AT1G71450,AT3G22231,AT1G52880,AT1G25250,AT5G39760,AT2G34140,AT2G47890,AT1G01640,AT4G39410,AT1G76560,AT4G25490
	GO:0050896	response to stimulus	2.12e-10	2.39	5538	69	AT3G28600,AT5G66350,AT5G58390,AT1G78410,AT1G18570,AT1G68130,AT3G46080,AT4G14465,AT4G39730,AT1G78815,AT3G56710,AT1G29290,AT3G10525,AT1G73330,AT4G18610,AT1G10140,AT1G74660,AT4G39260,AT1G07090,AT2G42610,AT2G02930,AT4G25470,AT1G43040,AT1G01470,AT4G27280,AT3G23290,AT4G11360,AT3G44260,AT1G28370,AT1G22990,AT2G02100,AT2G41480,AT3G61190,AT1G46768,AT3G50770,AT5G22250,AT3G49930,AT2G30080,AT3G10190,AT5G67620…
	GO:0080090	regulation of primary metabolic process	0.00314	2.39	2816	35	AT5G66350,AT5G51990,AT1G68130,AT3G46080,AT5G21960,AT3G56710,AT1G73330,AT1G12630,AT1G29280,AT1G74660,AT4G25470,AT5G39850,AT3G44260,AT1G30650,AT1G28370,AT1G46768,AT5G22250,AT2G34830,AT3G49930,AT5G25810,AT1G19210,AT3G20640,AT1G69260,AT1G74930,AT1G71450,AT3G22231,AT1G52880,AT1G25250,AT5G39760,AT2G34140,AT2G47890,AT1G01640,AT4G39410,AT1G76560,AT4G25490
	GO:0051171	regulation of nitrogen compound metabolic process	0.0117	2.32	2731	33	AT5G66350,AT5G51990,AT1G68130,AT3G46080,AT5G21960,AT3G56710,AT1G73330,AT1G12630,AT1G29280,AT1G74660,AT4G25470,AT5G39850,AT3G44260,AT1G30650,AT1G28370,AT1G46768,AT5G22250,AT2G34830,AT3G49930,AT5G25810,AT1G19210,AT3G20640,AT1G69260,AT1G74930,AT1G71450,AT1G52880,AT1G25250,AT5G39760,AT2G34140,AT2G47890,AT1G01640,AT4G39410,AT4G25490
	GO:0010468	regulation of gene expression	0.0199	2.3	2670	32	AT5G66350,AT5G51990,AT1G68130,AT3G46080,AT5G21960,AT3G56710,AT1G12630,AT1G29280,AT1G74660,AT4G25470,AT5G39850,AT3G44260,AT1G30650,AT1G28370,AT1G46768,AT5G22250,AT2G34830,AT3G49930,AT5G25810,AT1G19210,AT3G20640,AT1G69260,AT1G74930,AT1G71450,AT1G52880,AT1G25250,AT5G39760,AT2G34140,AT2G47890,AT1G01640,AT4G39410,AT4G25490
	GO:0019222	regulation of metabolic process	0.0206	2.14	3316	37	AT5G66350,AT5G51990,AT1G68130,AT3G46080,AT5G21960,AT3G56710,AT3G10525,AT1G73330,AT1G12630,AT1G29280,AT1G74660,AT4G25470,AT5G39850,AT3G44260,AT1G30650,AT1G28370,AT1G46768,AT5G22250,AT2G34830,AT3G49930,AT5G25810,AT1G19210,AT3G20640,AT1G69260,AT1G74930,AT5G22270,AT1G71450,AT3G22231,AT1G52880,AT1G25250,AT5G39760,AT2G34140,AT2G47890,AT1G01640,AT4G39410,AT1G76560,AT4G25490
WT_W_TRAP / WT_W: Downregulated	GO_accession	Description	Over_represented_pValue	Fold Enrichment	Arabidopsis thaliana - REFLIST (27462)	Number of Genes in GO term category	Gene_names
	GO:0000819	sister chromatid segregation	0.0347	10.02	57	4	AT5G48600,AT1G64960,AT2G27170,AT2G20635
	GO:0098813	nuclear chromosome segregation	0.0154	7.65	96	14	AT3G06010,AT5G48600,AT1G70060,AT1G64960,AT3G01320,AT1G27880,AT1G69770,AT1G24190,AT1G05830,AT2G27170,AT4G14180,AT1G55970,AT2G32940,AT2G20635
	GO:0051276	chromosome organization	0.00505	3.31	542	6	AT5G48600,AT1G64960,AT5G48390,AT2G27170,AT4G14180,AT2G20635
	GO:0006259	DNA metabolic process	0.0332	3.25	477	10	AT4G00020,AT1G35530,AT5G63960,AT1G27880,AT1G69770,AT5G01630,AT5G48390,AT5G45720,AT4G14180,AT2G32940
	GO:0007049	cell cycle	0.0203	3.13	548	14	AT2G36850,AT5G48600,AT1G35530,AT5G54670,AT1G64960,AT4G37490,AT3G63130,AT1G69770,AT2G17620,AT5G48390,AT2G27170,AT4G14180,AT2G20635,AT1G03780
